# Supplementary material for: DMSO-promoted direct δ-selective arylation of p-quinone methenylpiperidine bearinides to generate fuchsones under metal-free conditions by employing p-QMs themselves or substituted phenols as aryl sources
Source: Royal Society of Chemistry journal article supplement (doi:10.1039/d3ob01018j), 2023-01-01

**DMSO-Promoted Direct  $\delta$ -Selective Arylation of *p*-Quinone  
Methides to Generate Fuchsones under Metal-free Conditions  
by Employing *p*-QMs themselves or Substituted Phenols as Aryl  
Sources**

Kunpeng Wang,<sup>+,a</sup> Jingping Li,<sup>+,a</sup> Haoxiang Zhang,<sup>a</sup> Yan Chen,<sup>a</sup> Mengfan Li,<sup>a</sup> Junju  
Xu,<sup>\*,b</sup> Benren Liao,<sup>\*,c</sup> and Weiyin Yi <sup>\*,a</sup>

**Supporting information**

Table of contents

|                                                                        |         |
|------------------------------------------------------------------------|---------|
| 1. X-Ray Data .....                                                    | S2-S3   |
| 2. Experimental Section.....                                           | S4-S7   |
| 3. Characterization data for all products.....                         | S8-S25  |
| 4. <sup>1</sup> H and <sup>13</sup> C NMR spectra of the products..... | S26-S71 |

## 1. X-Ray Data

Crystal structure of the compound **2a**. Thermal ellipsoids are shown at 40% probability level.

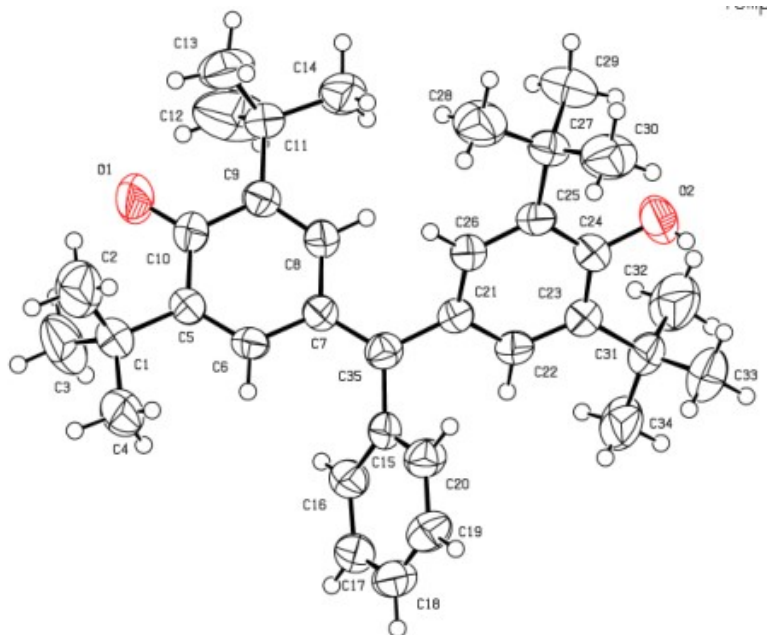

key bond length(Å)  
C(7)-C(35) 1.385(6)  
C(15)-C(35) 1.488(6)  
C(21)-C(35)  
1.477(6)  
C(10)-O(1) 1.232(5)  
C(24)-O(2) 1.371(5)

**2a**: CCDC: 2141501

| Identification code               | 1_a                                            |                   |
|-----------------------------------|------------------------------------------------|-------------------|
| Empirical formula                 | C <sub>35</sub> H <sub>46</sub> O <sub>2</sub> |                   |
| Formula weight                    | 498.72                                         |                   |
| Temperature                       | 296(2) K                                       |                   |
| Wavelength                        | 0.71073 Å                                      |                   |
| Crystal system                    | Triclinic                                      |                   |
| Space group                       | P-1                                            |                   |
| Unit cell dimensions              | a = 10.448(9) Å                                | α = 111.204(17)°. |
|                                   | b = 11.226(9) Å                                | β = 98.515(18)°.  |
|                                   | c = 14.378(12) Å                               | γ = 95.224(19)°.  |
| Volume                            | 1536(2) Å <sup>3</sup>                         |                   |
| Z                                 | 2                                              |                   |
| Density (calculated)              | 1.078 Mg/m <sup>3</sup>                        |                   |
| Absorption coefficient            | 0.065 mm <sup>-1</sup>                         |                   |
| F(000)                            | 544                                            |                   |
| Crystal size                      | 0.200 x 0.200 x 0.200 mm <sup>3</sup>          |                   |
| Theta range for data collection   | 2.575 to 25.000°.                              |                   |
| Index ranges                      | -12 ≤ h ≤ 12, -13 ≤ k ≤ 13, -17 ≤ l ≤ 17       |                   |
| Reflections collected             | 31939                                          |                   |
| Independent reflections           | 5398 [R(int) = 0.1473]                         |                   |
| Completeness to theta = 25.000°   | 99.6 %                                         |                   |
| Absorption correction             | Semi-empirical from equivalents                |                   |
| Refinement method                 | Full-matrix least-squares on F <sup>2</sup>    |                   |
| Data / restraints / parameters    | 5398 / 0 / 346                                 |                   |
| Goodness-of-fit on F <sup>2</sup> | 1.035                                          |                   |
| Final R indices [I > 2σ(I)]       | R1 = 0.0965, wR2 = 0.2324                      |                   |
| R indices (all data)              | R1 = 0.2475, wR2 = 0.2933                      |                   |
| Extinction coefficient            | n/a                                            |                   |
| Largest diff. peak and hole       | 0.266 and -0.236 e.Å <sup>-3</sup>             |                   |

## 2. Experimental Section

### General Information

All reagents and all solvents were purchased from commercial suppliers, and were used without further purification. The progress of reactions was monitored by TLC. For chromatographic purifications, 200-300 mesh silica gel was used.  $^1\text{H}$  (400 MHz) and  $^{13}\text{C}$  (101 MHz) NMR spectra were recorded with tetramethylsilane as an internal standard. HRMS measurements were carried out using the ESI ionization technique with an FT-ICR analyzer. Data are reported as follows: chemical shift, multiplicity (s = singlet, d = doublet, t = triplet, q = quartet, m = multiplet), coupling constants (Hz) and integration. CCDC (for **2a**) contains the supplementary crystallographic data for this paper. These data can be obtained free of charge from The Cambridge Crystallographic Data Centre.

### General Procedure for the Synthesis of *p*-quinone methide **1a-1x**.

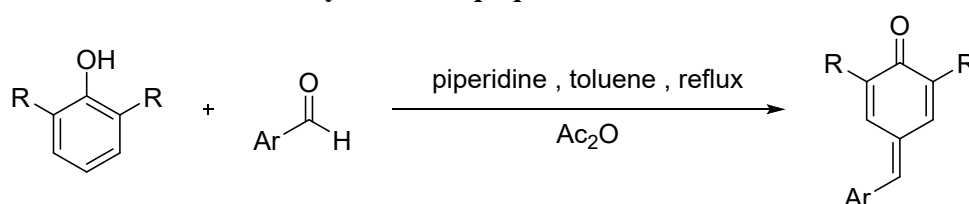

In a Dean-Stark apparatus, a solution of phenols (25.0 mmol) and the corresponding aldehydes (25.0 mmol) in toluene (100 mL) was heated to reflux. Piperidine (50.0 mmol, 4.94 mL) was dropwise added within 1 h. The reaction mixture was continued to reflux for 12 h. After cooling just below the boiling point of the reaction mixture, acetic anhydride (50.0 mmol, 2.55g) was added and stirring was continued for 15 min. Then the reaction mixture was poured on ice-water (500 mL) and extracted with CH<sub>2</sub>Cl<sub>2</sub> (4 x 200 mL). The combined organic phases were dried over anhydrous Na<sub>2</sub>SO<sub>4</sub>, and the solvent of the filtrate was removed under reduced pressure. The crude products were purified by flash column chromatography and further recrystallized from n-hexane, affording the desired *p*-QMs **1a-1x**.<sup>[1]</sup>

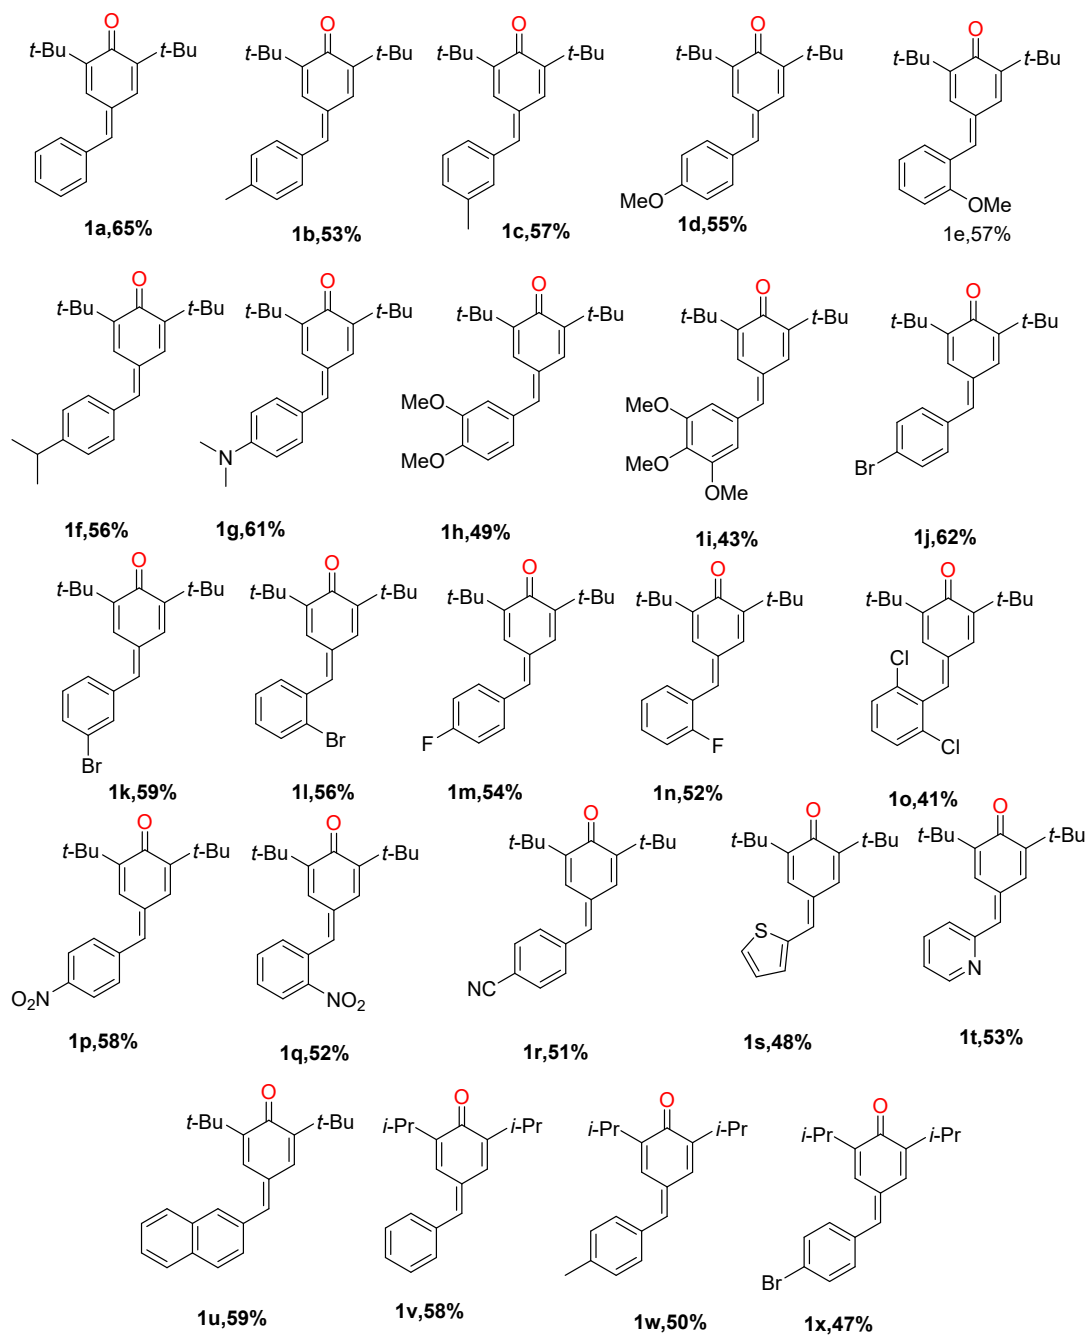

### General Procedure for the Synthesis of 2a-2x

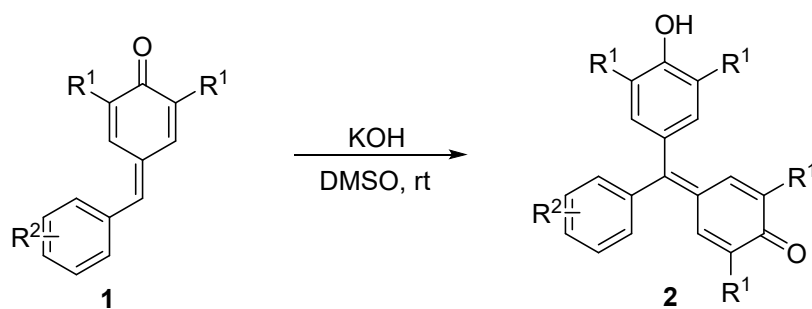

Unless otherwise noted, A dried 10 mL round flask was charged with DMSO

(2.0 ml), *p*-quinone methide (1.0 mmol), and KOH (1.0 mmol), and the mixture is stirred at room temperature until the reaction is complete. After the completion of reaction as was indicated by TLC monitoring. Dilute the mixed species with water and ethyl acetate and continue stirring for 30 minutes, separation. Then the mixture was extracted with EtOAc, and dried over anhydrous Na<sub>2</sub>SO<sub>4</sub>. The solvent of the filtrate was removed under the reduced pressure. The crude product was purified by flash column chromatography on silica gel to give the desired product **2a-2x**. **1g** reacted for 12 hours at room temperature, and then for 12 hours at 65 °C to afford **2g**.

### Gram scale synthesis method of **2a** and **2i**

A dried 50 mL round flask was charged with DMSO (10 ml), *p*-quinone methide (5 mmol, 1.47 g), and KOH (5 mmol), and the mixture was stirred at room temperature until the reaction is complete. After the completion of reaction as was indicated by TLC monitoring. Dilute the mixed species with water and ethyl acetate and continue stirring for 30 minutes, separation. Then the mixture was extracted with EtOAc, and dried over anhydrous Na<sub>2</sub>SO<sub>4</sub>. The solvent of the filtrate was removed under the reduced pressure. The crude product was purified by flash column chromatography on silica gel to give the desired product **2a** (0.997g, 80%). Similar result was obtained when *p*-QM **1i** (1.92 g) was used and the desired **2i** was furnished in 62% yield (0.913g).

### General Procedure for the Synthesis of **2a-2ar**

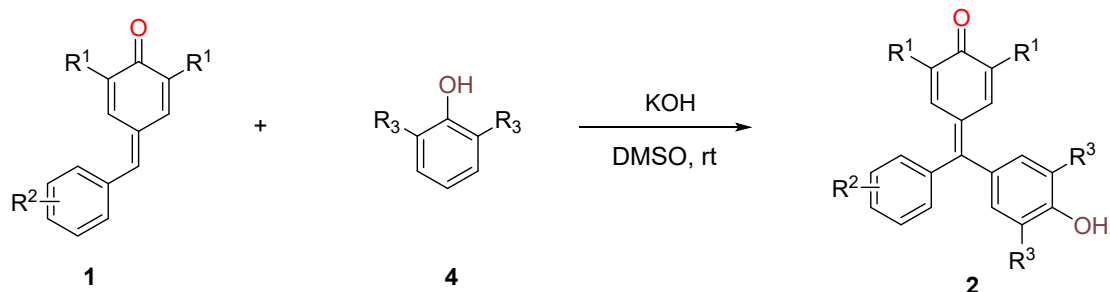

Unless otherwise noted, A dried 10 mL round flask was charged with DMSO (2.0 ml), *p*-quinone methide (1.0 mmol), phenol (1.0 mmol) and KOH (1.0 mmol), and the mixture is stirred at room temperature until the reaction is complete. After the completion of reaction as was indicated by TLC monitoring. Dilute the mixed species with water and ethyl acetate and continue stirring for 30 minutes, separation. Then the mixture was extracted with EtOAc, and dried over anhydrous Na<sub>2</sub>SO<sub>4</sub>. The solvent of the filtrate was removed under the reduced pressure. The crude product was purified by flash column chromatography on silica gel to give the desired product **2a-2ar**.

### Reference

- 1 (a) D. Wang, Z. F. Song, W. J. Wang and T. Xu, *Org. Lett.*, 2019, **21**, 3963–3967; (b) M. L. Ke and Q. L. Song, *Adv. Synth. Catal.*, 2017, **359**, 384–389; (c) K. G. Ghosh, P. Chandu, S. Mondal and D. Sureshkumar, *Tetrahedron*, 2019, **75**, 4471–4478; (d)

W. D. Chu, L. F. Zhang, X. Bao, X. H. Zhao, C. Zeng, J. Y. Du, G. B. Zhang, F. X. Wang, X. Y. Ma and C. A. Fan, *Angew. Chem. Int. Ed.*, 2013, **52**, 9229–9233.

### 3. Characterization data for all products.

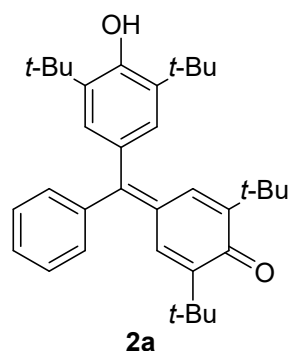

**2,6-di-tert-butyl-4-((3,5-di-tert-butyl-4-hydroxyphenyl)(phenyl)methylene)cyclohexa-2,5-dien-1-one (2a)** 92%(one step), 59.8% (two steps)(**path-a**); 88%(one step), 57.2% (two steps) (**path-b**): orange solid. m.p.:222.6-228.0 °C. <sup>1</sup>H NMR (400 MHz, CDCl<sub>3</sub>) δ 7.50 – 7.40 (m, 3H), 7.35 – 7.26 (m, 3H), 7.16 (d, *J* = 2.4 Hz, 1H), 7.07 (s, 2H), 5.56 (s, 1H), 1.44 (s, 18H), 1.33 (s, 9H), 1.27 (s, 9H). <sup>13</sup>C NMR (101 MHz, CDCl<sub>3</sub>) δ 186.17, 158.39, 155.54, 146.73, 146.55, 141.22, 135.24, 132.76, 132.69, 132.36, 131.95, 130.15, 129.20, 128.74, 127.80, 120.89, 35.36, 35.27, 34.44, 30.34, 29.75, 29.57, 29.45. HRMS: calcd. for C<sub>35</sub>H<sub>46</sub>O<sub>2</sub> [M+H]<sup>+</sup> 499.3570; found 499.3571.

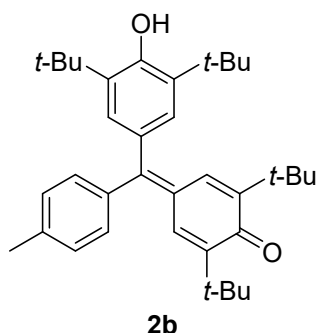

**2,6-di-tert-butyl-4-((3,5-di-tert-butyl-4-hydroxyphenyl)(p-tolyl)methylene)cyclohexa-2,5-dien-1-one(2b)** 75%(one step), 39.8%(two steps) (**path-a**); 77%(one step), 40.8%(two steps)(**path-b**): orange solid. m.p.:263.6-282.2 °C. <sup>1</sup>H NMR (400 MHz, CDCl<sub>3</sub>) δ 7.24 (d, *J* = 2.5 Hz, 1H), 7.18 (q, *J* = 8.2 Hz, 5H), 7.03 (s, 2H), 5.51 (s, 1H), 2.43 (s, 3H), 1.47 – 1.18 (m, 37H). <sup>13</sup>C NMR (101 MHz, CDCl<sub>3</sub>) δ 186.09, 158.77, 155.49, 146.40, 146.31, 139.44, 138.19, 135.15, 132.89, 132.81, 132.53, 132.06, 130.20, 128.52, 128.49, 35.28, 35.22, 34.39, 30.33, 29.71, 29.59. HRMS: calcd. for C<sub>36</sub>H<sub>48</sub>O<sub>2</sub> [M+H]<sup>+</sup> 513.3727; found 513.3722.



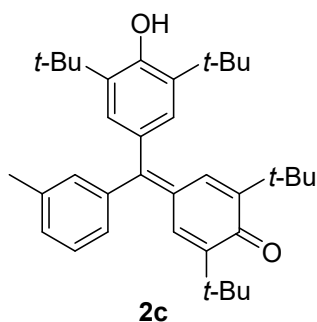

**2,6-di-tert-butyl-4-((3,5-di-tert-butyl-4-hydroxyphenyl)(m-tolyl)methylene)cyclohexa-2,5-dien-1-one(2c)** 85%(one step), 48.5%(two steps) (**path-a**); 87%(one step), 50%(two steps) (**path-b**): orange solid. m.p.:265.7-285.4 °C. <sup>1</sup>H NMR (400 MHz, CDCl<sub>3</sub>) δ 7.30 – 7.20 (m, 3H), 7.19 – 6.99 (m, 5H), 5.54 (s, 1H), 2.38 (s, 3H), 1.41 (s, 18H), 1.33 – 1.21 (m, 18H). <sup>13</sup>C NMR (101 MHz, CDCl<sub>3</sub>) δ 186.18, 158.83, 146.61, 146.31, 141.07, 137.31, 135.18, 133.12, 132.88, 131.93, 130.21, 130.04, 129.67, 128.75, 128.69, 127.66, 35.23, 34.46, 30.34, 29.77, 29.61. HRMS: calcd. for C<sub>36</sub>H<sub>48</sub>O<sub>2</sub> [M+H]<sup>+</sup> 513.3727; found 513.3722.

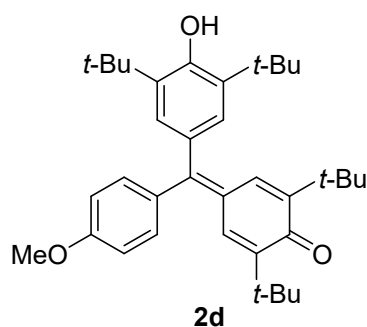

**2,6-di-tert-butyl-4-((3,5-di-tert-butyl-4-hydroxyphenyl)(4-methoxyphenyl)methylene)cyclohexa-2,5-dien-1-one(2d)** 81%(one step), 44.6%(two steps) (**path-a**); 79%(one step), 43.5%(two steps) (**path-b**): orange solid. m.p.:277.1-290.1 °C. <sup>1</sup>H NMR (400 MHz, CDCl<sub>3</sub>) δ 7.21 (t, *J* = 8.4 Hz, 4H), 7.03 (s, 2H), 6.93 (d, *J* = 8.7 Hz, 2H), 5.54 (s, 1H), 3.88 (s, 3H), 1.41 (s, 18H), 1.27 (d, *J* = 8.0 Hz, 18H). <sup>13</sup>C NMR (101 MHz, CDCl<sub>3</sub>) δ 186.03, 160.72, 158.78, 155.67, 146.18, 135.19, 134.41, 133.48, 133.10, 132.96, 132.09, 130.42, 128.16, 113.26, 55.40, 35.32, 35.28, 34.44, 30.38, 29.76, 29.65. HRMS: calcd. for C<sub>36</sub>H<sub>48</sub>O<sub>3</sub> [M+H]<sup>+</sup> 529.3676; found 529.3676.

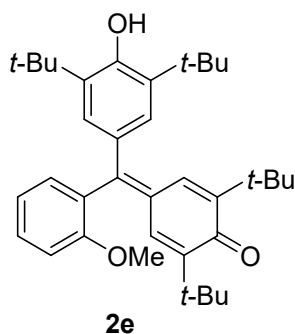

**2,6-di-tert-butyl-4-((3,5-di-tert-butyl-4-hydroxyphenyl)(2-methoxyphenyl)methylene)cyclohexa-2,5-dien-1-one(2e)** 49%(one step), 27.9%(two steps) (**path-a**); 57%(one step), 27.9%(two steps) (**path-b**): orange solid. m.p.:277.1-290.1 °C. <sup>1</sup>H NMR (400 MHz, CDCl<sub>3</sub>) δ 7.21 (t, *J* = 8.4 Hz, 4H), 7.03 (s, 2H), 6.93 (d, *J* = 8.7 Hz, 2H), 5.54 (s, 1H), 3.88 (s, 3H), 1.41 (s, 18H), 1.27 (d, *J* = 8.0 Hz, 18H). <sup>13</sup>C NMR (101 MHz, CDCl<sub>3</sub>) δ 186.03, 160.72, 158.78, 155.67, 146.18, 135.19, 134.41, 133.48, 133.10, 132.96, 132.09, 130.42, 128.16, 113.26, 55.40, 35.32, 35.28, 34.44, 30.38, 29.76, 29.65. HRMS: calcd. for C<sub>36</sub>H<sub>48</sub>O<sub>3</sub> [M+H]<sup>+</sup> 529.3676; found 529.3676.

p), 32.5%(two steps) (**path-b**): orange solid. m.p.:284.3-300.9 °C. <sup>1</sup>H NMR (400 MHz, CDCl<sub>3</sub>) δ 7.21 (t, *J* = 8.4 Hz, 4H), 7.03 (s, 2H), 6.93 (d, *J* = 8.7 Hz, 2H), 5.54 (s, 1H), 3.88 (s, 3H), 1.41 (s, 18H), 1.27 (d, *J* = 8.0 Hz, 18H). <sup>13</sup>C NMR (101 MHz, CDCl<sub>3</sub>) δ 186.03, 160.72, 158.78, 155.67, 146.18, 135.19, 134.41, 133.48, 133.10, 132.96, 132.09, 130.42, 128.16, 113.26, 55.40, 35.32, 35.28, 34.44, 30.38, 29.76, 29.65. HRMS: calcd. for C<sub>36</sub>H<sub>48</sub>O<sub>3</sub> [M+H]<sup>+</sup> 529.3676; found 529.3676.

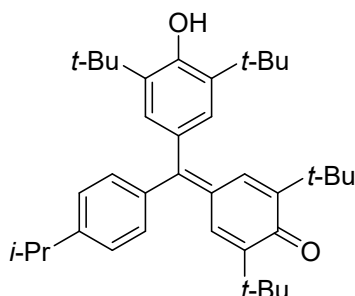

**2f**

**2,6-di-tert-butyl-4-((3,5-di-tert-butyl-4-hydroxyphenyl)(4-isopropylphenyl)methylene)cyclohexa-2,5-dien-1-one(2f)** 70%(one step), 39.2%(two steps) (**path-a**); 74%(one step), 41.4%(two steps) (**path-b**): orange solid. m.p.:240.6-252.1 °C. <sup>1</sup>H NMR (400 MHz, CDCl<sub>3</sub>) δ 7.21 (t, *J* = 8.4 Hz, 4H), 7.03 (s, 2H), 6.93 (d, *J* = 8.7 Hz, 2H), 5.54 (s, 1H), 3.88 (s, 3H), 1.41 (s, 18H), 1.27 (d, *J* = 8.0 Hz, 18H). <sup>13</sup>C NMR (101 MHz, CDCl<sub>3</sub>) δ 186.03, 160.72, 158.78, 155.67, 146.18, 135.19, 134.41, 133.48, 133.10, 132.96, 132.09, 130.42, 128.16, 113.26, 55.40, 35.32, 35.28, 34.44, 30.38, 29.76, 29.65. HRMS: calcd. for C<sub>38</sub>H<sub>52</sub>O<sub>2</sub> [M+H]<sup>+</sup> 541.4040; found 541.4039.

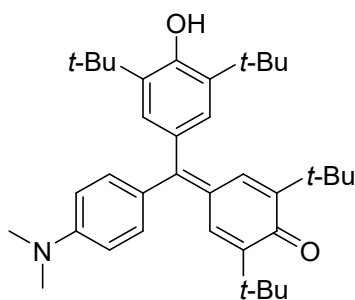

**2g**

**2,6-di-tert-butyl-4-((3,5-di-tert-butyl-4-hydroxyphenyl)(4-(dimethylamino)phenyl)methylene)cyclohexa-2,5-dien-1-one(2g)** 50%(one step), 30.5%(**path-a**); 61%(two steps) (one step), 37.2%(two steps) (**path-b**): orange solid. m.p.:251.4-270.0 °C. <sup>1</sup>H NMR (400 MHz, CDCl<sub>3</sub>) δ 7.48 – 7.02 (m, 6H), 6.73 (d, *J* = 8.7 Hz, 2H), 5.56 (s, 1H), 3.11 (s, 6H), 1.35 (d, *J* = 38.4 Hz, 36H). <sup>13</sup>C NMR (101 MHz, CDCl<sub>3</sub>) δ 185.09, 160.64, 155.59, 151.33, 145.35, 135.07, 133.44, 130.68, 128.20, 110.82, 77.00, 40.23, 40.22, 34.98, 34.51, 30.30, 29.96. HRMS: calcd. for C<sub>38</sub>H<sub>52</sub>O<sub>2</sub> [M+H]<sup>+</sup> 541.4040; found 541.4039.

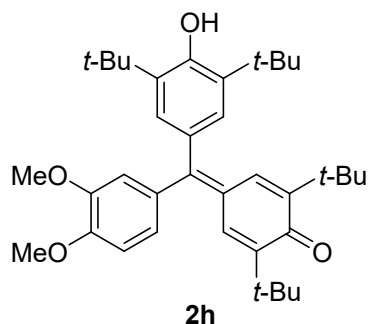

**2,6-di-tert-butyl-4-((3,5-di-tert-butyl-4-hydroxyphenyl)(3,4-dimethoxyphenyl)methylene)cyclohexa-2,5-dien-1-one(2h)** 72%(one step), 35.3%(two steps) (**path-a**); 72%(one step), 35.3%(two steps) (**path-b**): orange solid. m.p.:260.6-268.0 °C. <sup>1</sup>H NMR (400 MHz, CDCl<sub>3</sub>) δ 7.22 (d, J = 3.4 Hz, 2H), 7.06 (s, 2H), 6.95 – 6.79 (m, 3H), 5.54 (s, 1H), 3.98 (s, 3H), 3.84 (s, 3H), 1.42 (s, 18H), 1.28 (d, J = 7.2 Hz, 18H). <sup>13</sup>C NMR (101 MHz, CDCl<sub>3</sub>) δ 186.03, 160.72, 158.78, 155.67, 146.18, 135.19, 134.41, 133.48, 133.10, 132.96, 132.09, 130.42, 128.16, 113.26, 55.40, 35.32, 35.28, 34.44, 30.38, 29.76, 29.65. HRMS: calcd. for C<sub>37</sub>H<sub>50</sub>O<sub>4</sub> [M+H]<sup>+</sup> 559.3782; found 559.3776.

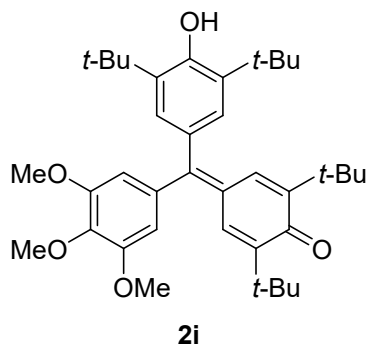

**2,6-di-tert-butyl-4-((3,5-di-tert-butyl-4-hydroxyphenyl)(3,4,5-trimethoxyphenyl)methylene)cyclohexa-2,5-dien-1-one(2i)** 73%(one step), 31.4% (two steps) (**path-a**); 78%(one step), 33.5%(two steps) (**path-b**): orange solid. m.p.:280.5-296.5 °C. <sup>1</sup>H NMR (400 MHz, CDCl<sub>3</sub>) δ 7.23 (s, 2H), 7.07 (s, 2H), 6.50 (s, 2H), 5.56 (s, 1H), 3.97 (s, 3H), 3.81 (s, 6H), 1.43 (s, 18H), 1.28 (d, J = 8.1 Hz, 18H). <sup>13</sup>C NMR (101 MHz, CDCl<sub>3</sub>) δ 186.14, 158.21, 155.70, 152.41, 146.56, 146.33, 139.20, 136.46, 135.22, 132.94, 132.65, 131.46, 130.35, 128.65, 110.40, 61.09, 56.34, 35.30, 35.24, 34.42, 30.35, 29.69. HRMS: calcd. for C<sub>38</sub>H<sub>52</sub>O<sub>5</sub> [M+H]<sup>+</sup> 589.3887; found 589.3882.

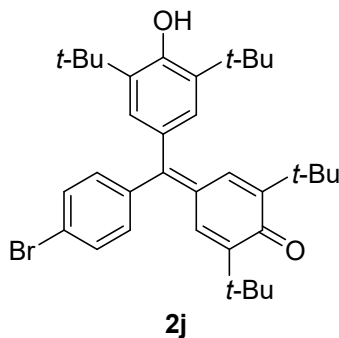

**4-((4-bromophenyl)(3,5-di-tert-butyl-4-hydroxyphenyl)methylene)-2,6-di-tert-butylcyclohexa-2,5-dien-1-one(2j)**

*yclohexa-2,5-dien-1-one(2j)* 86%(one step), 53.3%(two steps) (**path-a**); 91%(one step), 56.4%(two steps) (**path-b**): orange solid. m.p.:264.4-272.2 °C. <sup>1</sup>H NMR (400 MHz, CDCl<sub>3</sub>) δ 7.59 – 7.49 (m, 2H), 7.23 (d, J = 2.6 Hz, 1H), 7.20 – 7.13 (m, 2H), 7.08 (d, J = 2.5 Hz, 1H), 7.01 (s, 2H), 5.55 (s, 1H), 1.42 (s, 18H), 1.27 (d, J = 13.8 Hz, 18H). <sup>13</sup>C NMR (101 MHz, CDCl<sub>3</sub>) δ 186.10, 156.55, 155.72, 146.97, 140.12, 135.44, 133.92, 132.69, 132.11, 131.50, 131.14, 130.13, 129.05, 123.80, 35.35, 34.47, 30.36, 29.75, 29.64. HRMS: calcd. for C<sub>35</sub>H<sub>45</sub>BrO<sub>2</sub> [M+H]<sup>+</sup> 579.2657; found 579.2651.

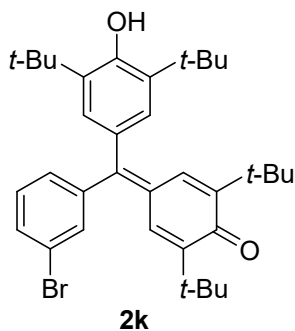

*4-((3-bromophenyl)(3,5-di-tert-butyl-4-hydroxyphenyl)methylene)-2,6-di-tert-butylcyclohexa-2,5-dien-1-one(2k)* 76%(one step), 44.8%(two steps) (**path-a**); 74%(one step), 43.7%(two steps) (**path-b**): orange solid. m.p.:268.5-273.6 °C. <sup>1</sup>H NMR (400 MHz, CDCl<sub>3</sub>) δ 7.59 – 7.51 (m, 1H), 7.45 (t, J = 1.7 Hz, 1H), 7.29 – 7.20 (m, 3H), 7.12 – 7.00 (m, 3H), 5.55 (s, 1H), 1.49 – 1.20 (m, 36H). <sup>13</sup>C NMR (101 MHz, CDCl<sub>3</sub>) δ 186.16, 155.91, 155.76, 147.20, 147.05, 143.29, 135.86, 135.49, 134.99, 132.55, 132.08, 131.49, 131.31, 130.93, 130.56, 130.36, 130.08, 129.86, 129.38, 126.13, 124.48, 122.04, 35.43, 35.35, 34.49, 30.38, 29.78, 29.60. HRMS: calcd. for C<sub>35</sub>H<sub>45</sub>BrO<sub>2</sub> [M+H]<sup>+</sup> 579.2657; found 579.2651.

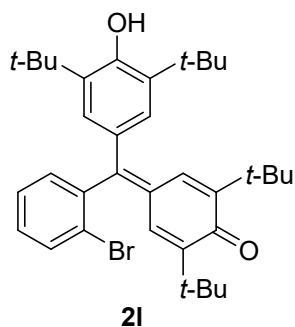

*4-((2-bromophenyl)(3,5-di-tert-butyl-4-hydroxyphenyl)methylene)-2,6-di-tert-butylcyclohexa-2,5-dien-1-one(2l)* 71%(one step), 39.8%(two steps) (**path-a**); 70%(one step), 30.2%(two steps) (**path-b**): orange solid. m.p.:270.5-277.0 °C. <sup>1</sup>H NMR (400 MHz, CD<sub>3</sub>OD) δ 7.67 (d, J = 8.0 Hz, 1H), 7.53 – 7.17 (m, 4H), 7.08 (s, 2H), 6.76 (s, 1H), δ 3.33 (s, 1H), 1.56 – 1.04 (m, 36H). <sup>13</sup>C NMR (101 MHz, CD<sub>3</sub>OD) δ 186.77, 156.28, 155.63, 147.33, 146.70, 141.74, 136.19, 132.91, 132.35, 132.14, 131.99, 129.80, 129.75, 129.06, 128.94, 126.94, 123.77, 35.24, 34.90, 34.34, 29.88, 29.43, 29.10. HRMS: calcd. for C<sub>35</sub>H<sub>45</sub>BrO<sub>2</sub> [M+H]<sup>+</sup> 579.2657; found 579.2651.

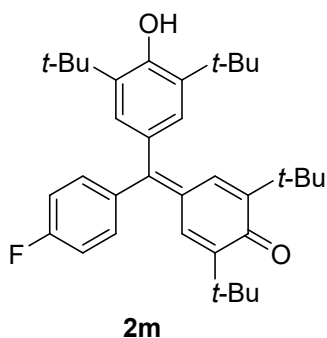

**2,6-di-tert-butyl-4-((3,5-di-tert-butyl-4-hydroxyphenyl)(4-fluorophenyl)methylene)cyclohexa-2,5-dien-1-one(2m)** 87%(one step), 47.0%(two steps) (**path-a**); 89%(one step), 48.1%(two steps) (**path-b**): orange solid. m.p.:260.7-264.2 °C. <sup>1</sup>H NMR (400 MHz, CDCl<sub>3</sub>) δ 7.29 – 7.21 (m, 3H), 7.15 – 7.05 (m, 3H), 7.02 (s, 2H), 5.54 (s, 1H), 1.41 (s, 18H), 1.27 (d, J = 16.3 Hz, 18H). <sup>13</sup>C NMR (101 MHz, CDCl<sub>3</sub>) δ 186.07, 164.51, 162.03, 156.78, 155.62, 146.82, 146.77, 137.26, 137.23, 135.37, 134.22, 134.14, 132.61, 132.23, 131.75, 130.05, 128.82, 115.08, 114.87, 35.31, 35.24, 34.40, 30.29, 29.68, 29.53. <sup>19</sup>F NMR (376 MHz, CDCl<sub>3</sub>) δ -111.44. HRMS: calcd. for C<sub>35</sub>H<sub>45</sub>FO<sub>2</sub> [M+H]<sup>+</sup> 517.3476; found 517.3477.

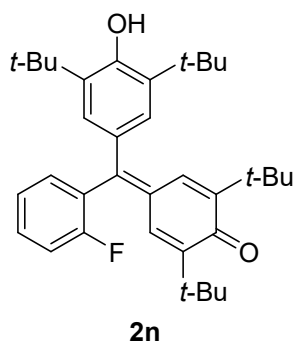

**2,6-di-tert-butyl-4-((3,5-di-tert-butyl-4-hydroxyphenyl)(2-fluorophenyl)methylene)cyclohexa-2,5-dien-1-one(2n)** 71%(one step), 36.9%(two steps) (**path-a**); 75%(one step), 39.0%(two steps) (**path-b**): orange solid. m.p.:279.7-281.1 °C. <sup>1</sup>H NMR (400 MHz, CDCl<sub>3</sub>) δ 7.43 – 7.33 (m, 2H), 7.23 – 7.11 (m, 3H), 7.06 (s, 2H), 6.93 (t, J = 2.4 Hz, 1H), 5.50 (s, 1H), 1.41 (s, 18H), 1.26 (d, J = 35.4 Hz, 18H). <sup>13</sup>C NMR (101 MHz, CDCl<sub>3</sub>) δ 186.43, 163.46, 159.86, 156.27, 151.68, 148.87, 148.36, 135.45, 133.15, 131.88, 131.72, 131.04, 130.97, 130.89, 129.83, 128.98, 128.83, 128.68, 123.86, 123.83, 115.95, 115.73, 35.26, 33.76, 30.78, 29.78, 28.05. <sup>19</sup>F NMR (376 MHz, CDCl<sub>3</sub>) δ -112.02. HRMS: calcd. for C<sub>35</sub>H<sub>45</sub>FO<sub>2</sub> [M+H]<sup>+</sup> 517.3476; found 517.3477.

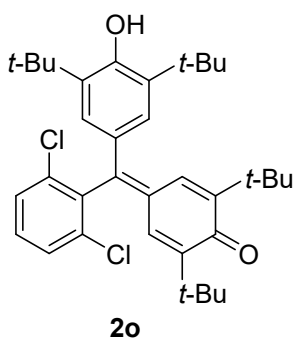

**2,6-di-tert-butyl-4-((3,5-di-tert-butyl-4-hydroxyphenyl)(2,6-dichlorophenyl)methylene)cyclohexa-2,5-dien-1-one(2o)** 40%(one step), 16.4% (two steps) (**path-a**); 82%(one step), 33.6%(two steps) (**path-b**): orange solid. m.p.:256.7-264.1<sup>o</sup>C. <sup>1</sup>H NMR (400 MHz, CDCl<sub>3</sub>) δ 7.54 (s, 1H), 7.40 – 7.32 (m, 2H), 7.21 (d, *J* = 8.2 Hz, 1H), 7.06 (s, 2 H), 6.74 (s, 1H), 5.53 (s, 1H), 1.44 (s, 18H), 1.33 (s, 9H), 1.23 (s, 9H). <sup>13</sup>C NMR (101 MHz, CDCl<sub>3</sub>) δ 186.45, 155.39, 151.68, 147.85, 147.47, 138.53, 135.61, 134.89, 134.87, 133.10, 131.29, 131.22, 129.99, 129.79, 129.76, 128.81, 126.91, 35.49, 35.22, 34.45, 30.30, 29.75, 29.51. HRMS: calcd. for C<sub>35</sub>H<sub>44</sub>Cl<sub>2</sub>O<sub>2</sub> [M+H]<sup>+</sup> 567.2791; found 567.2787.

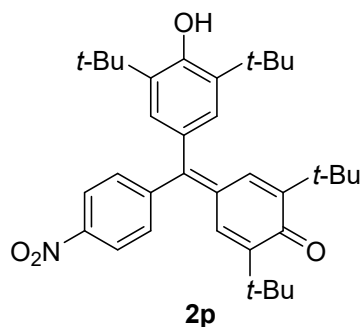

**2,6-di-tert-butyl-4-((3,5-di-tert-butyl-4-hydroxyphenyl)(4-nitrophenyl)methylene)cyclohexa-2,5-dien-1-one(2p)** 80%(one step), 46.4%(two steps) (**path-a**); 74%(one step), 42.9%(two steps) (**path-b**): orange solid. m.p.:239.6-251.7 <sup>o</sup>C. <sup>1</sup>H NMR (400 MHz, CDCl<sub>3</sub>) δ 8.28 (d, *J* = 8.4 Hz, 2H), 7.47 (d, *J* = 8.4 Hz, 2H), 7.25 (d, *J* = 2.5 Hz, 1H), 6.97 (d, *J* = 4.3 Hz, 3H), 5.59 (s, 1H), 1.41 (s, 18H), 1.28 (s, 9H), 1.22 (s, 9H). <sup>13</sup>C NMR (101 MHz, CDCl<sub>3</sub>) δ 186.13, 155.84, 154.11, 148.05, 147.85, 147.81, 147.76, 135.74, 132.93, 132.20, 131.28, 130.93, 130.20, 129.86, 123.11, 35.47, 35.39, 34.49, 30.29, 29.71, 29.54. HRMS: calcd. for C<sub>35</sub>H<sub>45</sub>NO<sub>4</sub> [M+H]<sup>+</sup> 544.3421; found 544.3422.

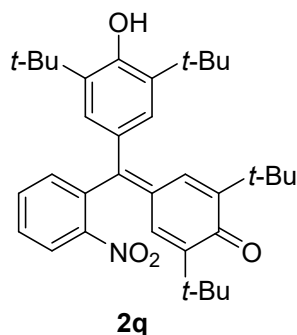

**2,6-di-tert-butyl-4-((3,5-di-tert-butyl-4-hydroxyphenyl)(2-nitrophenyl)methylene)cyclohexa-2,5-dien-1-one(2q)** 69%(one step), 35.9%(two steps) (**path-a**); 88%(one step), 45.8%(two steps) (**path-b**): orange solid. m.p.:241.3-254.7 <sup>o</sup>C. <sup>1</sup>H NMR (400 MHz, CDCl<sub>3</sub>) δ 7.45 – 7.33 (m, 2H), 7.24 – 7.09 (m, 3H), 7.06 (s, 2H), 6.93 (t, *J* = 2.5 Hz, 1H), 5.50 (s, 1H), 1.41 (s, 18H), 1.26 (d, *J* = 35.3 Hz, 18H). <sup>13</sup>C NMR (101 MHz, CDCl<sub>3</sub>) δ 186.45, 161.32, 158.84, 155.42, 150.41, 147.25, 147.04, 135.46, 133.17, 131.88, 131.73, 131.05, 130.98, 130.90, 129.84, 128.99, 128.83, 128.69, 123.87, 123.84, 115.96, 115.74, 35.44, 35.21, 34.45, 30.32, 29.77, 29.52. HRMS: calcd. for C<sub>35</sub>H<sub>45</sub>NO<sub>4</sub> [M+H]<sup>+</sup> 544.3421; found 544.3422.

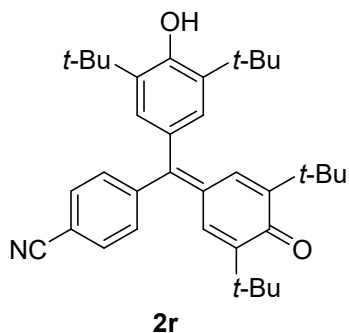

**2,6-di-tert-butyl-4-((3,5-di-tert-butyl-4-hydroxyphenyl)(4-isocyanophenyl)methylene)cyclohexa-2,5-dien-1-one(2r)** 62%(one step), 31.6%(two steps) (**path-a**); 57% (one step), 29.1%(two steps) (**path-b**): orange solid. m.p.:293.9-301.1<sup>o</sup>C. <sup>1</sup>H NMR (400 MHz, CDCl<sub>3</sub>) δ 7.77 – 7.67 (m, 2H), 7.45 – 7.33 (m, 2H), 7.29 – 7.23 (m, 1H), 7.00 – 6.87 (m, 3H), 5.56 (s, 1H), 1.41 (s, 18H), 1.25 (d, J = 21.6 Hz, 18H). <sup>13</sup>C NMR (101 MHz, CDCl<sub>3</sub>) δ 186.06, 155.70, 154.52, 147.73, 147.62, 146.04, 135.67, 132.60, 132.12, 131.57, 131.28, 130.95, 129.86, 129.78, 118.61, 112.45, 35.40, 35.32, 34.42, 30.25, 29.65, 29.48. HRMS: calcd. for C<sub>36</sub>H<sub>45</sub>NO<sub>2</sub> [M+H]<sup>+</sup> 524.3523; found 524.3525.

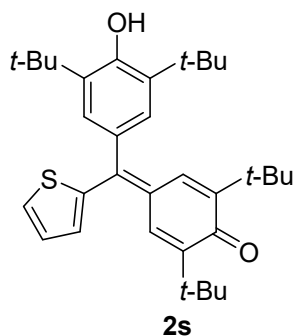

**2,6-di-tert-butyl-4-((3,5-di-tert-butyl-4-hydroxyphenyl)(thiophen-2-yl)methylene)cyclohexa-2,5-dien-1-one(2s)** 53%(one step), 25.4%(two steps) (**path-a**); 72%(one step), 34.6%(two steps) (**path-b**): orange solid. m.p.:233.9-242.0 <sup>o</sup>C. <sup>1</sup>H NMR (400 MHz, CDCl<sub>3</sub>) δ 7.60 (d, J = 5.0 Hz, 2H), 7.22 (d, J = 2.8 Hz, 1H), 7.18 – 7.08 (m, 4H), 5.55 (s, 1H). <sup>13</sup>C NMR (101 MHz, CDCl<sub>3</sub>) δ 186.15, 155.84, 149.86, 146.93, 146.45, 144.16, 135.15, 133.57, 132.78, 131.99, 131.76, 131.07, 130.14, 128.92, 127.55, 35.44, 35.36, 34.47, 30.38, 29.71. HRMS: calcd. for C<sub>33</sub>H<sub>44</sub>O<sub>2</sub>S [M+H]<sup>+</sup> 505.3135; found 53136.

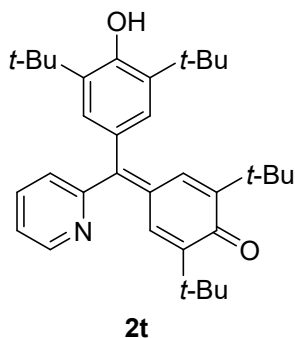

**2,6-di-tert-butyl-4-((3,5-di-tert-butyl-4-hydroxyphenyl)(pyridin-2-yl)methylene)cyclohexa-2,5-dien-1-one(2t)** 66%(one step), 35.0%(two steps) (**path-a**); 72%(one step), 3

8.2%(two steps) (**path-b**): orange solid. m.p.:220.6-230.7 °C. <sup>1</sup>H NMR (400 MHz, CDCl<sub>3</sub>) δ 8.82 – 8.72 (m, 1H), 7.75 (td, J = 7.7, 1.7 Hz, 1H), 7.36 – 7.23 (m, 3H), 7.12 – 7.00 (m, 3H), 5.52 (s, 1H), 1.40 (s, 18H), 1.25 (d, J = 21.2 Hz, 18H). <sup>13</sup>C NMR (101 MHz, CDCl<sub>3</sub>) δ 186.31, 159.55, 155.45, 154.39, 149.50, 147.62, 147.11, 135.78, 135.43, 132.49, 131.96, 130.72, 130.06, 129.59, 127.52, 122.93, 35.38, 35.24, 34.39, 30.25, 29.68, 29.46. HRMS: calcd. for C<sub>35</sub>H<sub>45</sub>NO<sub>2</sub> [M+H]<sup>+</sup> 500.3523; found 500.3522.

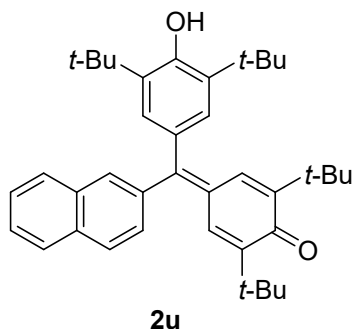

**2,6-di-tert-butyl-4-((3,5-di-tert-butyl-4-hydroxyphenyl)(naphthalen-2-yl)methylene)cyclohexa-2,5-dien-1-one(2u)** 83%(one step), 49.0%(two steps) (**path-a**); 85%(one step), 50.2%(two steps) (**path-b**): orange solid. m.p.:292.1.6-300.8 °C. <sup>1</sup>H NMR (400 MHz, CDCl<sub>3</sub>) δ 7.92 – 7.79 (m, 4H), 7.55 (tt, J = 6.9, 5.3 Hz, 2H), 7.39 – 7.28 (m, 2H), 7.28 – 7.18 (m, 1H), 7.08 (s, 2H), 5.54 (s, 1H), 1.40 (s, 18H), 1.27 (d, J = 38.0 Hz, 18 H). <sup>13</sup>C NMR (101 MHz, CDCl<sub>3</sub>) δ 186.19, 158.38, 155.70, 146.78, 138.53, 135.36, 133.59, 132.97, 132.88, 131.90, 130.35, 129.72, 129.30, 128.64, 127.85, 127.39, 127.20, 126.68, 35.44, 35.33, 34.49, 31.99, 30.40, 29.82, 29.67, 29.14. HRMS: calcd. for C<sub>39</sub>H<sub>48</sub>O<sub>2</sub> [M+H]<sup>+</sup> 549.3727; found 549.3721.

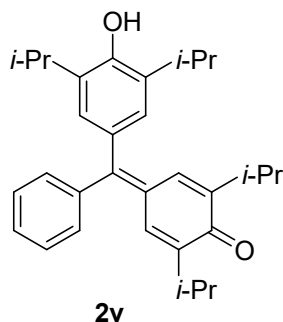

**4-((4-hydroxy-3,5-diisopropylphenyl)(phenyl)methylene)-2,6-diisopropylcyclohexa-2,5-dien-1-one(2v)** 30%(one step), 17.4%(two steps) (**path-a**); 85%(one step), 49.3%(two steps) (**path-b**): orange solid. m.p.:210.4-213.8 °C. <sup>1</sup>H NMR (400 MHz, CDCl<sub>3</sub>) δ 7.48 – 7.42 (m, 2H), 7.42 (d, J = 2.2 Hz, 1H), 7.24 (dd, J = 7.8, 2.2 Hz, 2H), 7.06 (s, 1H), 6.92 (s, 2H), 5.33 (s, 1H), 3.30 – 3.11 (m, 4H), 1.23 (d, J = 6.8 Hz, 12H), 1.10 (d, J = 6.9 Hz, 6H), 1.05 (d, J = 6.9 Hz, 6H). <sup>13</sup>C NMR (101 MHz, CDCl<sub>3</sub>) δ 186.19, 158.38, 155.70, 146.78, 138.53, 135.36, 133.59, 132.97, 132.88, 131.90, 130.35, 129.72, 129.30, 128.64, 127.85, 127.39, 127.20, 126.68, 35.44, 35.33, 34.49, 31.99, 30.40, 29.82, 29.67, 29.14. HRMS: calcd. for C<sub>31</sub>H<sub>38</sub>O<sub>2</sub> [M+H]<sup>+</sup> 443.2945; found 443.2950.



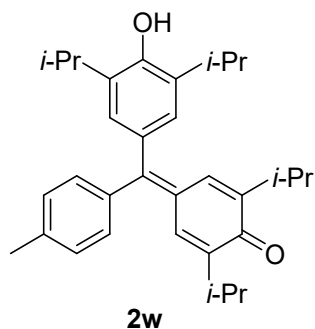

**4-((4-hydroxy-3,5-diisopropylphenyl)(p-tolyl)methylene)-2,6-diisopropylcyclohexa-2,5-dien-1-one(2w)** 34%(one step), 17.0%(two steps) (**path-a**); 65%(one step), 32.5%(two steps) (**path-b**): orange solid. m.p.:230.6-237.7 °C. <sup>1</sup>H NMR (400 MHz, CDCl<sub>3</sub>) δ 6.97 (d, J = 7.8 Hz, 2H), 6.90 (d, J = 8.1 Hz, 2H), 6.72 (s, 4H), 5.24 (s, 1H), 3.02 (p, J = 6.8 Hz, 4H), 2.22 (s, 3H), 1.09 (d, J = 7.0 Hz, 24H). <sup>13</sup>C NMR (101 MHz, CDCl<sub>3</sub>) δ 141.59, 135.43, 134.04, 131.80, 128.00, 127.65, 123.44, 26.20, 21.78, 21.68, 19.98. HRMS: calcd. for C<sub>31</sub>H<sub>40</sub>O<sub>2</sub> [M+H]<sup>+</sup> 457.3101; found 457.3108.

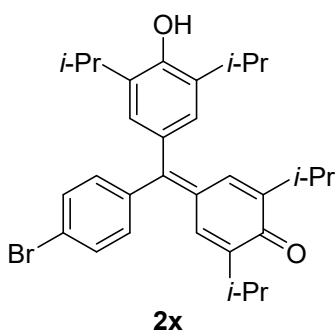

**4-((4-bromophenyl)(4-hydroxy-3,5-diisopropylphenyl)methylene)-2,6-diisopropylcyclohexa-2,5-dien-1-one(2x)** 31%(one step), 14.6%(two steps) (**path-a**); 60%(one step), 28.2%(two steps) (**path-b**): orange solid. m.p.:243.5-251.1 °C. <sup>1</sup>H NMR (400 MHz, CDCl<sub>3</sub>) δ 7.58 – 7.47 (m, 1H), 7.33 – 7.24 (m, 2H), 6.94 – 6.85 (m, 2H), 6.68 (s, 3H), 5.23 (s, 1H), 3.12 – 2.93 (m, 4H), 1.23 – 1.03 (m, 24H). <sup>13</sup>C NMR (101 MHz, CDCl<sub>3</sub>) δ 183.86, 153.50, 147.20, 143.80, 138.91, 136.24, 134.56, 132.29, 130.38, 130.36, 130.02, 129.99, 128.46, 127.83, 125.67, 123.35, 118.60, 26.19, 26.16, 21.76, 21.68. HRM S: calcd. for C<sub>31</sub>H<sub>37</sub>BrO<sub>2</sub> [M+H]<sup>+</sup> 523.2031; found 523.2028.

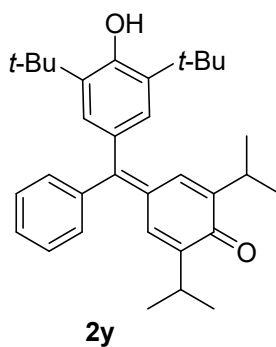

**4-((3,5-di-tert-butyl-4-hydroxyphenyl)(phenyl)methylene)-2,6-diisopropylcyclohexa-2,5-dien-1-one(2y)** 90%(one step), 58.5%(two steps): orange solid. m.p.:244.3-251.2 °C. <sup>1</sup>H NMR (400 MHz, CDCl<sub>3</sub>) δ 7.35 – 7.28 (m, 3H), 7.22 (d, J = 2.6 Hz, 1H), 7.19 – 7.14 (m, 2H), 7.06 (d, J = 2.6 Hz, 1H), 6.84 (s, 2H), 5.30 (s, 1H), 3.11 (p, J = 6.9 Hz, 2H), 1.22 – 1.11 (m, 30H). <sup>13</sup>C NMR (101 MHz, CDCl<sub>3</sub>) δ 186.21, 158.13, 151.71, 146.84, 146.17, 141.25, 133.31, 132.96, 132.68, 132.33, 129.23, 128.77, 128.60, 127.76, 35.30, 30.37, 29.72, 29.54, 27.13, 22.76. HRMS: calcd. for C<sub>33</sub>H<sub>42</sub>O<sub>2</sub> [M+H]<sup>+</sup> 471.3257; found 471.3252.

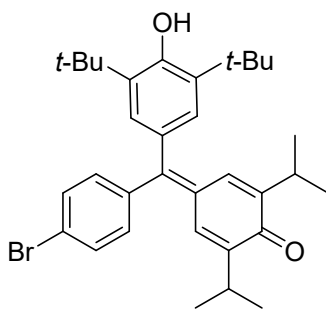

**2z**

**4-((4-bromophenyl)(3,5-di-tert-butyl-4-hydroxyphenyl)methylene)-2,6-diisopropylcyclohexa-2,5-dien-1-one(2z)** 86%(one step), 53.3%(two steps): orange solid. m.p.:249.8-253.3 °C. <sup>1</sup>H NMR (400 MHz, CDCl<sub>3</sub>) δ 7.59 – 7.49 (m, 2H), 7.25 (d, J = 2.6 Hz, 1H), 7.13 (d, J = 8.5 Hz, 2H), 7.09 (d, J = 2.6 Hz, 1H), 6.90 (s, 2H), 5.28 (s, 1H), 3.18 (h, J = 6.9 Hz, 2H), 1.25 (dd, J = 12.5, 8.3 Hz, 30H). <sup>13</sup>C NMR (101 MHz, CDCl<sub>3</sub>) δ 186.16, 156.11, 151.77, 147.12, 140.14, 133.82, 133.41, 132.52, 132.03, 131.04, 129.11, 128.53, 125.88, 124.42, 123.77, 35.28, 30.34, 29.68, 29.56, 27.16, 22.74. HRMS: calcd. for C<sub>33</sub>H<sub>41</sub>BrO<sub>2</sub> [M+H]<sup>+</sup> 548.2290; found 548.2291.

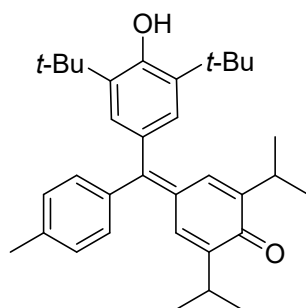

**2aa**

**4-((3,5-di-tert-butyl-4-hydroxyphenyl)(p-tolyl)methylene)-2,6-diisopropylcyclohexa-2,5-dien-1-one(2aa)** 70%(one step), 37.1%(two steps): orange solid. m.p.:222.1-223.0 °C. <sup>1</sup>H NMR (400 MHz, CDCl<sub>3</sub>) δ 7.19 – 7.12 (m, 2H), 7.11 (s, 2H), 7.06 (d, J = 7.9 Hz, 2H), 6.84 (s, 2H), 3.10 (p, J = 6.9 Hz, 2H), 2.36 (s, 3H), 1.19 (d, J = 9.3 Hz, 18H), 1.15 (d, J = 6.8 Hz, 12H). <sup>13</sup>C NMR (101 MHz, CDCl<sub>3</sub>) δ 185.09, 157.40, 150.53, 145.47, 145.31, 138.48, 137.18, 134.12, 132.06, 131.77, 131.48, 129.53, 128.02, 127.65, 127.47, 124.90, 123.45, 34.21, 34.17, 28.64, 28.52, 26.10, 21.69. HRMS: calcd. for C<sub>34</sub>H<sub>44</sub>O<sub>3</sub> [M+H]<sup>+</sup> 485.3414; found 485.3410.

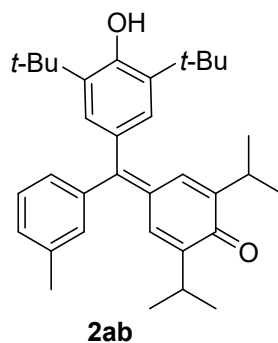

**4-((3,5-di-tert-butyl-4-hydroxyphenyl)(m-tolyl)methylene)-2,6-diisopropylcyclohexa-2,5-dien-1-one(2ab)** 60%(one step), 34.2%(two steps): orange solid. m.p.:226.6-230.1 °C. <sup>1</sup>H NMR (400 MHz, CDCl<sub>3</sub>) δ 7.21 – 7.17 (m, 3H), 7.14 (d, J = 8.2 Hz, 2H), 7.07 – 6.98 (m, 1H), 6.92 (s, 2H), 5.29 (s, 1H), 3.24 – 3.12 (m, 2H), 2.43 (s, 3H), 1.25 (dd, J = 17.8, 8.3 Hz, 30H). <sup>13</sup>C NMR (101 MHz, CDCl<sub>3</sub>) δ 186.17, 158.52, 151.66, 146.55, 146.43, 142.81, 139.55, 138.26, 135.22, 133.12, 132.80, 132.55, 128.72, 128.56, 125.97, 124.52, 35.25, 34.36, 30.38, 29.72, 29.60, 27.26, 27.16, 22.77. HRMS: calcd. for C<sub>34</sub>H<sub>44</sub>O<sub>2</sub>[M+H]<sup>+</sup> 485.3414; found 485.3410.

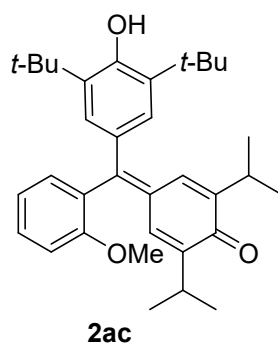

**4-((3,5-di-tert-butyl-4-hydroxyphenyl)(3-methoxyphenyl)methylene)-2,6-diisopropylcyclohexa-2,5-dien-1-one(2ac)** 70%(one step), 39.9%(two steps): orange solid. m.p.: 227.6-235.4 °C. <sup>1</sup>H NMR (400 MHz, CDCl<sub>3</sub>) δ 7.42 – 7.37 (m, 2H), 7.11 (dd, J = 7.5, 1.8 Hz, 1H), 7.03 – 6.99 (m, 1H), 6.98 – 6.93 (m, 4H), 5.05 (s, 1H), 3.60 (s, 3H), 3.15 (p, J = 6.9 Hz, 2H), 1.28 (d, J = 1.8 Hz, 9H), 1.24 – 1.15 (m, 21H). <sup>13</sup>C NMR (101 MHz, CDCl<sub>3</sub>) δ 186.42, 157.48, 154.01, 150.95, 146.88, 146.39, 133.04, 132.89, 132.61, 132.48, 131.70, 130.37, 130.27, 129.15, 127.16, 120.35, 111.59, 35.31, 35.08, 29.70, 29.50, 27.17, 22.73. HRMS: calcd. for C<sub>34</sub>H<sub>44</sub>O<sub>3</sub> [M+H]<sup>+</sup> 501.3363; found 501.3367.

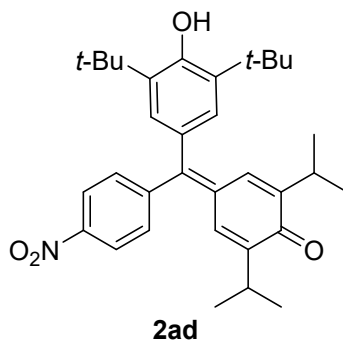

**4-((3,5-di-tert-butyl-4-hydroxyphenyl)(4-nitrophenyl)methylene)-2,6-diisopropylcyclohexa-2,5-dien-1-one(2ad)**

**ohexa-2,5-dien-1-one(2ad)** 70%(one step),40.6%(two steps): orange solid. m.p.:241.4-260.9 °C. <sup>1</sup>H NMR (400 MHz, CDCl<sub>3</sub>) δ 7.38 – 7.31 (m, 1H), 7.29 (d, J = 2.6 Hz, 1H), 7.18 (s, 1H), 7.15 – 7.03 (m, 3H), 6.87 (s, 2H), 5.07 (s, 1H), 3.07 (dq, J = 13.6, 6.8 Hz, 2H), 1.23 – 1.08 (m, 30H). <sup>13</sup>C NMR (101 MHz, CDCl<sub>3</sub>) δ 185.72, 157.81, 150.38, 148.92, 146.32, 146.04, 134.23, 132.27, 132.08, 131.05, 130.76, 130.47, 129.90, 129.81, 128.80, 127.64, 126.36, 124.83, 123.33, 122.65, 114.89, 114.67, 34.30, 34.10, 29.28, 29.20, 28.64, 28.39, 26.11, 21.62. HRMS: calcd. for C<sub>33</sub>H<sub>41</sub>NO<sub>4</sub>[M+H]<sup>+</sup> 515.3036; found 515.3039.

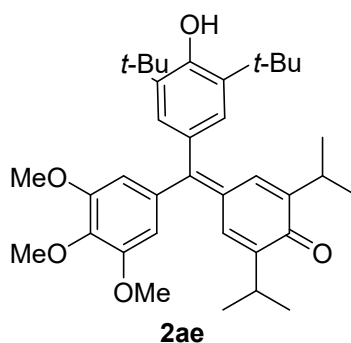

**4-((3,5-di-tert-butyl-4-hydroxyphenyl)(3,4,5-trimethoxyphenyl)methylene)-2,6-diisopropylcyclohexa-2,5-dien-1-one(2ae)** 42%(one step), 18.1%(two steps): orange solid. m.p.:247.6-267.0 °C. <sup>1</sup>H NMR (400 MHz, CDCl<sub>3</sub>) δ 7.26 – 7.23 (m, 2H), 6.96 (s, 2H), 6.49 (s, 2H), 3.97 (s, 3H), 3.80 (s, 6H), 3.20 (p, J = 6.9 Hz, 2H), 1.28 (d, J = 4.8 Hz, 18H), 1.25 (d, J = 6.8 Hz, 12H). <sup>13</sup>C NMR (101 MHz, CDCl<sub>3</sub>) δ 185.72,136.51, 135.31, 133.20, 132.84, 132.70, 132.53, 128.90, 125.83, 124.37, 110.71, 110.33, 106.72, 106.55, 35.28, 34.37, 30.36, 30.13, 29.70, 27.18, 27.13, 22.79, 22.36. HRMS: calcd. for C<sub>36</sub>H<sub>48</sub>O<sub>5</sub> [M+H]<sup>+</sup> 561.3574; found 561.3574.

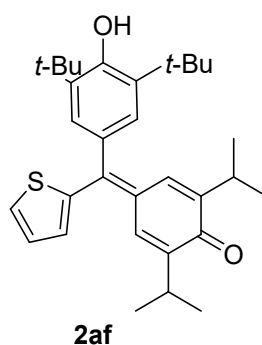

**4-((3,5-di-tert-butyl-4-hydroxyphenyl)(thiophen-2-yl)methylene)-2,6-diisopropylcyclohexa-2,5-dien-1-one(2af)** 87%(one step), 41.8%(two steps): orange solid. m.p.:212.1-220.0 °C. <sup>1</sup>H NMR (400 MHz, CDCl<sub>3</sub>) δ 7.89 – 7.69 (m, 3H), 7.51 – 7.40 (m, 2H), 7.20 – 7.11 (m, 1H), 6.89 (d, J = 8.0 Hz, 2H), 5.20 (s, 1H), 3.07 (dp, J = 25.0, 6.9 Hz, 2H), 1.34 – 1.19 (m, 12H), 1.17 – 1.07 (m, 18H). <sup>13</sup>C NMR (101 MHz, CDCl<sub>3</sub>) δ 186.19, 157.83, 151.70, 146.84, 138.56, 135.36, 133.24, 132.83, 132.66, 129.63, 129.30, 128.76, 128.57, 127.93, 127.77, 127.31, 127.16, 126.63, 126.10, 125.67, 125.24, 124.65, 35.35, 35.28, 34.43, 30.38, 30.33, 29.75, 29.60, 27.29, 27.20, 22.77, 22.39, 22.18. HRMS: calcd. for C<sub>31</sub>H<sub>40</sub>O<sub>2</sub>S [M+H]<sup>+</sup> 477.2821; found 477.2820.

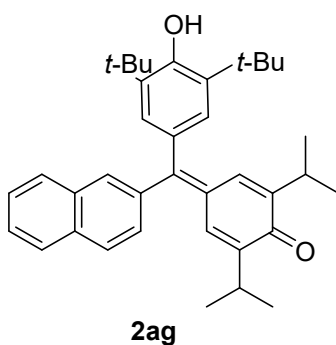

**4-((3,5-di-tert-butyl-4-hydroxyphenyl)(naphthalen-2-yl)methylene)-2,6-diisopropylcyclohexa-2,5-dien-1-one(2ag)** 68%(one step), 40.1%(two steps): orange solid. m.p.: 90.4-301.7 °C. <sup>1</sup>H NMR (400 MHz, CDCl<sub>3</sub>) δ 7.92 – 7.78 (m, 4H), 7.61 – 7.51 (m, 2 H), 7.31 (dd, *J* = 8.5, 1.7 Hz, 1H), 7.28 – 7.23 (m, 2H), 6.98 (s, 2H), 5.29 (s, 1H), 3.18 (p, *J* = 6.9 Hz, 2H), 1.32 – 1.18 (m, 30H). <sup>13</sup>C NMR (101 MHz, CDCl<sub>3</sub>) δ 157.89, 138.55, 133.53, 132.70, 132.64, 129.60, 128.56, 127.75, 127.49, 127.29, 127.13, 126.61, 53.44, 35.22, 29.71, 27.16, 27.10, 22.70. HRMS: calcd. for C<sub>37</sub>H<sub>44</sub>O<sub>2</sub> [M+H]<sup>+</sup> 521.3414; found 521.3418.

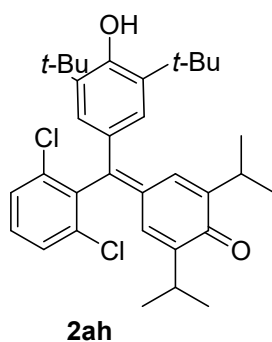

**4-((3,5-di-tert-butyl-4-hydroxyphenyl)(2,6-dichlorophenyl)methylene)-2,6-diisopropylcyclohexa-2,5-dien-1-one(2ah)** 53%(one step), 21.7%(two steps): orange solid. m.p.: 253.3-260.1 °C. <sup>1</sup>H NMR (400 MHz, CDCl<sub>3</sub>) δ 7.42 (d, *J* = 2.1 Hz, 1H), 7.30 (s, 1H), 7.24 (dd, *J* = 8.2, 2.1 Hz, 1H), 7.10 (d, *J* = 8.3 Hz, 1H), 6.84 (s, 2H), 6.69 – 6.60 (m, 1 H), 5.13 (s, 1H), 3.08 (p, *J* = 6.8 Hz, 2H), 1.29 – 1.06 (m, 30H). <sup>13</sup>C NMR (101 MHz, CDCl<sub>3</sub>) δ 185.35, 150.41, 146.91, 146.47, 137.43, 133.91, 132.52, 132.34, 132.11, 130.11, 129.95, 128.80, 128.76, 126.33, 125.74, 123.51, 34.34, 34.12, 30.41, 28.67, 28.46, 26.14, 21.79, 21.62. HRMS: calcd. for C<sub>33</sub>H<sub>40</sub>O<sub>2</sub>Cl [M+H]<sup>+</sup> 539.2478; found 539.2475.

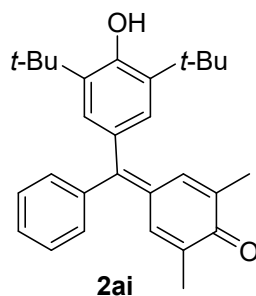

**4-((3,5-di-tert-butyl-4-hydroxyphenyl)(phenyl)methylene)-2,6-dimethylcyclohexa-2,5-dien-1-one(2ai)** 70%(one step), 45.5%(two steps): orange solid. m.p.:210.4-212.9 °C. <sup>1</sup>H NMR (400 MHz, CDCl<sub>3</sub>) δ 7.44 – 7.38 (m, 3H), 7.27 – 7.22 (m, 3H), 7.10 (d, J = 2.7 Hz, 1H), 6.88 (s, 2H), 4.98 (d, J = 4.4 Hz, 1H), 2.25 (s, 6H), 1.25 (d, J = 17.7 Hz, 18H). <sup>13</sup>C NMR (101 MHz, CDCl<sub>3</sub>) δ 186.09, 156.76, 153.63, 146.79, 141.08, 133.09, 132.74, 132.56, 132.36, 132.14, 129.16, 129.00, 127.87, 122.11, 35.23, 29.59, 29.51, 15.82. HRMS: calcd. for C<sub>29</sub>H<sub>34</sub>O<sub>2</sub> [M+H]<sup>+</sup> 415.2631; found 415.2631.

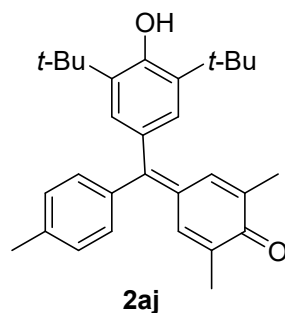

**4-((3,5-di-tert-butyl-4-hydroxyphenyl)(p-tolyl)methylene)-2,6-dimethylcyclohexa-2,5-dien-1-one(2aj)** 73%(one step), 38.7%(two steps): orange solid. m.p.:215.0-220.6 °C. <sup>1</sup>H NMR (400 MHz, CDCl<sub>3</sub>) δ 7.21 – 6.62 (m, 8H), 5.01 (d, J = 25.1 Hz, 1H), 2.38 – 2.06 (m, 9H), 1.35 – 1.09 (m, 18H). <sup>13</sup>C NMR (101 MHz, CDCl<sub>3</sub>) δ 186.10, 157.54, 142.43, 139.53, 138.17, 136.65, 135.22, 134.70, 133.21, 132.89, 132.81, 132.60, 132.36, 129.47, 129.14, 128.78, 128.66, 125.95, 122.68, 122.54, 35.25, 34.37, 30.38, 29.58, 21.50, 21.06, 16.06, 15.85. HRMS: calcd. for C<sub>30</sub>H<sub>36</sub>O<sub>2</sub> [M+H]<sup>+</sup> 429.2788; found 429.2790.

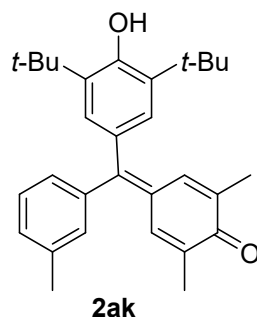

**4-((3,5-di-tert-butyl-4-hydroxyphenyl)(m-tolyl)methylene)-2,6-dimethylcyclohexa-2,5-dien-1-one(2ak)** 81%(one step), 46.2%(two steps): orange solid. m.p.:239.3-244.0 °C. <sup>1</sup>H NMR (400 MHz, CDCl<sub>3</sub>) δ 7.19 (dd, J = 9.6, 7.2 Hz, 3H), 7.05 (d, J = 2.3 Hz, 1H), 6.92 – 6.87 (m, 1H), 6.84 (s, 1H), 6.81 (s, 2H), 6.65 (s, 1H), 2.18 (s, 6H), 2.10 (s, 3H), 1.17 (d, J = 14.1 Hz, 18H). <sup>13</sup>C NMR (101 MHz, CDCl<sub>3</sub>) δ 186.34, 157.36, 153.13, 153.08, 146.69, 146.48, 132.51, 132.49, 132.28, 131.88, 131.75, 130.32, 129.99, 129.40, 122.46, 120.29, 111.49, 55.72, 53.46, 35.29, 35.07, 30.39, 30.31, 29.59, 29.49, 15.85. HRMS: calcd. for C<sub>30</sub>H<sub>36</sub>O<sub>2</sub> [M+H]<sup>+</sup> 429.2788; found 429.2790.

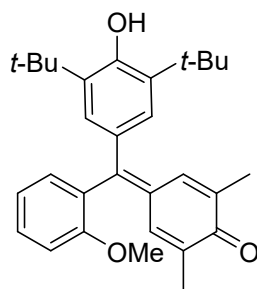

**2al**

**4-((3,5-di-tert-butyl-4-hydroxyphenyl)(2-methoxyphenyl)methylene)-2,6-dimethylcyclohexa-2,5-dien-1-one(2al)** 66%(one step), 37.6%(two steps): orange solid. m.p.:241.8-248.3 °C. <sup>1</sup>H NMR (400 MHz, CDCl<sub>3</sub>) δ 7.43 – 7.37 (m, 2H), 7.09 (dd, J = 7.5, 1.9 Hz, 1H), 7.03 – 6.94 (m, 2H), 6.92 – 6.86 (m, 3H), 4.90 (s, 1H), 3.65 (s, 3H), 2.24 (s, 6H), 1.27 (s, 9H), 1.18 (s, 9H). <sup>13</sup>C NMR (101 MHz, CDCl<sub>3</sub>) δ 186.34, 157.36, 153.08, 146.69, 146.48, 132.51, 132.29, 131.88, 131.75, 130.32, 129.99, 129.40, 122.46, 120.29, 111.49, 35.29, 35.07, 29.59, 29.49, 15.85. HRMS: calcd. for C<sub>30</sub>H<sub>36</sub>O<sub>3</sub> [M+H]<sup>+</sup> 445.2737; found 445.2732.

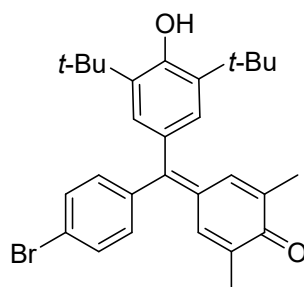

**2am**

**4-((4-bromophenyl)(3,5-di-tert-butyl-4-hydroxyphenyl)methylene)-2,6-dimethylcyclohexa-2,5-dien-1-one(2am)** 67%(one step), 41.5%(two steps): orange solid. m.p.:275.2-279.4 °C. <sup>1</sup>H NMR (400 MHz, CDCl<sub>3</sub>) δ 7.57 – 7.52 (m, 2H), 7.25 (d, J = 2.7 Hz, 1H), 7.15 – 7.09 (m, 2H), 7.06 (d, J = 2.6 Hz, 1H), 6.85 (s, 2H), 5.03 (s, 1H), 2.25 (s, 6H), 1.26 (s, 9H), 1.24 (s, 9H). <sup>13</sup>C NMR (101 MHz, CDCl<sub>3</sub>) δ 186.06, 155.15, 153.79, 147.21, 147.04, 139.99, 133.66, 133.07, 132.41, 132.29, 131.76, 131.20, 129.22, 123.71, 122.82, 35.29, 29.54, 21.10, 15.83, 14.23. HRMS: calcd. for C<sub>29</sub>H<sub>33</sub>BrO<sub>2</sub> [M+H]<sup>+</sup> 495.1717; found 495.1713.

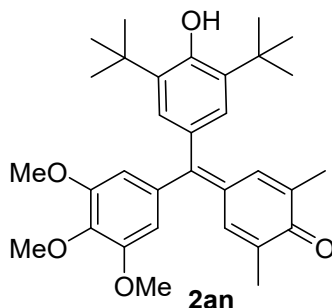

**2an**

**4-((3,5-di-tert-butyl-4-hydroxyphenyl)(3,4,5-trimethoxyphenyl)methylene)-2,6-dimethylcyclohexa-2,5-dien-1-one(2an)** 90%(one step), 38.7%(two steps): orange solid. m.p.:249.8-261.1 °C. <sup>1</sup>H NMR (400 MHz, CDCl<sub>3</sub>) δ 7.25 (d, J = 2.7 Hz, 1H), 7.19 (d, J = 2.5 Hz, 1H), 6.91 (s, 2H), 6.47 (s, 2H), 5.20 (d, J = 7.6 Hz, 1H), 3.96 (s, 3H), 3.80 (s,

6H), 2.28 (s, 6H), 1.26 (d, J = 4.6 Hz, 18H).  $^{13}\text{C}$  NMR (101 MHz,  $\text{CDCl}_3$ )  $\delta$  191.20, 186.10, 157.12, 153.87, 153.66, 152.49, 146.59, 143.62, 139.00, 136.41, 133.25, 132.77, 132.40, 132.33, 131.70, 128.82, 109.89, 106.74, 35.25, 29.67, 15.87. HRMS: calcd. for  $\text{C}_{32}\text{H}_{40}\text{O}_5[\text{M}+\text{H}]^+$  505.2948; found 505.2944.

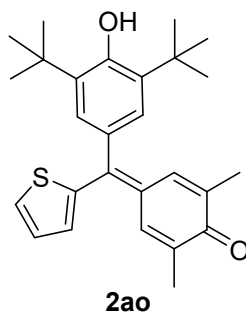

**4-((3,5-di-tert-butyl-4-hydroxyphenyl)(thiophen-2-yl)methylene)-2,6-dimethylcyclohexa-2,5-dien-1-one(2ao)** 75%(one step), 36%(two steps): orange solid. m.p.:258.6-263.9  $^{\circ}\text{C}$ .  $^1\text{H}$  NMR (400 MHz,  $\text{CDCl}_3$ )  $\delta$  7.60 (dd, J = 4.9, 1.3 Hz, 2H), 7.32 – 6.89 (m, 5 H), 5.16 (d, J = 52.2 Hz, 1H), 2.24 (d, J = 29.5 Hz, 6H), 1.37 – 1.18 (m, 18H).  $^{13}\text{C}$  NMR (101 MHz,  $\text{CDCl}_3$ )  $\delta$  148.72, 144.05, 133.28, 133.02, 132.50, 130.98, 129.17, 127.60, 125.36, 60.51, 35.30, 30.35, 29.62, 16.10, 15.92, 14.23. HRMS: calcd. for  $\text{C}_{37}\text{H}_{42}\text{O}_2\text{S}[\text{M}+\text{H}]^+$  421.2195; found 421.2194.

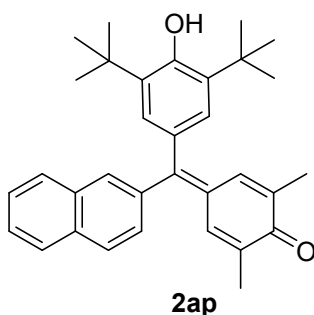

**4-((3,5-di-tert-butyl-4-hydroxyphenyl)(naphthalen-2-yl)methylene)-2,6-dimethylcyclohexa-2,5-dien-1-one(2ap)** 84%(one step), 49.6%(two steps): orange solid. m.p.:254.0-255.0  $^{\circ}\text{C}$ .  $^1\text{H}$  NMR (400 MHz,  $\text{CDCl}_3$ )  $\delta$  7.94 – 7.69 (m, 4H), 7.61 – 7.46 (m, 2H), 7.35 – 7.15 (m, 3H), 6.94 (d, J = 24.3 Hz, 2H), 5.08 (d, J = 7.4 Hz, 1H), 2.21 (d, J = 28.4 Hz, 6H), 1.34 – 1.16 (m, 18H).  $^{13}\text{C}$  NMR (101 MHz,  $\text{CDCl}_3$ )  $\delta$  186.09, 156.97, 147.01, 146.83, 135.39, 133.25, 132.64, 132.50, 129.49, 129.34, 128.61, 127.76, 127.49, 127.17, 126.67, 126.07, 125.75, 125.32, 122.76, 60.49, 56.28, 34.39, 29.63, 16.06, 15.85, 14.24. HRMS: calcd. for  $\text{C}_{33}\text{H}_{36}\text{O}_2[\text{M}+\text{H}]^+$  465.1423; found 465.1423.



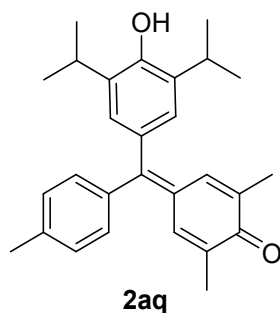

**4-((4-hydroxy-3,5-diisopropylphenyl)(p-tolyl)methylene)-2,6-dimethylcyclohexa-2,5-dien-1-one (2aq)** 70%(one step), 35%(two steps): orange solid. m.p.:200.1-219.0 °C. <sup>1</sup>H NMR (400 MHz, CDCl<sub>3</sub>) δ 7.23 (s, 1H), 7.21 (s, 1H), 7.14 (d, *J* = 8.1 Hz, 2H), 7.06 (s, 2H), 6.97 (s, 2H), 3.20 (p, *J* = 6.9 Hz, 2H), 2.44 (s, 3H), 2.19 (s, 6H), 1.12 (s, 6H), 1.11 (s, 6H). <sup>13</sup>C NMR (101 MHz, CDCl<sub>3</sub>) δ 158.61, 139.88, 138.01, 136.53, 134.46, 132.63, 128.87, 128.80, 128.68, 127.41, 127.23, 122.85, 122.68, 27.38, 26.79, 22.72, 22.30, 21.49, 16.12.

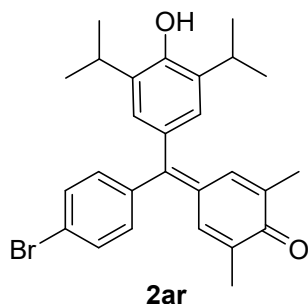

**4-((4-bromophenyl)(4-hydroxy-3,5-diisopropylphenyl)methylene)-2,6-dimethylcyclohexa-2,5-dien-1-one(2ar)** 60%(one step), 28.2%(two steps): orange solid. m.p.:252.6-260.0 °C. <sup>1</sup>H NMR (400 MHz, CDCl<sub>3</sub>) δ 7.55 – 7.43 (m, 1H), 7.32 – 7.00 (m, 3H), 6.94 – 6.75 (m, 2H), 6.68 (s, 1H), 6.60 (s, 1H), 5.21 (d, *J* = 8.0 Hz, 1H), 4.05 (q, *J* = 7.2 Hz, 1H), 3.03 (p, *J* = 6.9 Hz, 1H), 2.14 – 1.92 (m, 6H), 1.24 – 1.04 (m, 12H). <sup>13</sup>C NMR (101 MHz, CDCl<sub>3</sub>) δ 171.31, 154.20, 150.59, 148.45, 144.42, 135.37, 133.42, 131.07, 129.51, 124.43, 122.78, 26.80, 22.72, 22.10, 21.10, 15.88, 14.23. HRMS: calcd. For C<sub>27</sub>H<sub>29</sub>BrO<sub>2</sub>[M+H]<sup>+</sup>465.1423; found465.1423.

#### 4. <sup>1</sup>H and <sup>13</sup>C NMR spectra of the products

##### 2,6-di-tert-butyl-4-((3,5-di-tert-butyl-4-

##### hydroxyphenyl)(phenyl)methylene)cyclohexa-2,5-dien-1-one (2a)

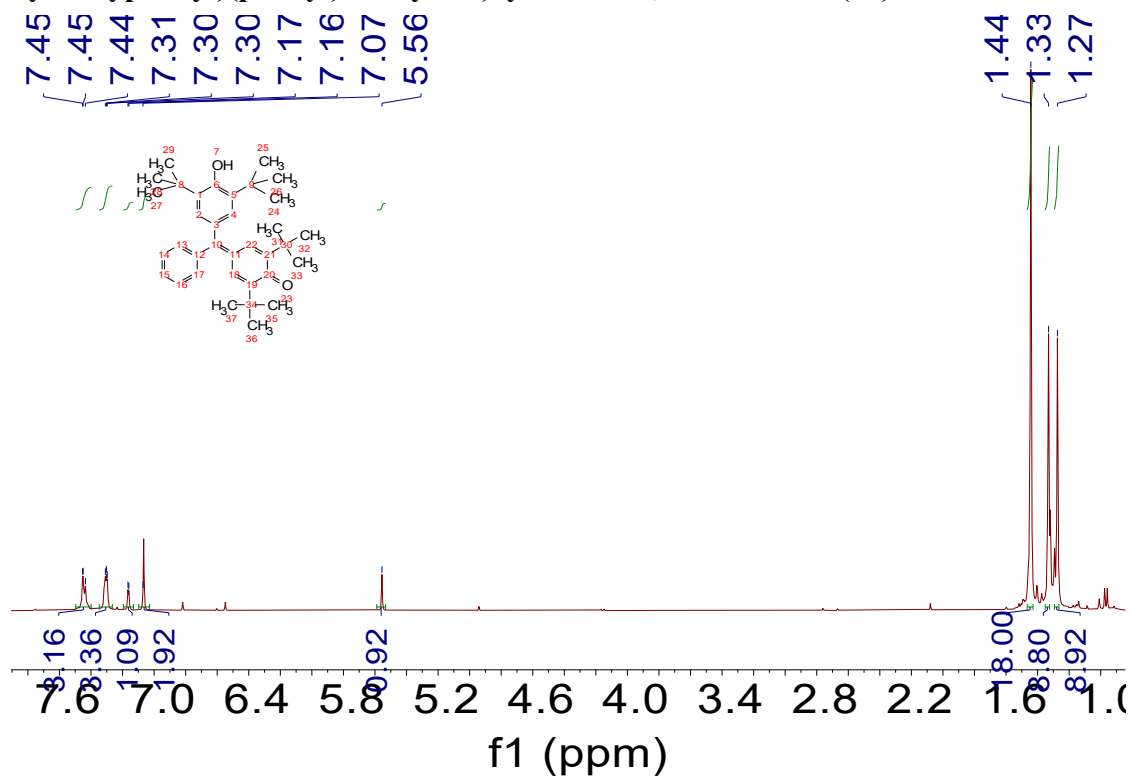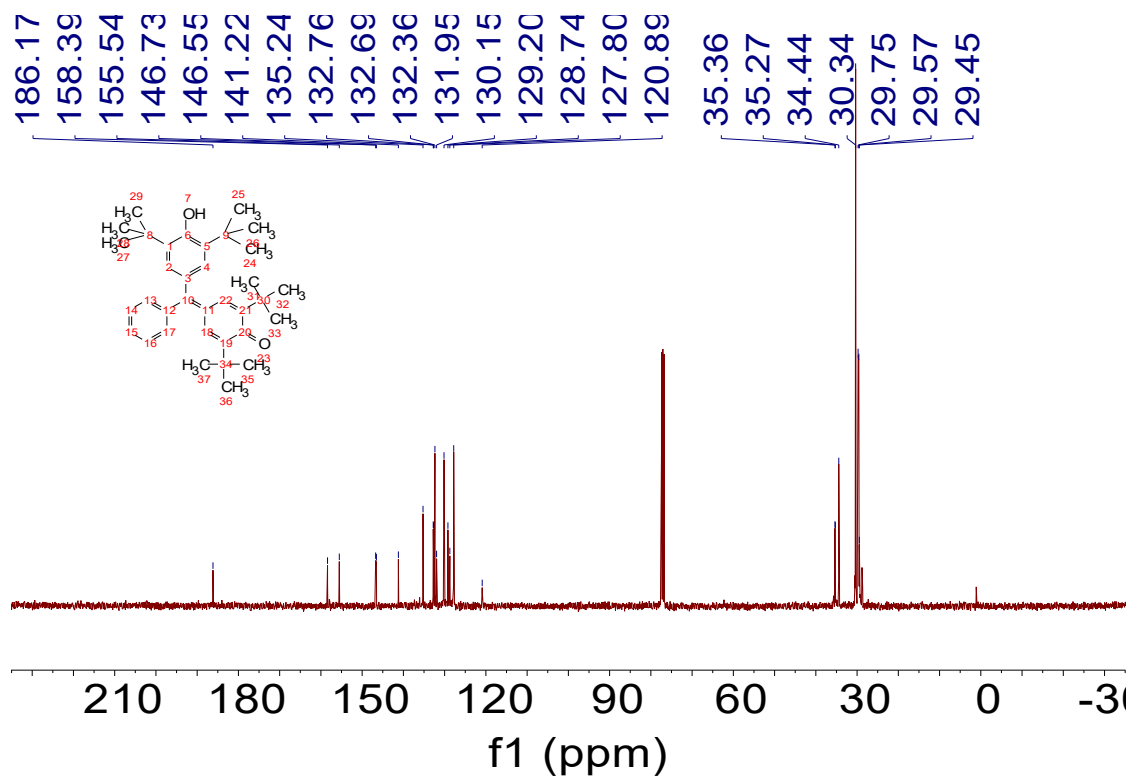

##### 2,6-di-tert-butyl-4-((3,5-di-tert-butyl-4-hydroxyphenyl)(p-

##### tolyl)methylene)cyclohexa-2,5-dien-1-one(2b)

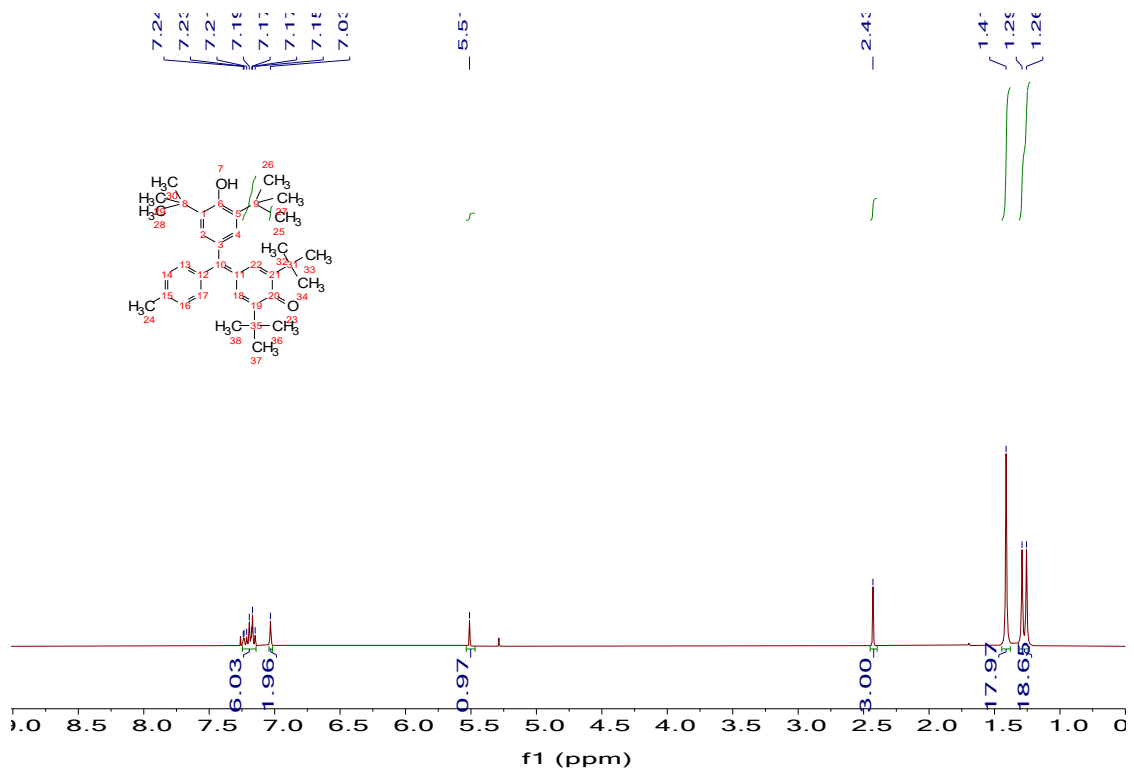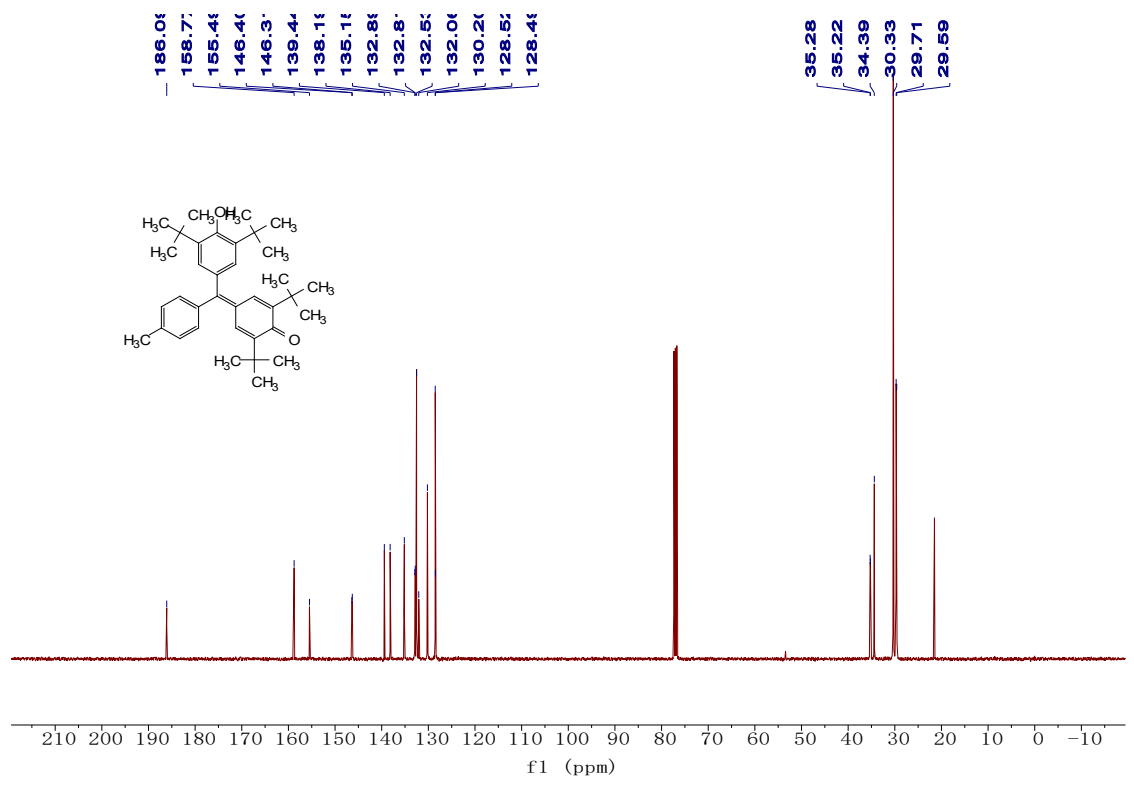

**2,6-di-tert-butyl-4-((3,5-di-tert-butyl-4-hydroxyphenyl)(m-tolyl)methylene)cyclohexa-2,5-dien-1-one(2c)**

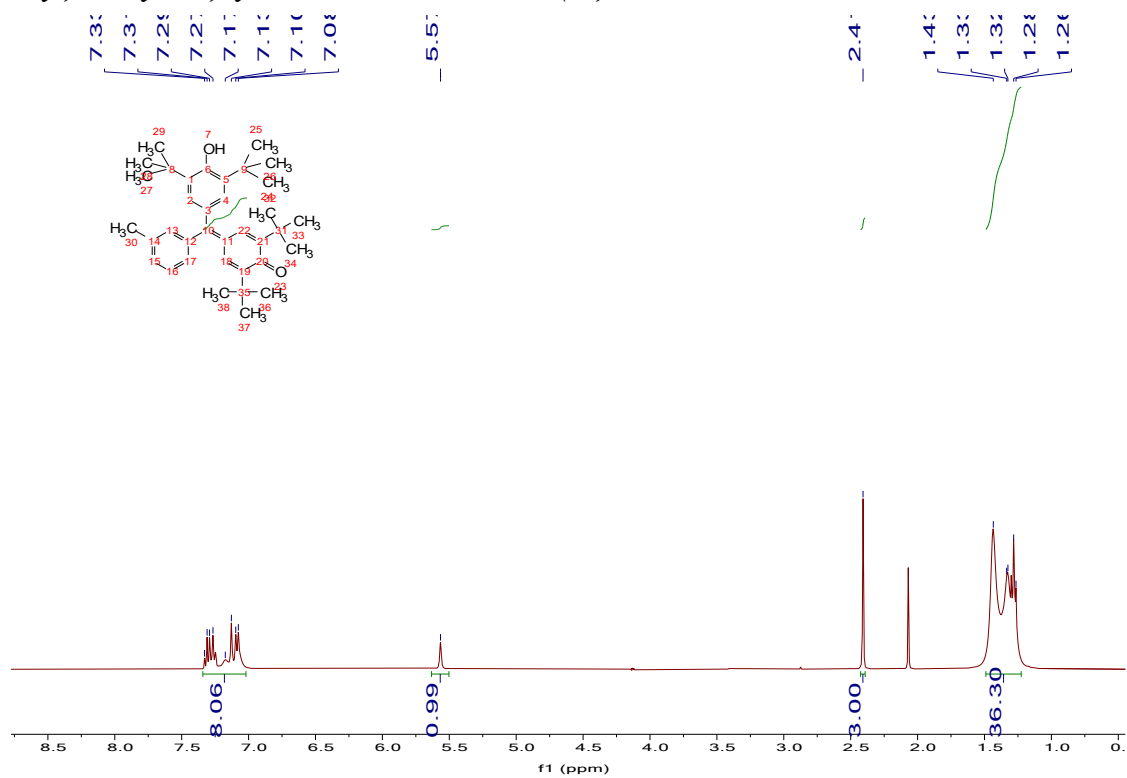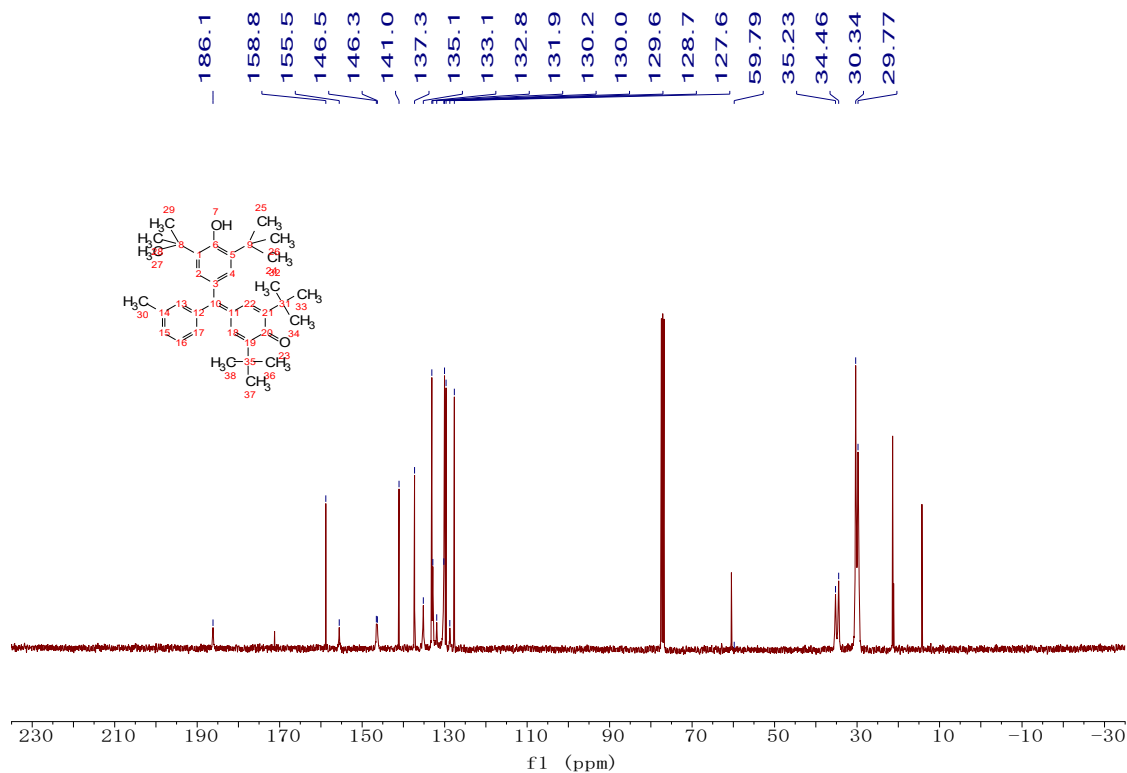

**2,6-di-tert-butyl-4-((3,5-di-tert-butyl-4-hydroxyphenyl)(4-methoxyphenyl)methylene)cyclohexa-2,5-dien-1-one(2d)**

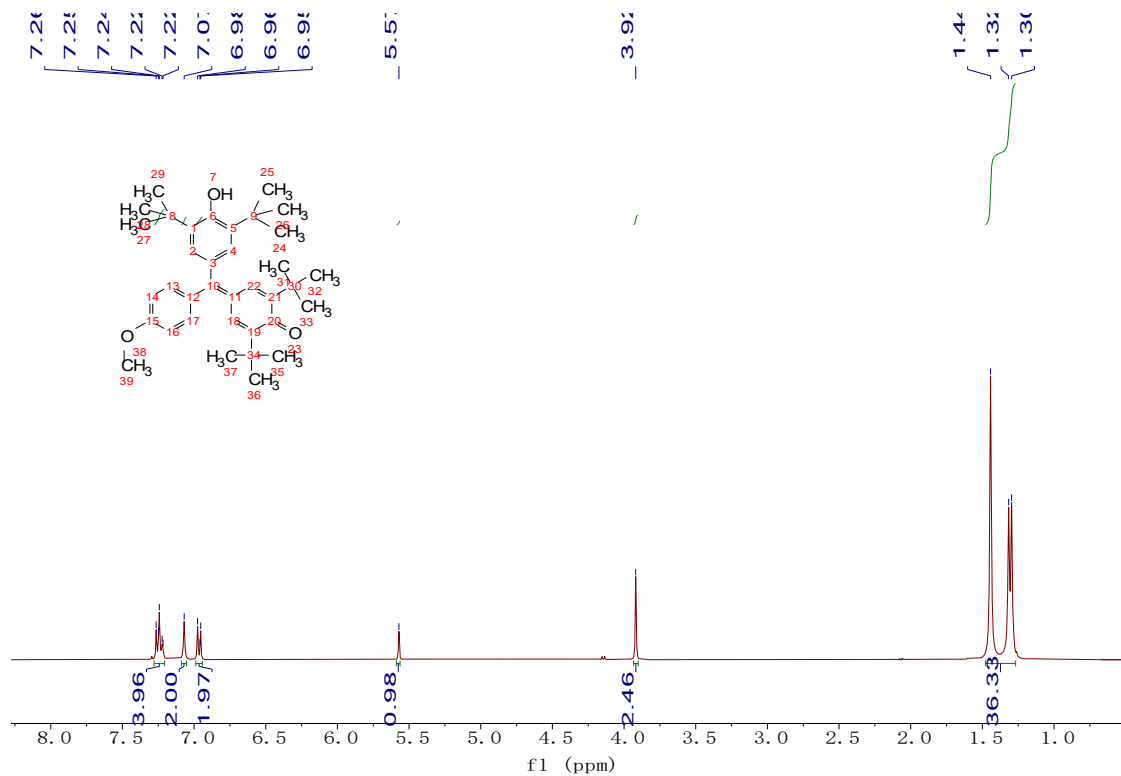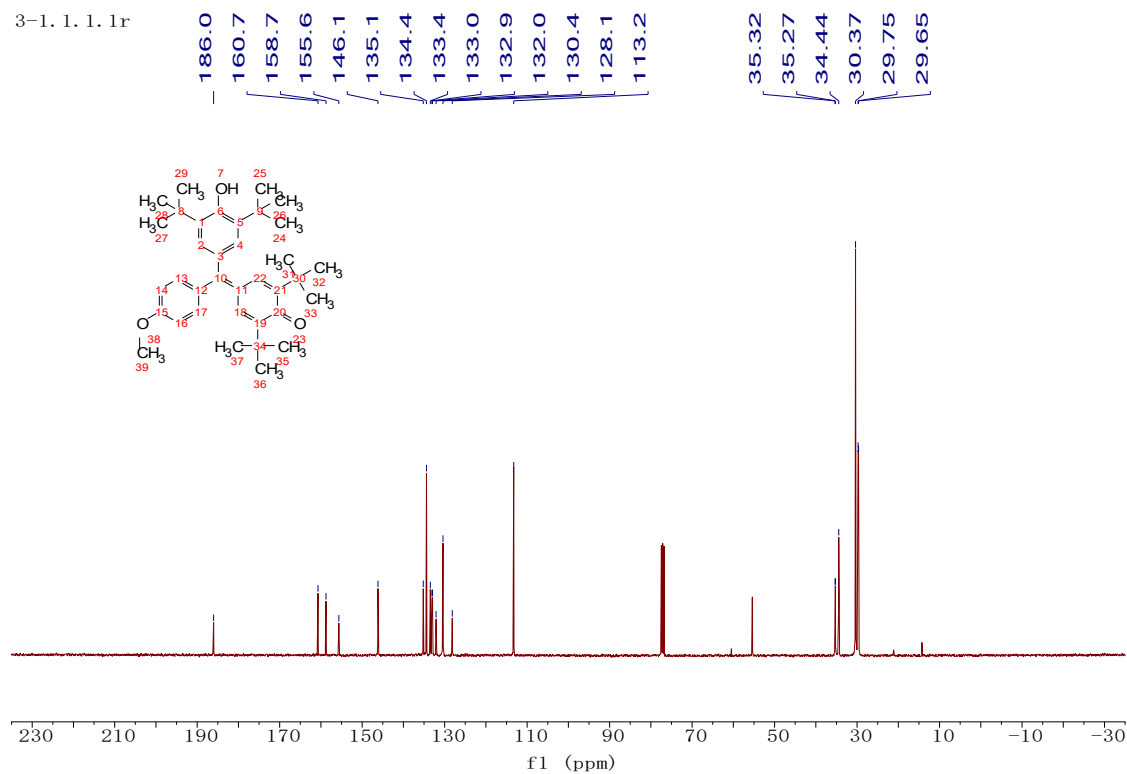

**2,6-di-tert-butyl-4-((3,5-di-tert-butyl-4-hydroxyphenyl)(2-**

**methoxyphenyl)methylene)cyclohexa-2,5-dien-1-one(2e)**

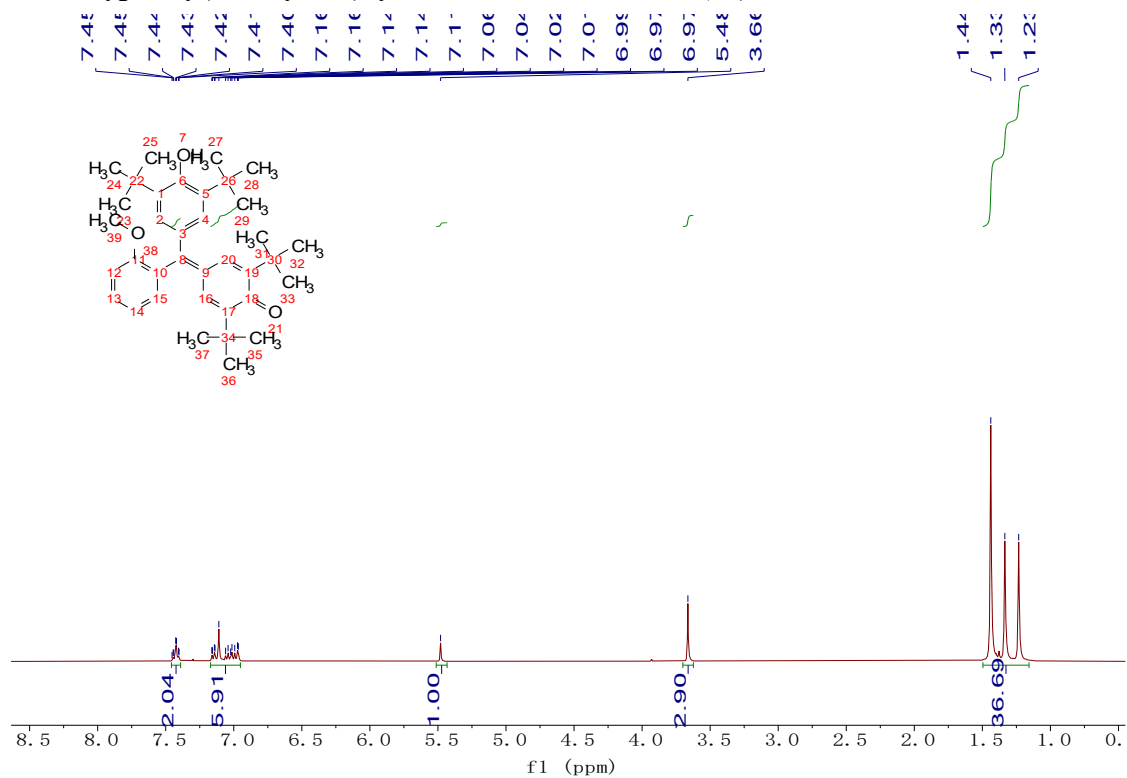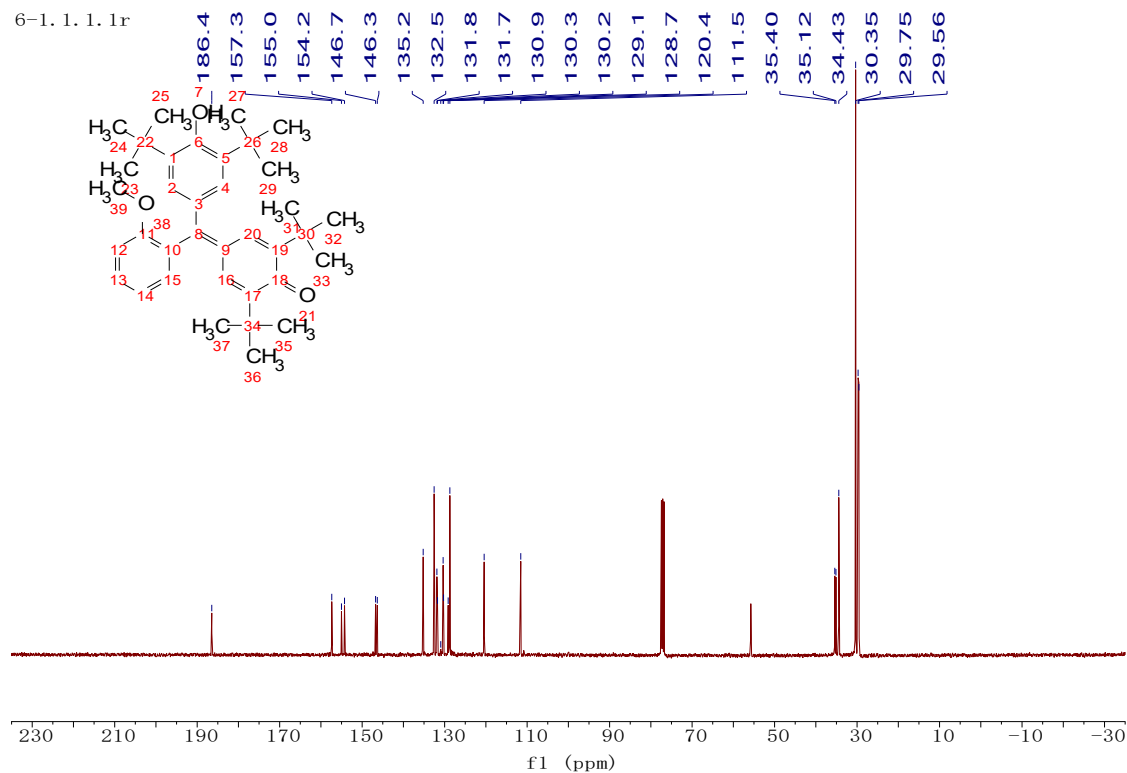

**2,6-di-tert-butyl-4-((3,5-di-tert-butyl-4-hydroxyphenyl)(4-isopropylphenyl)methylene)cyclohexa-2,5-dien-1-one(2f)**

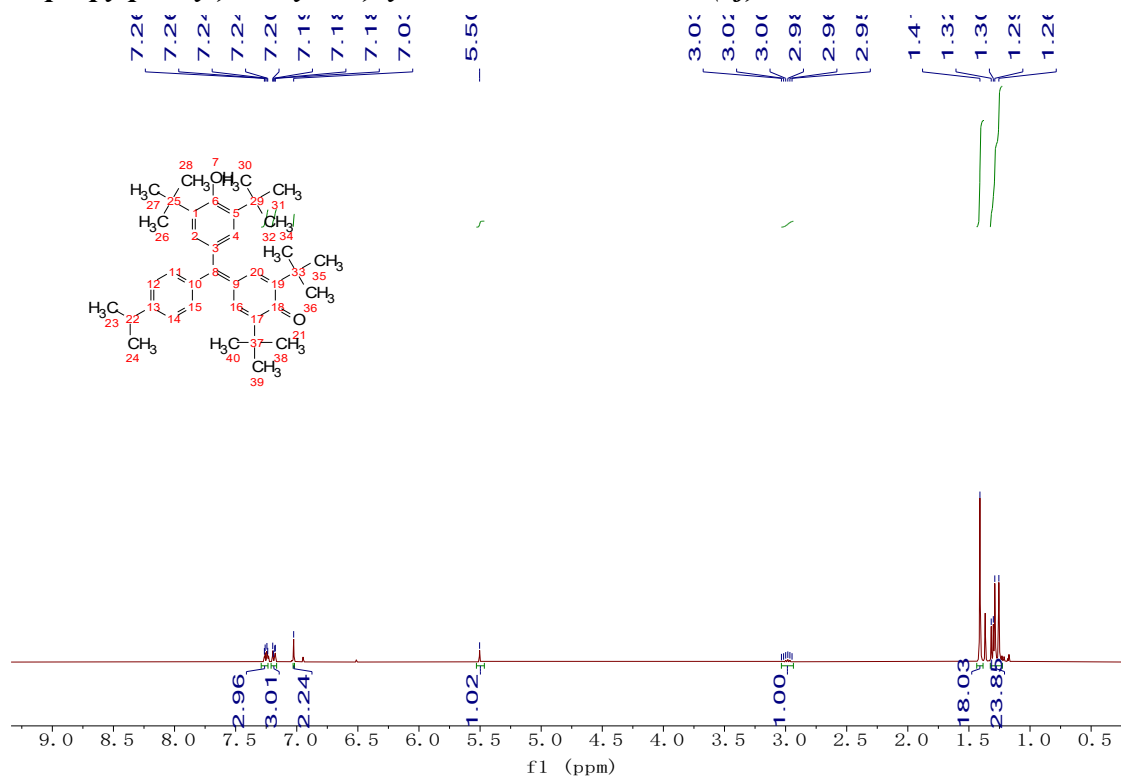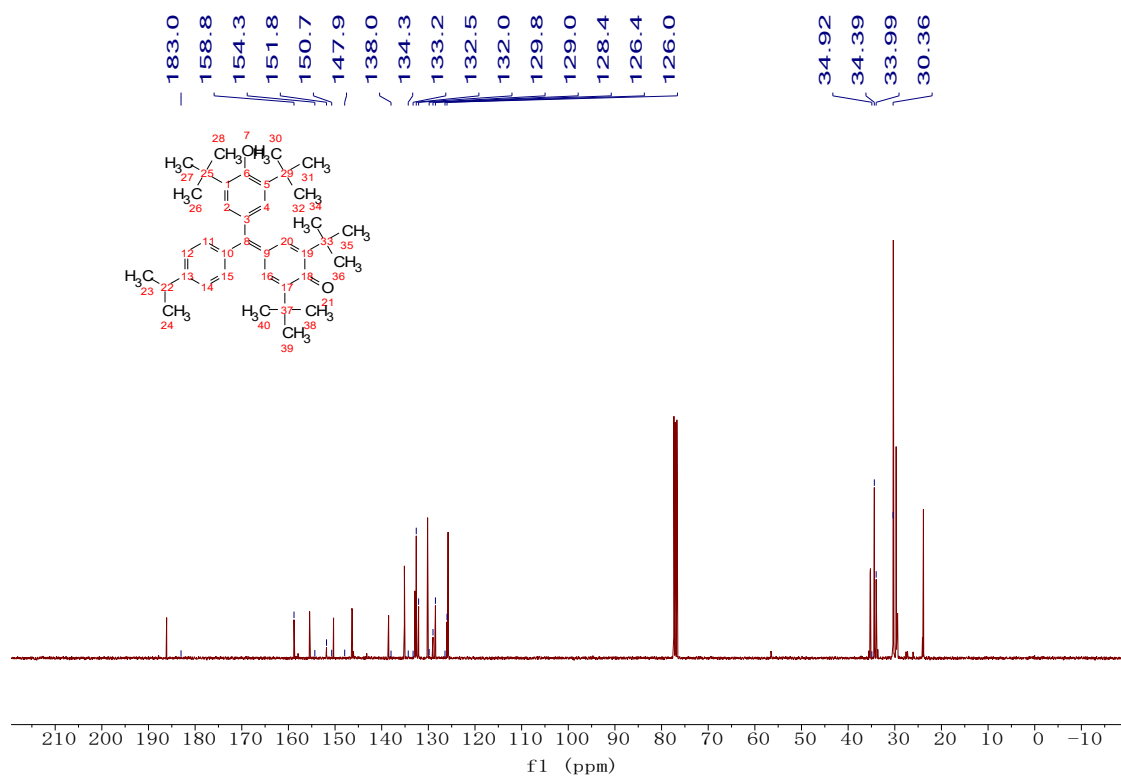

**2,6-di-tert-butyl-4-((3,5-di-tert-butyl-4-hydroxyphenyl)(4-(dimethylamino)phenyl)methylene)cyclohexa-2,5-dien-1-one(2g)**

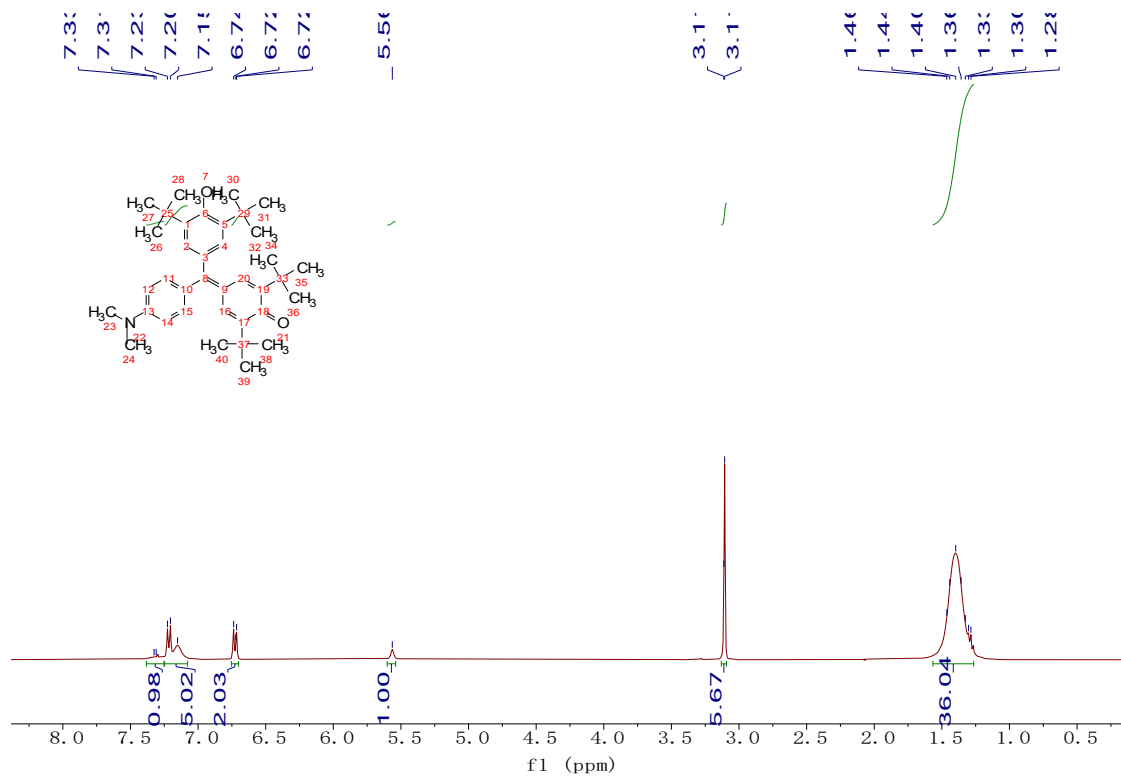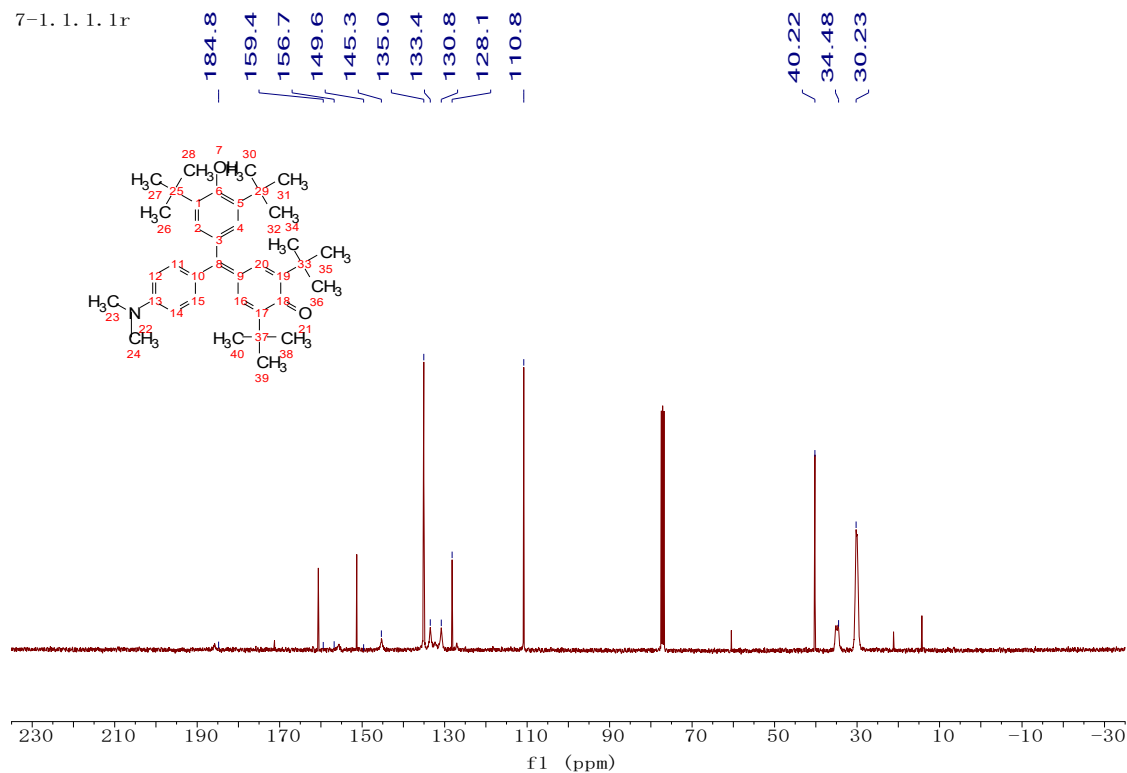



**2,6-di-tert-butyl-4-((3,5-di-tert-butyl-4-hydroxyphenyl)(3,4-dimethoxyphenyl)methylene)cyclohexa-2,5-dien-1-one(2h)**

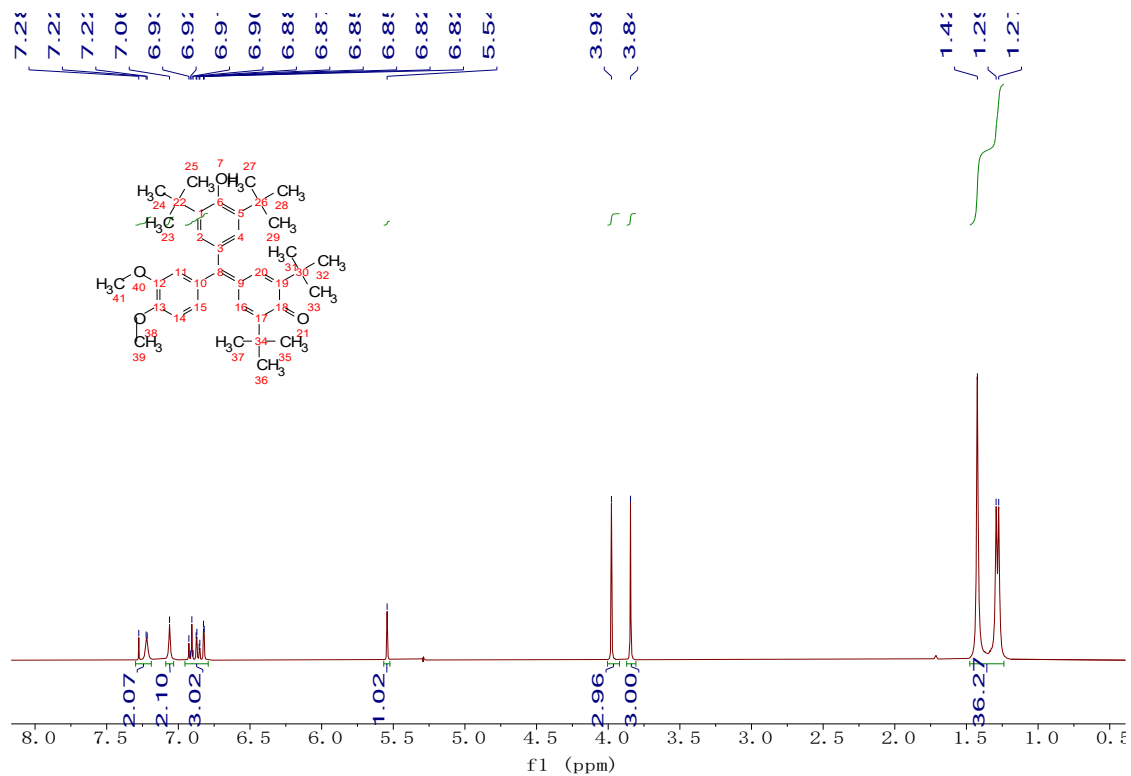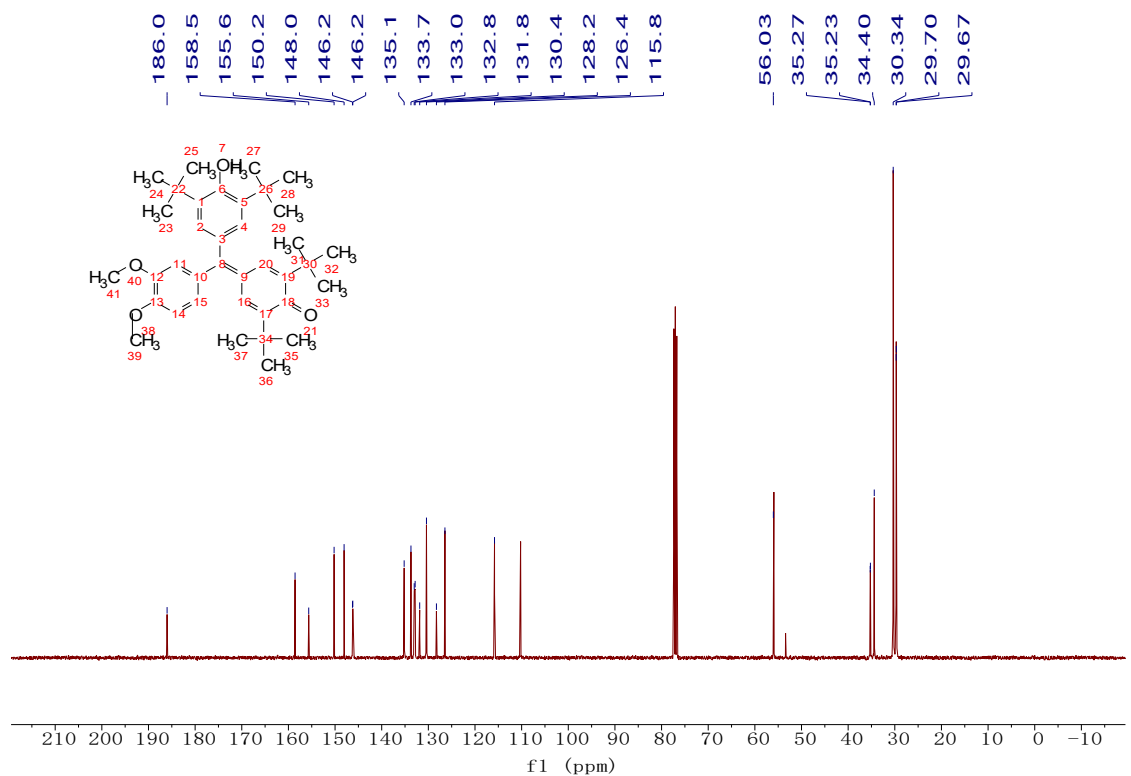

**2,6-di-tert-butyl-4-((3,5-di-tert-butyl-4-hydroxyphenyl)(3,4,5-trimethoxyphenyl)methylene)cyclohexa-2,5-dien-1-one(2i)**

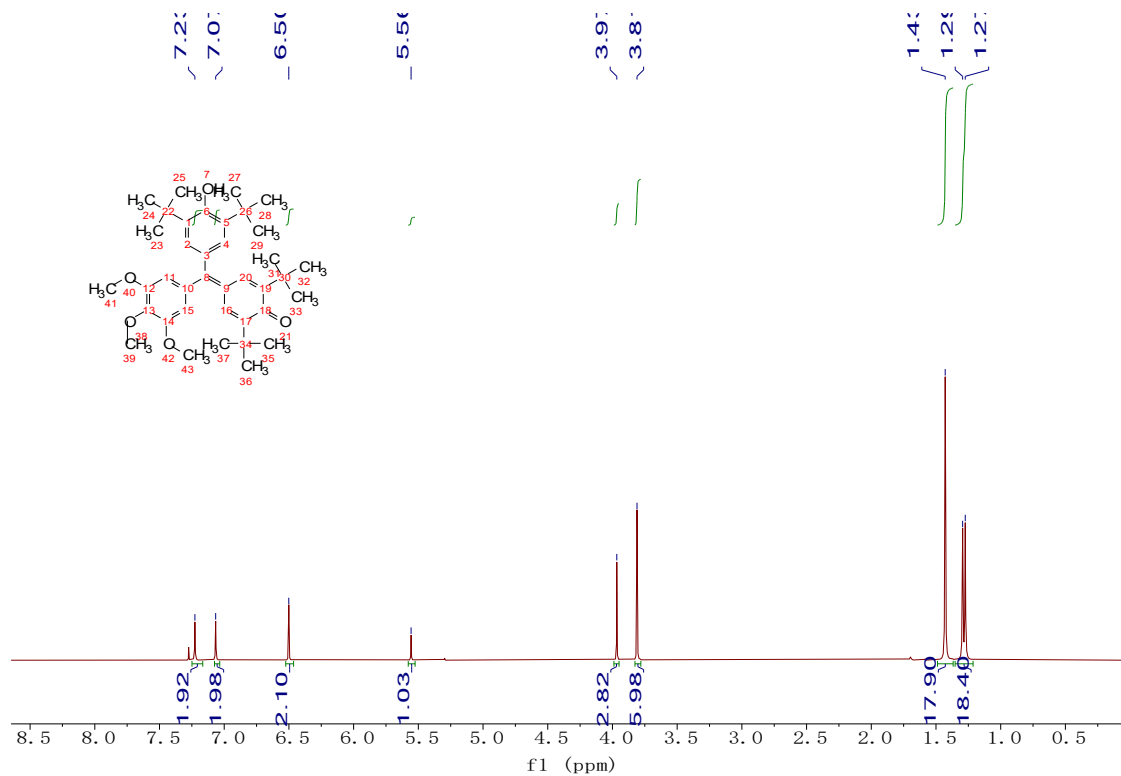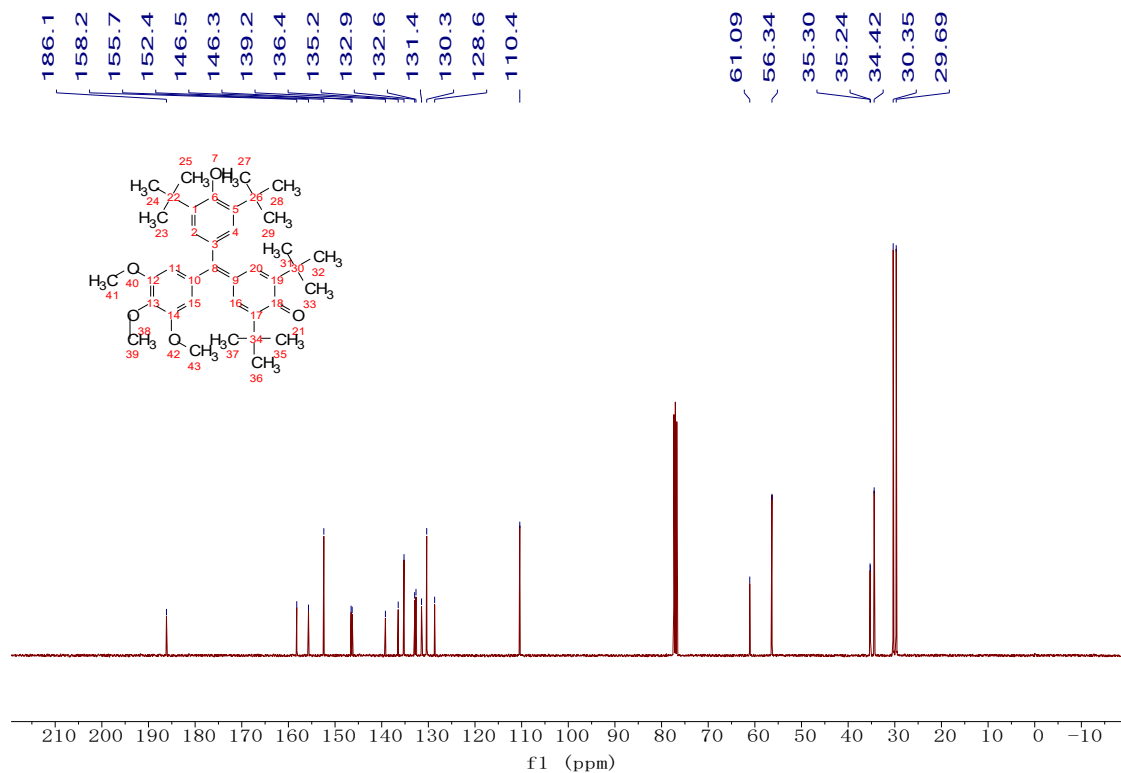

**4-((4-bromophenyl)(3,5-di-tert-butyl-4-hydroxyphenyl)methylene)-2,6-di-tert-butylcyclohexa-2,5-dien-1-one(2j)**

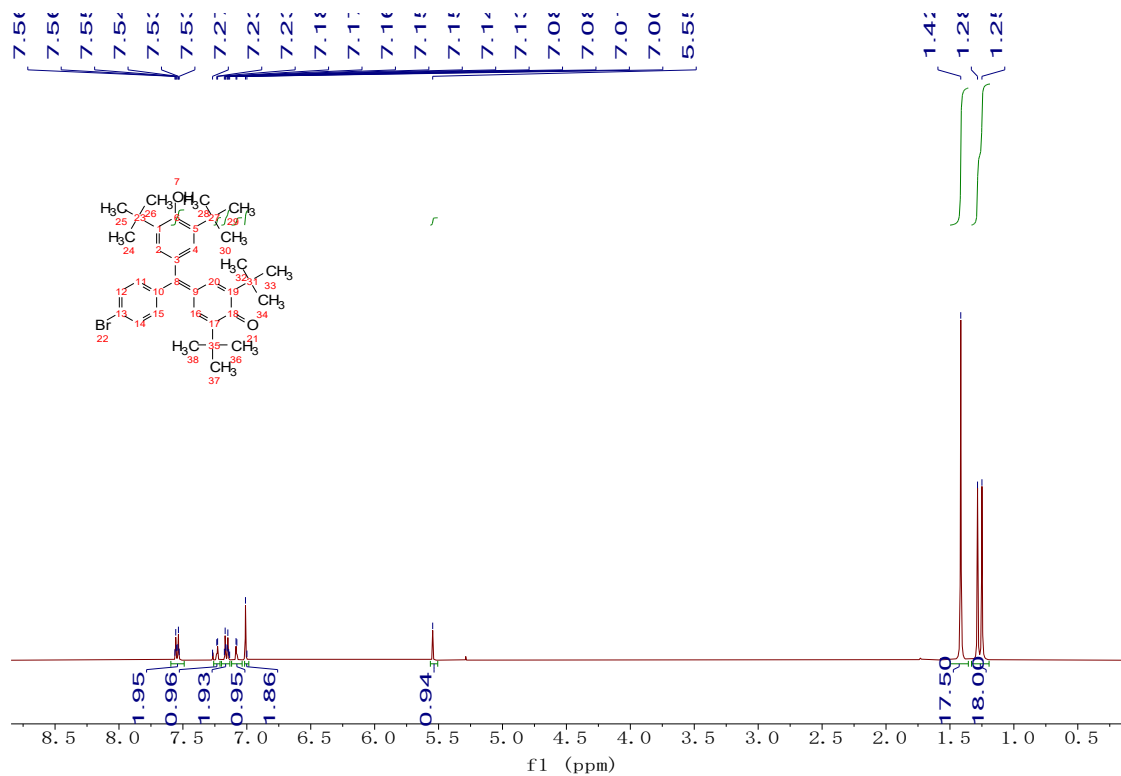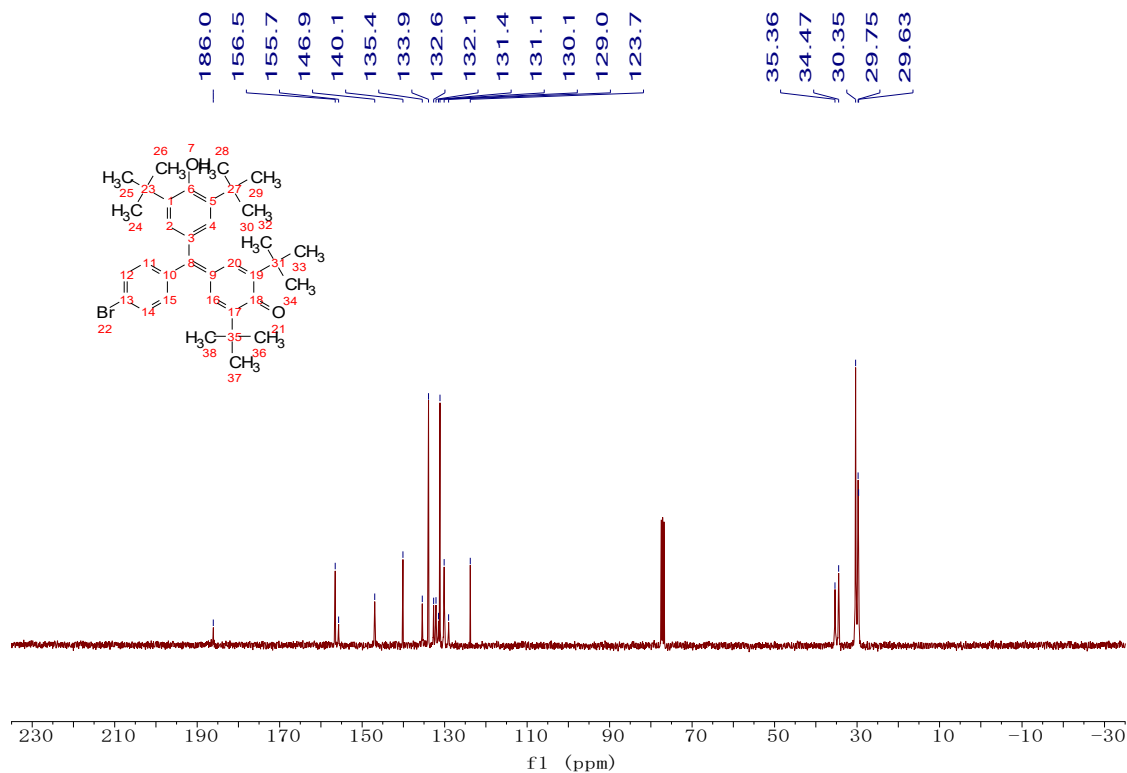

**4-((3-bromophenyl)(3,5-di-tert-butyl-4-hydroxyphenyl)methylene)-2,6-di-tert-butylcyclohexa-2,5-dien-1-one(2k)**

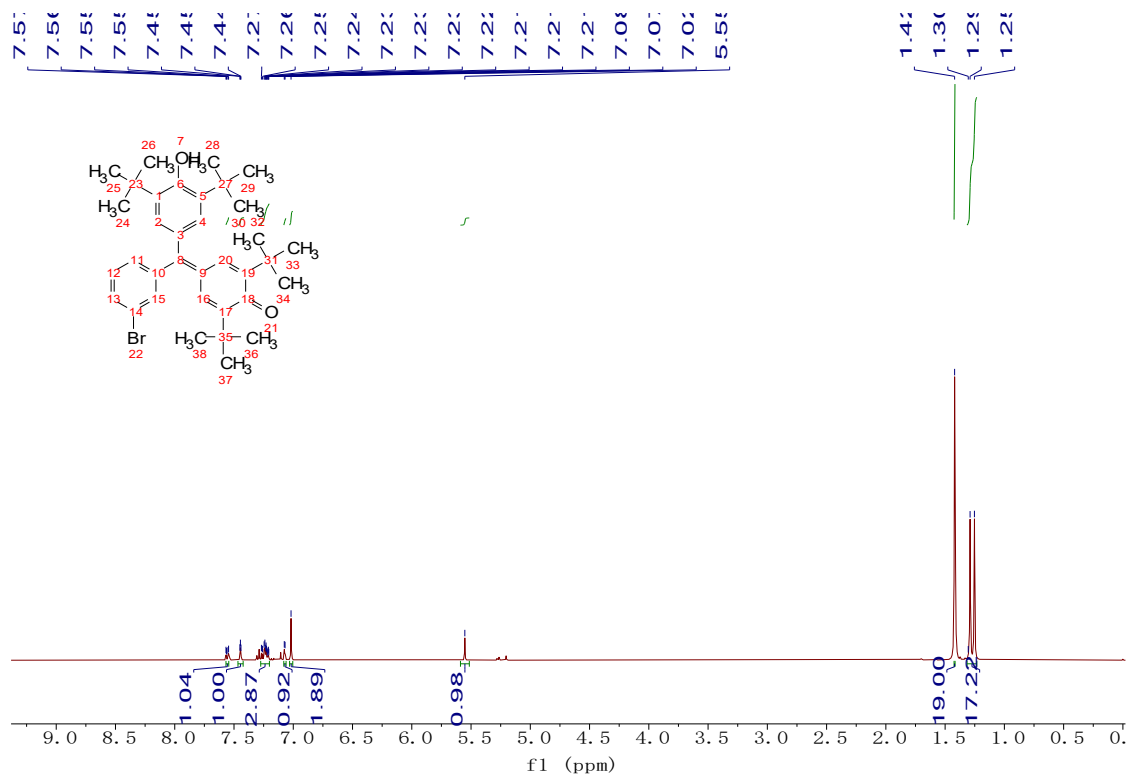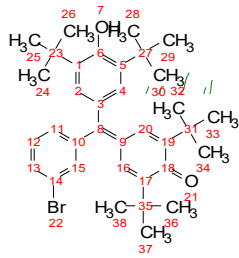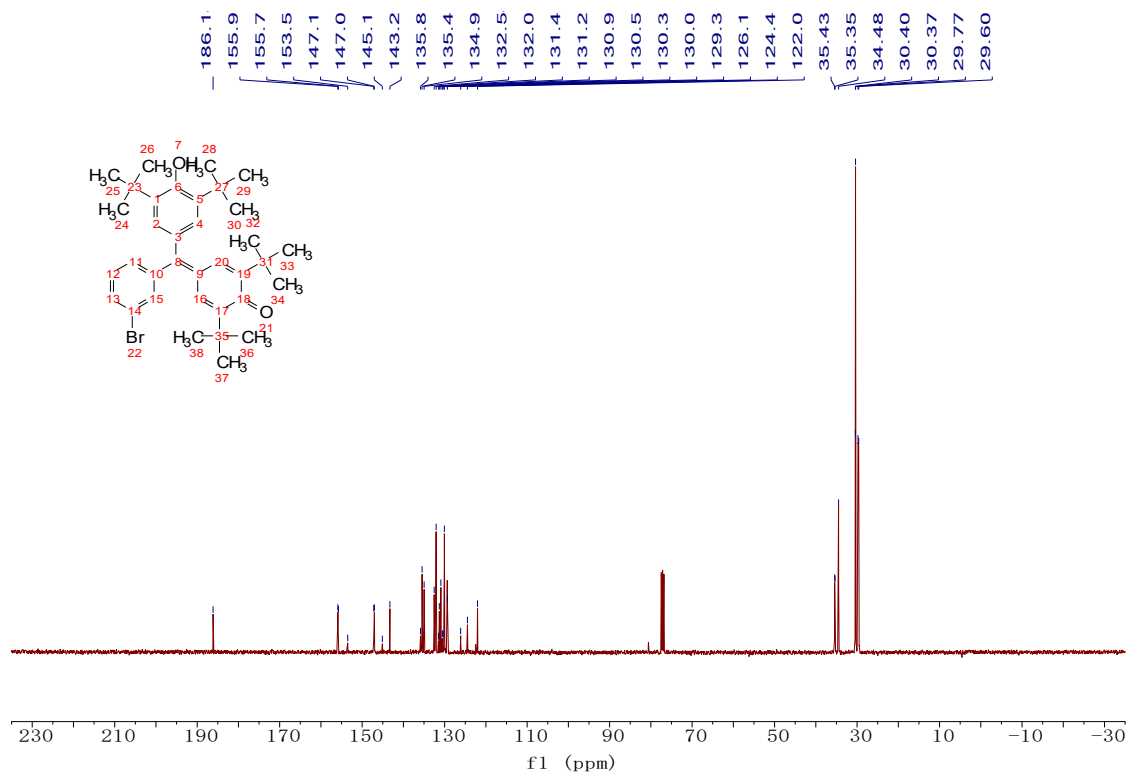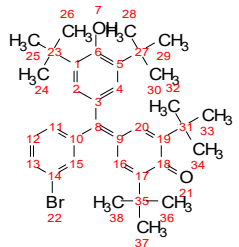

**4-((2-bromophenyl)(3,5-di-tert-butyl-4-hydroxyphenyl)methylene)-2,6-di-tert-butylcyclohexa-2,5-dien-1-one(2l)**

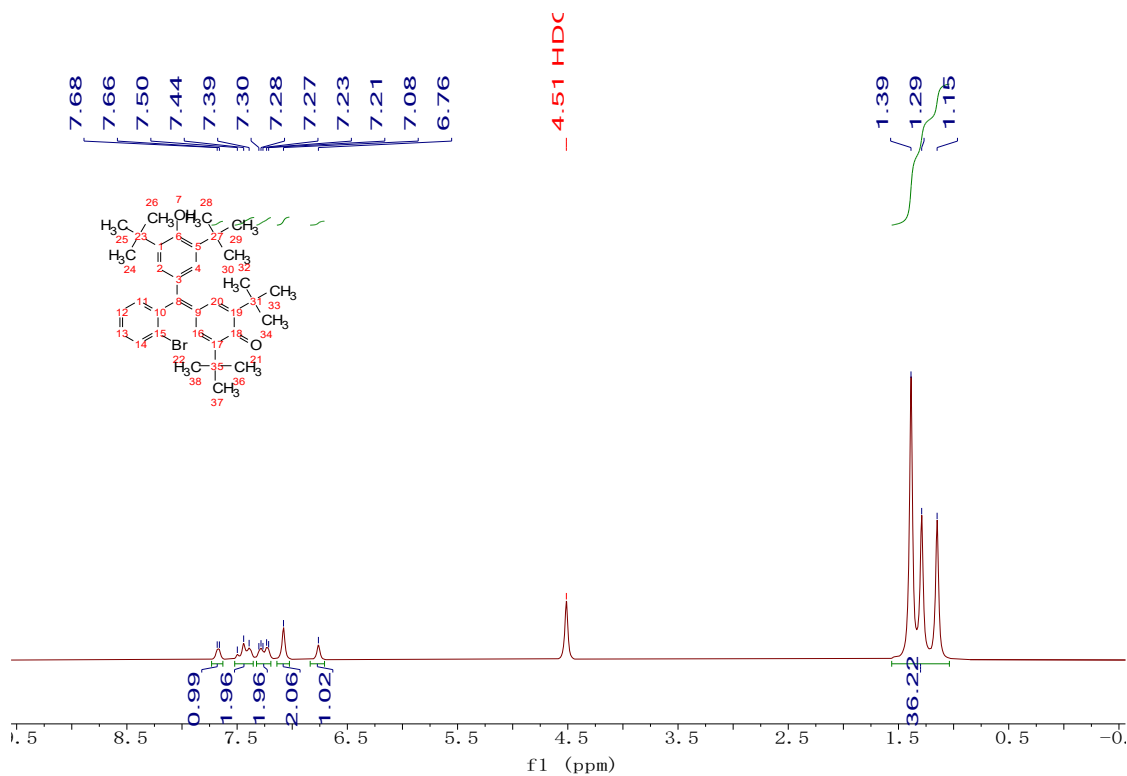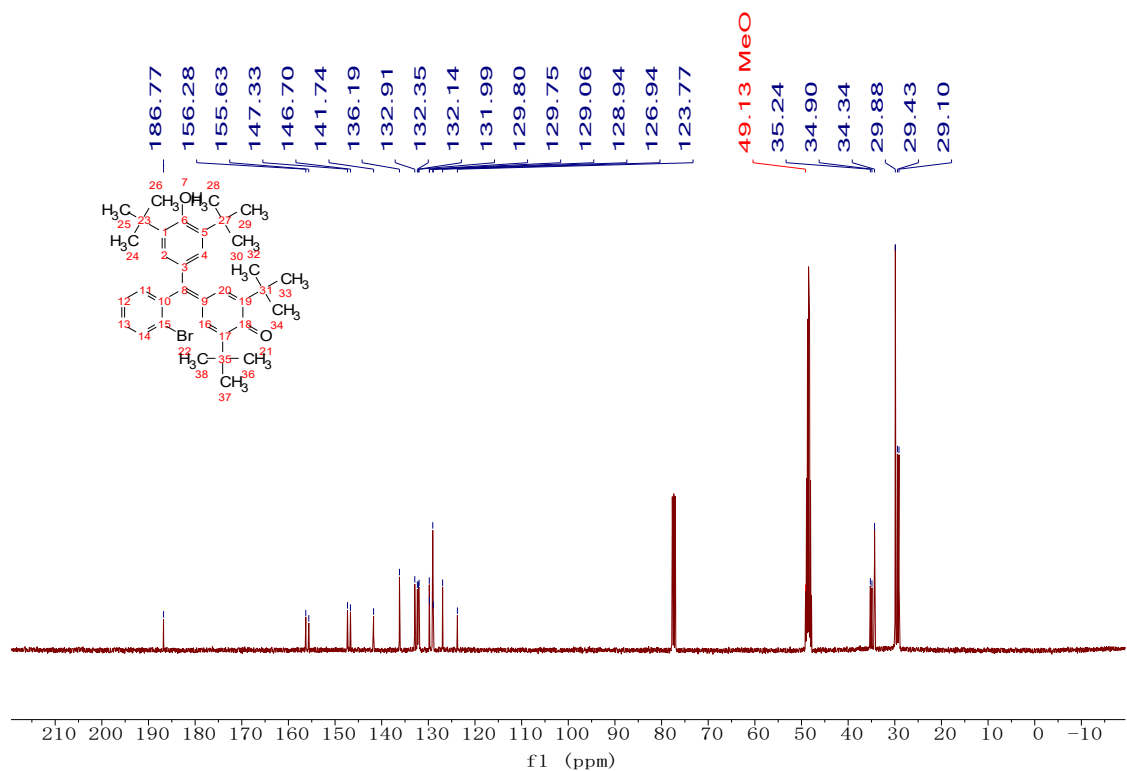



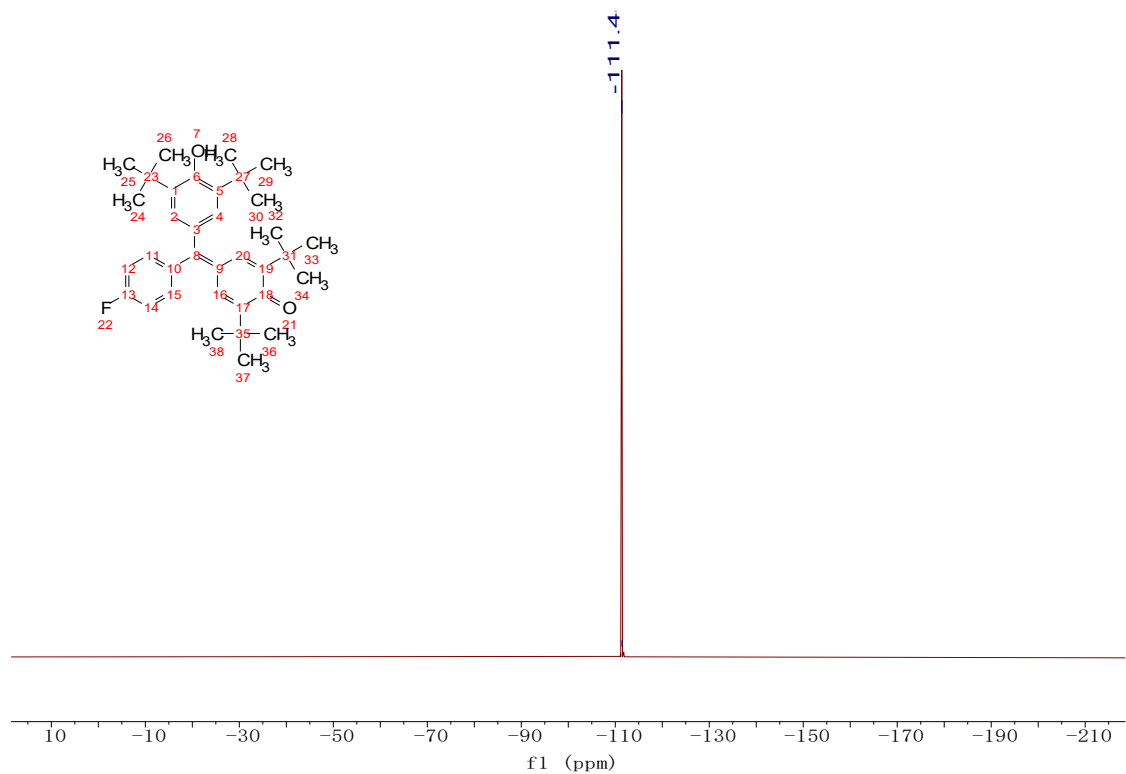

**2,6-di-tert-butyl-4-((3,5-di-tert-butyl-4-hydroxyphenyl)(2-fluorophenyl)methylene)cyclohexa-2,5-dien-1-one(2n)**

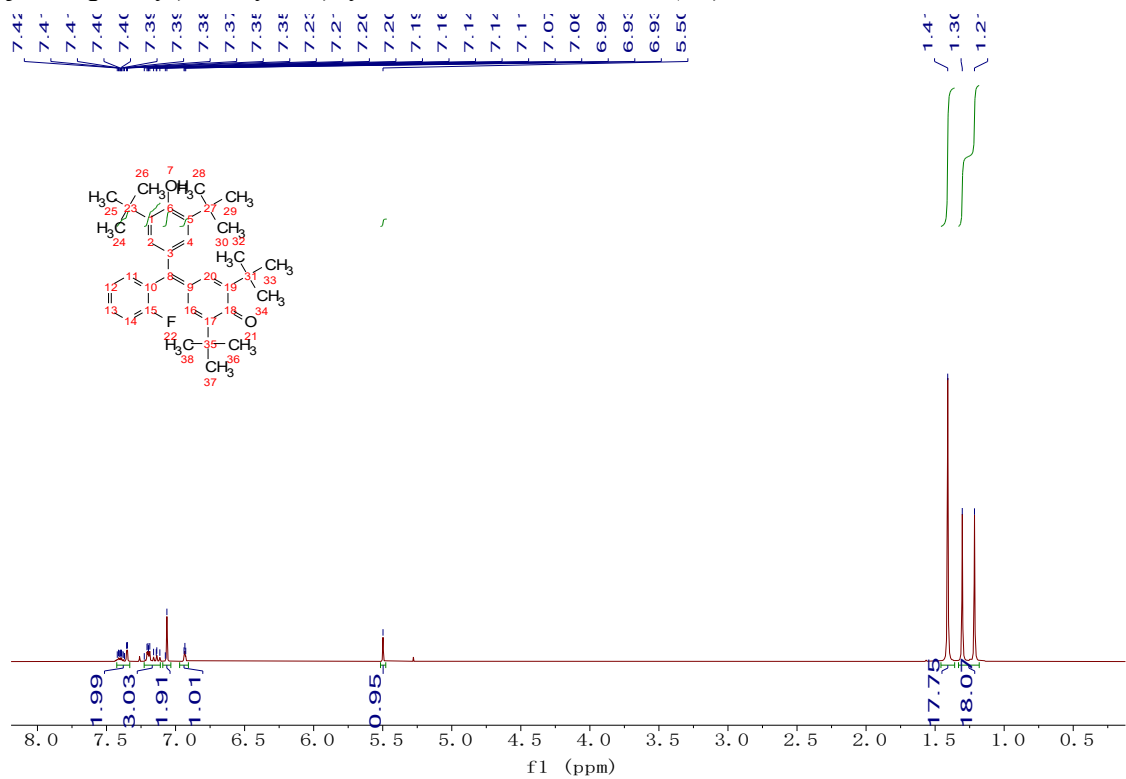

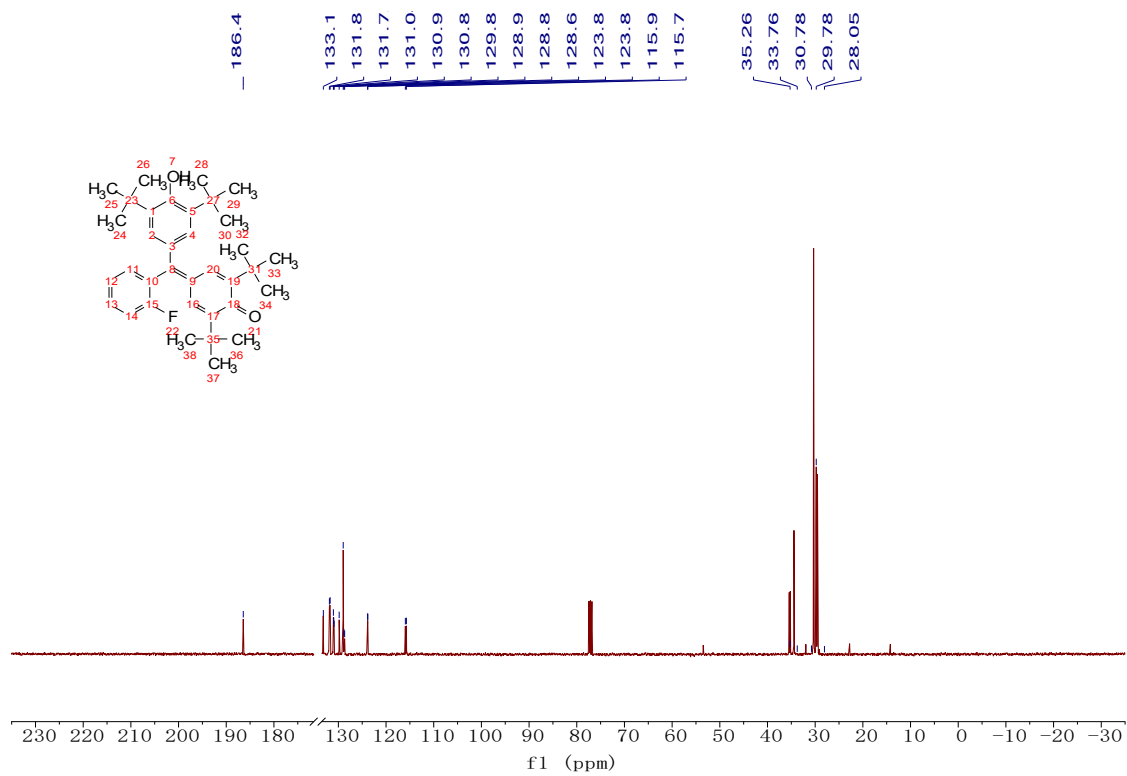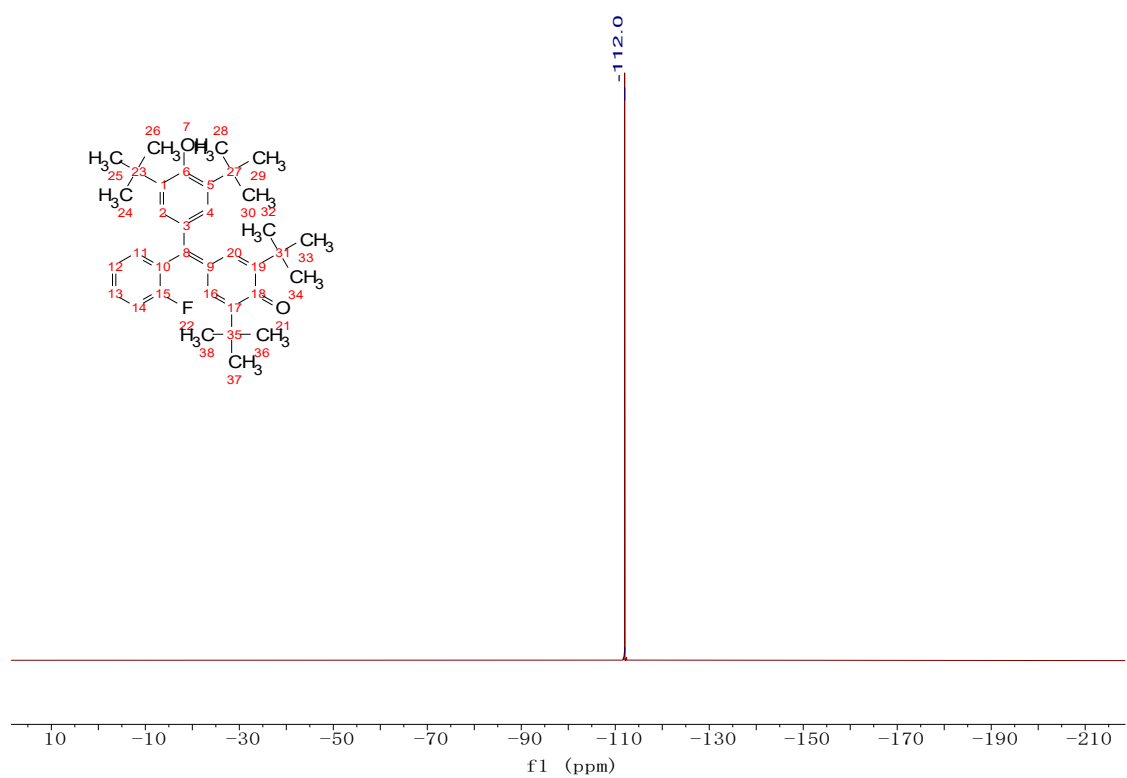



**2,6-di-tert-butyl-4-((3,5-di-tert-butyl-4-hydroxyphenyl)(2,6-dichlorophenyl)methylene)cyclohexa-2,5-dien-1-one(2o)**

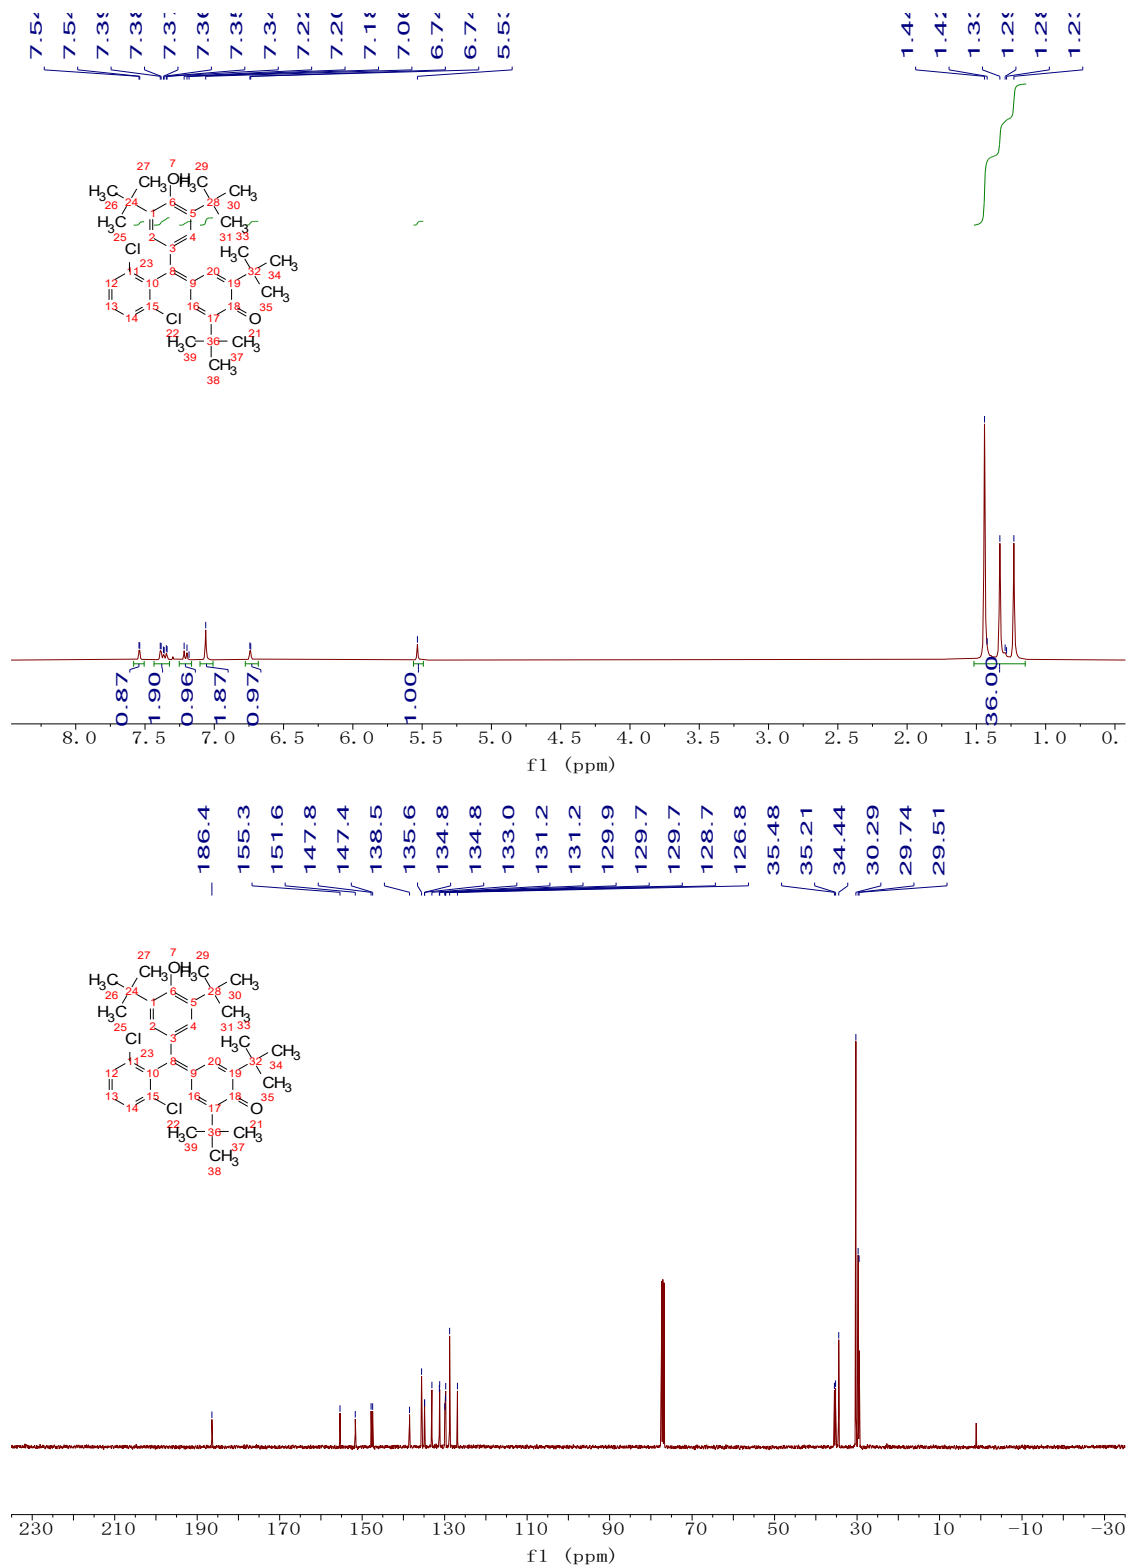

**2,6-di-tert-butyl-4-((3,5-di-tert-butyl-4-hydroxyphenyl)(4-nitrophenyl)methylene)cyclohexa-2,5-dien-1-one(2p)**

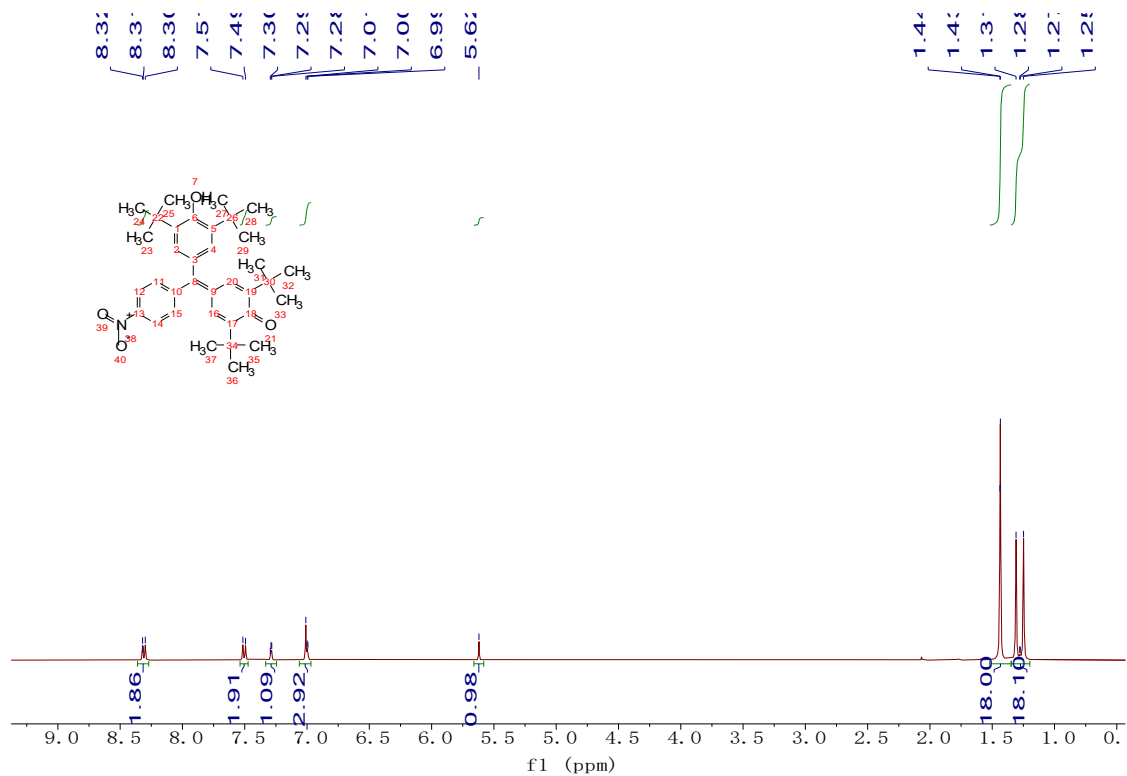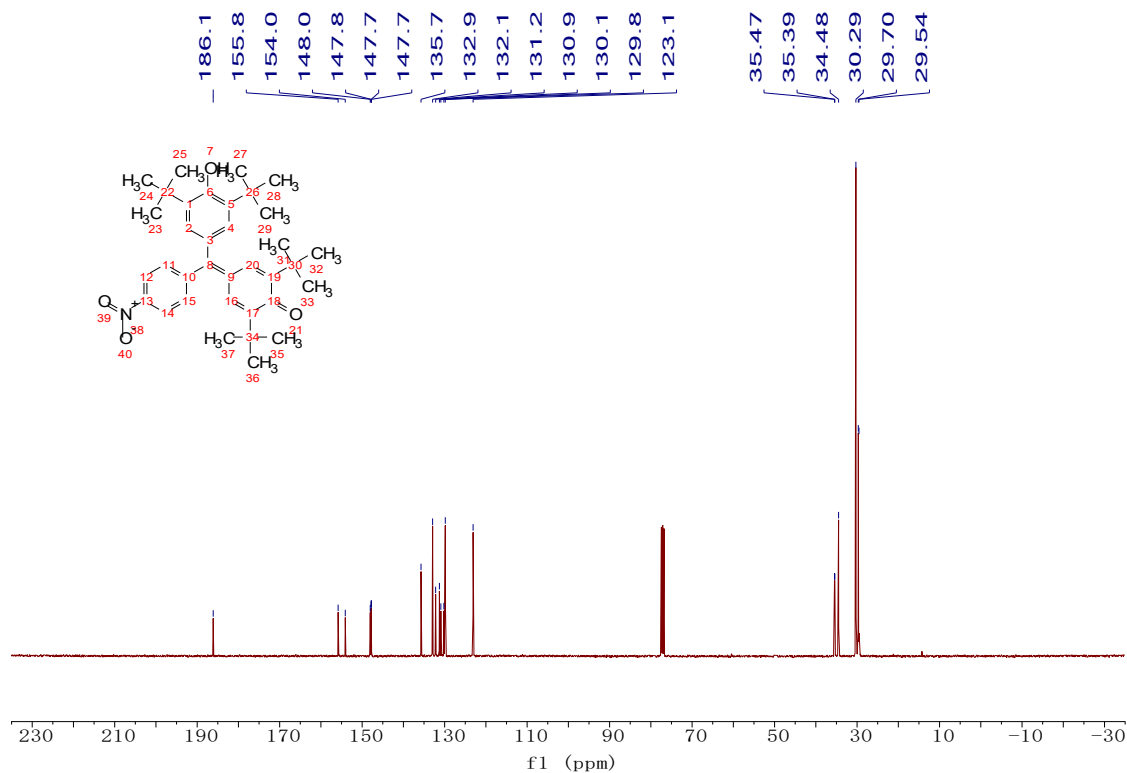

**2,6-di-tert-butyl-4-((3,5-di-tert-butyl-4-hydroxyphenyl)(2-nitrophenyl)methylene)cyclohexa-2,5-dien-1-one(2q)**

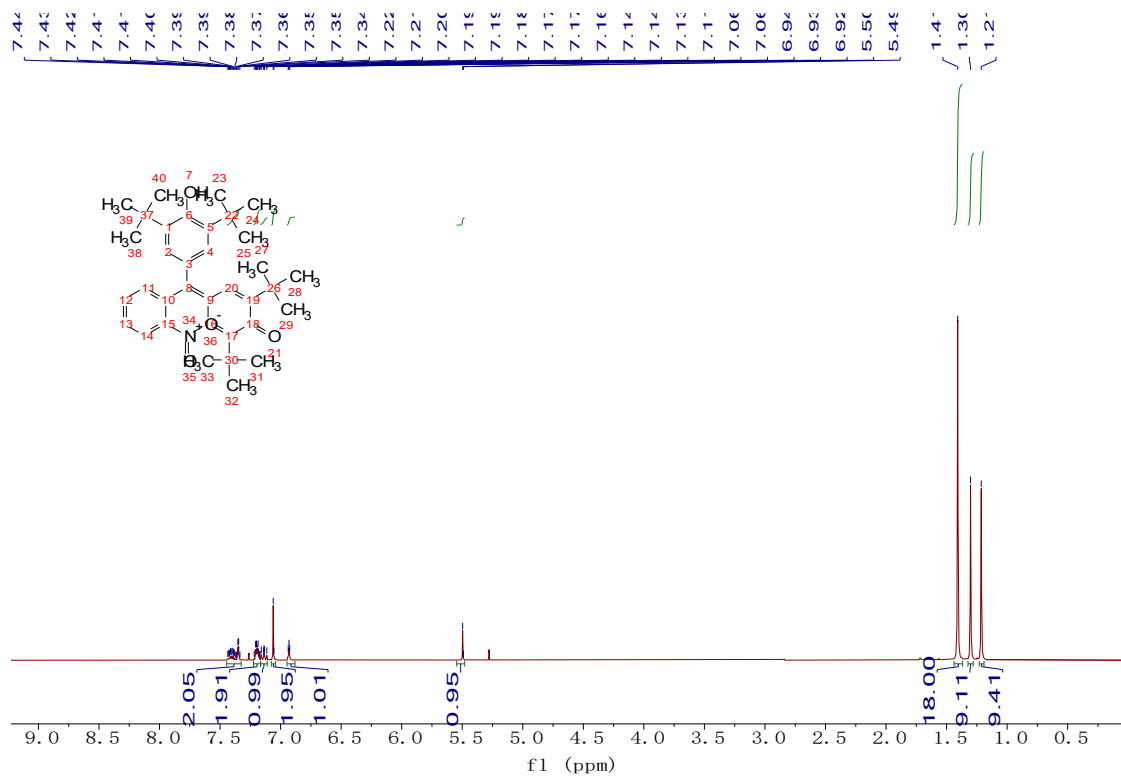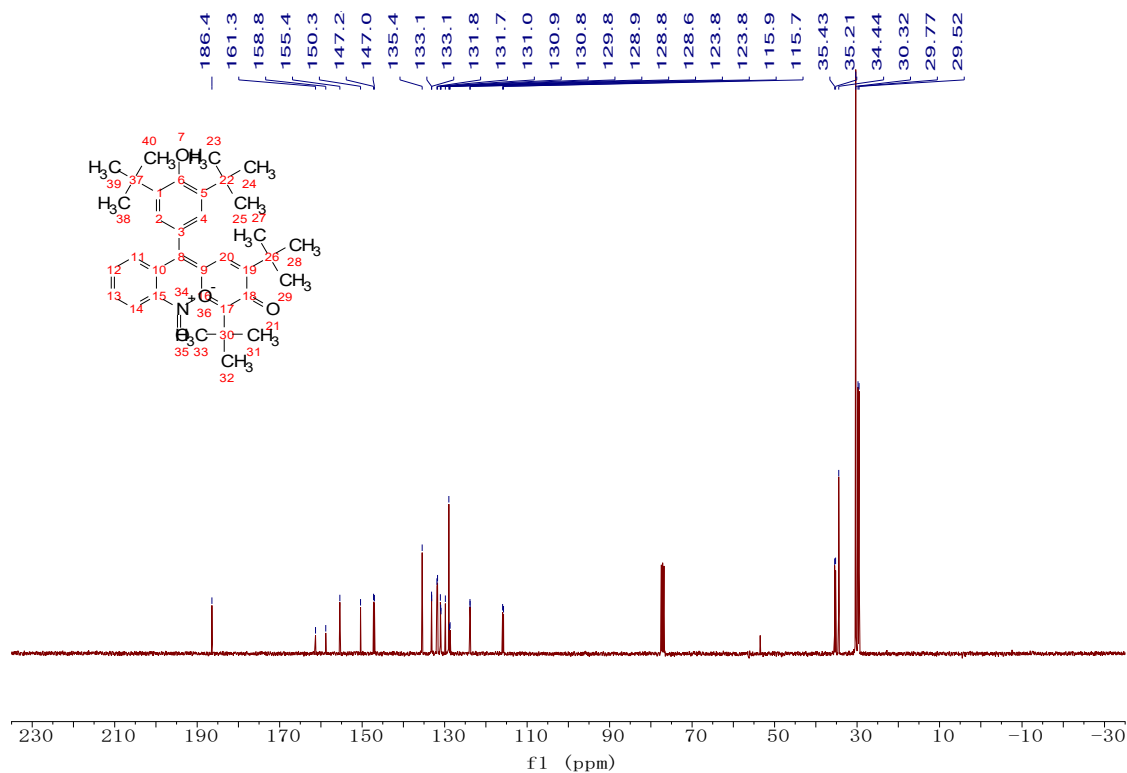

**2,6-di-tert-butyl-4-((3,5-di-tert-butyl-4-hydroxyphenyl)(4-isocyanophenyl)methylene)cyclohexa-2,5-dien-1-one(2r)**

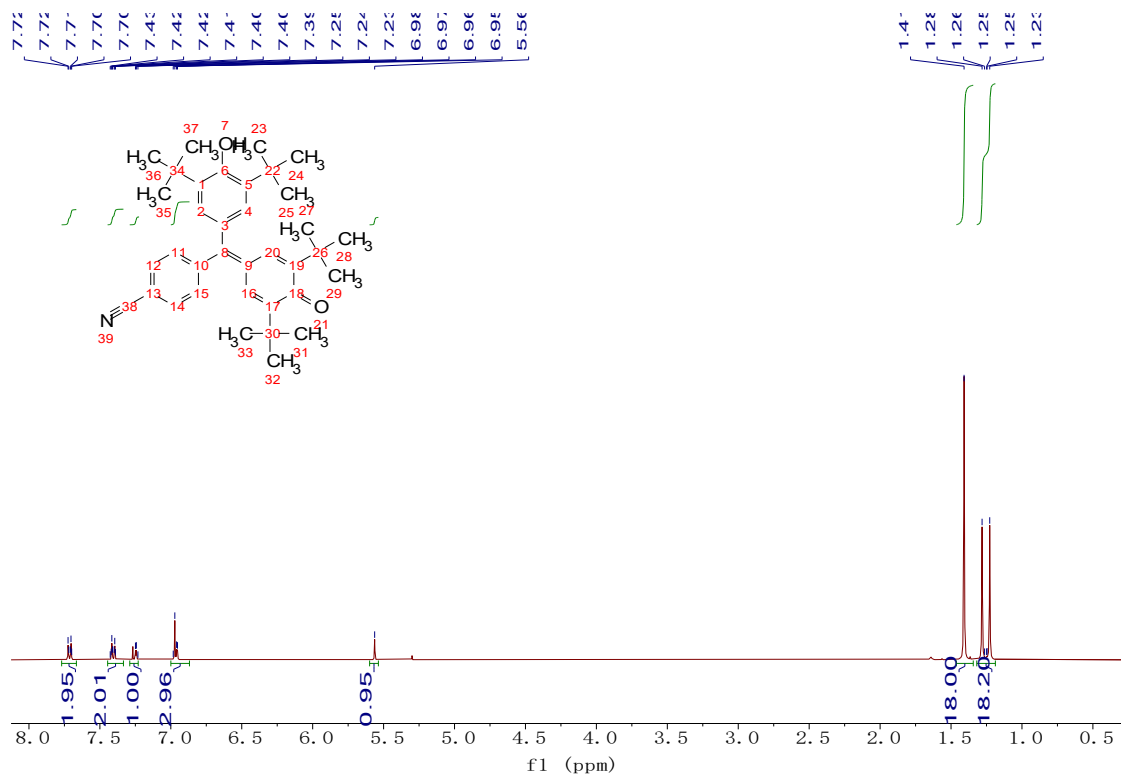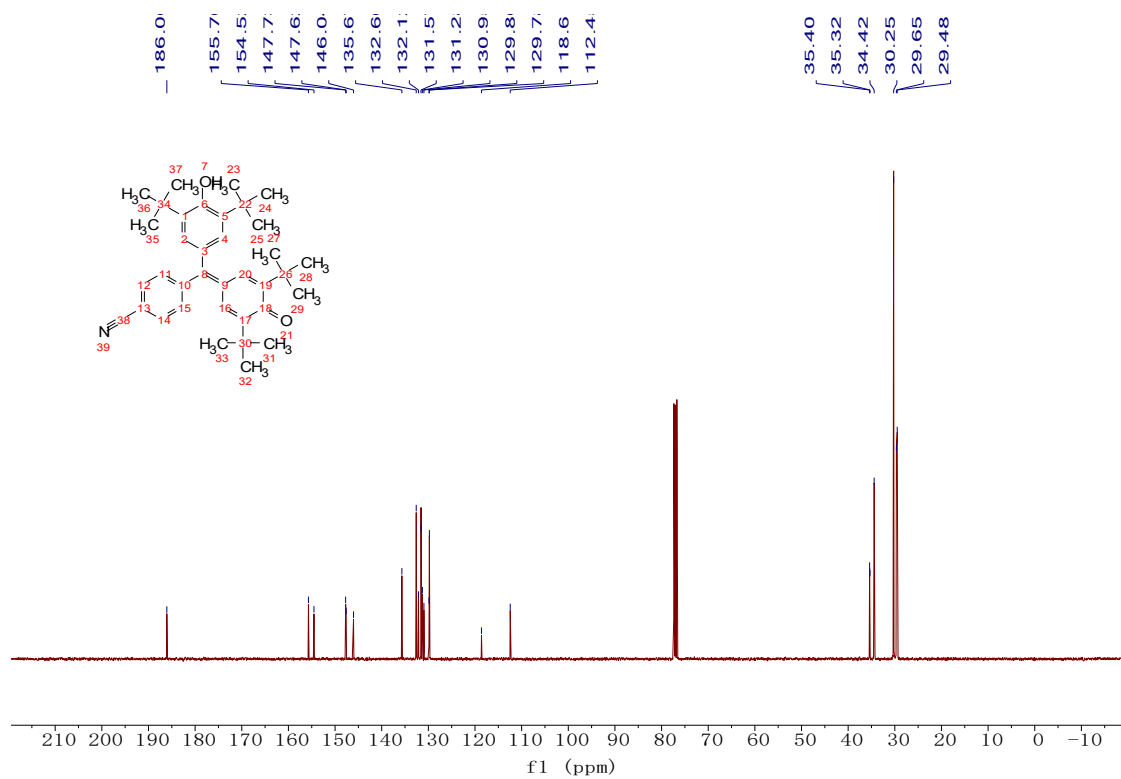

**2,6-di-tert-butyl-4-((3,5-di-tert-butyl-4-hydroxyphenyl)(thiophen-2-yl)methylene)cyclohexa-2,5-dien-1-one(2s)**

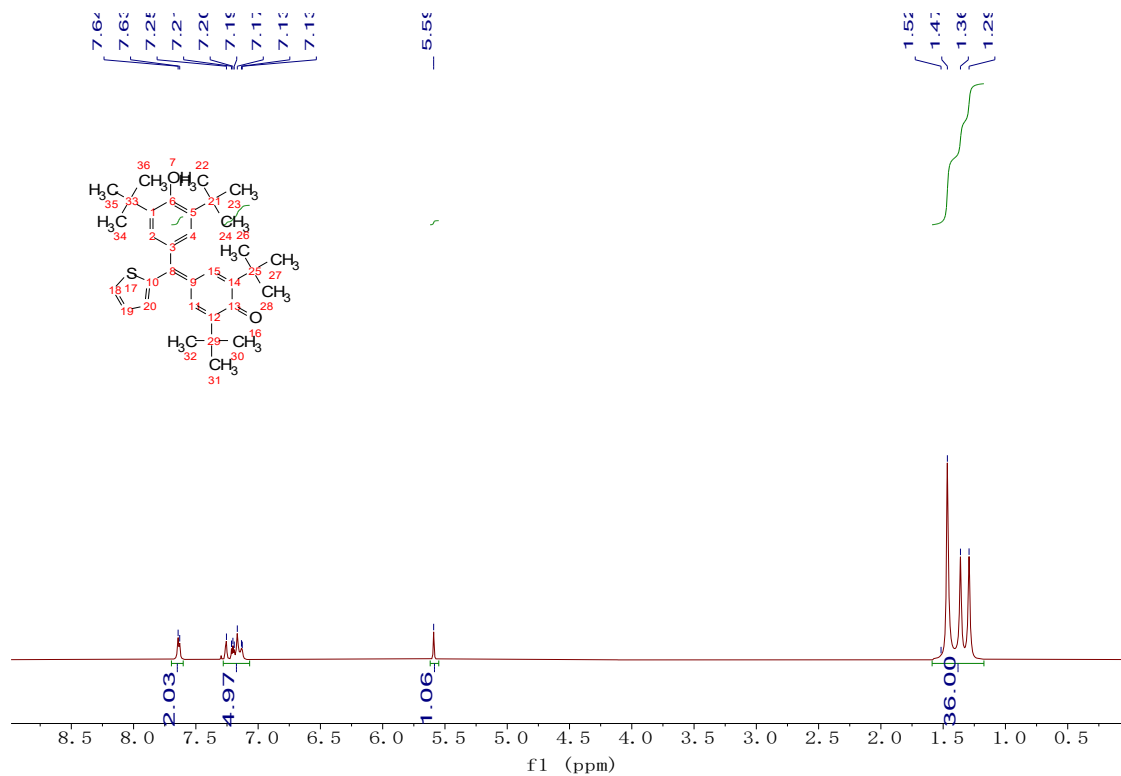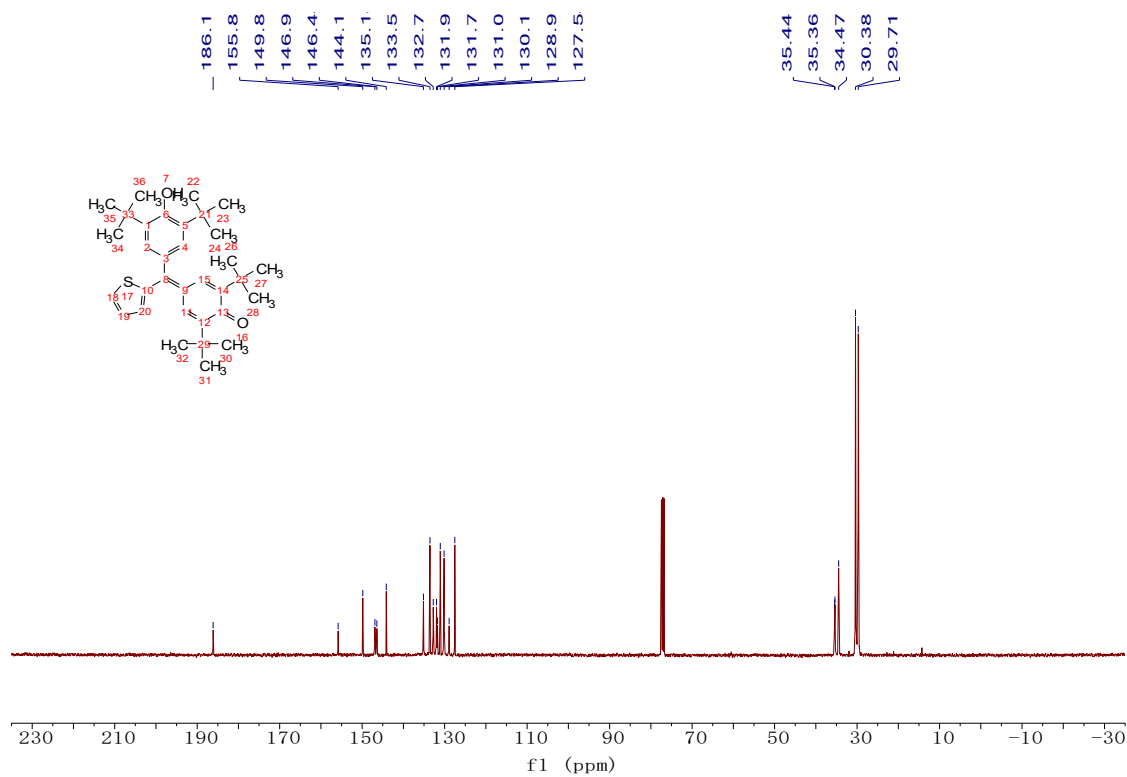

**2,6-di-tert-butyl-4-((3,5-di-tert-butyl-4-hydroxyphenyl)(pyridin-2-yl)methylene)cyclohexa-2,5-dien-1-oen(2t)**

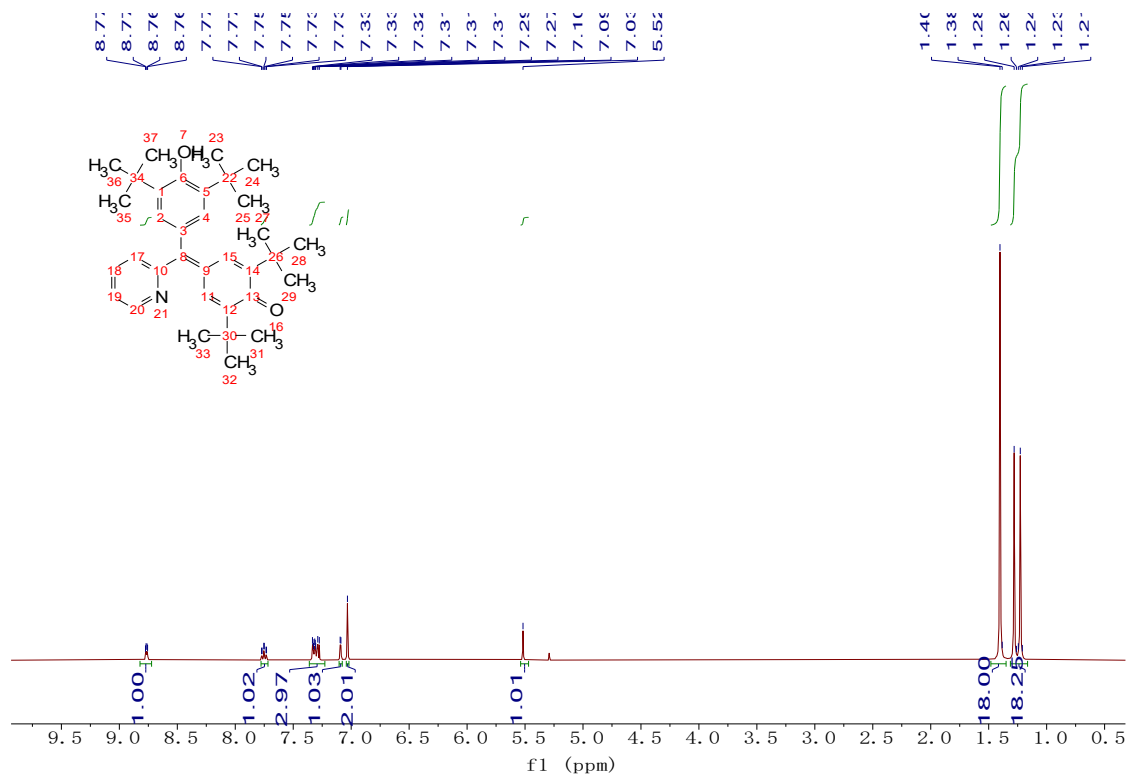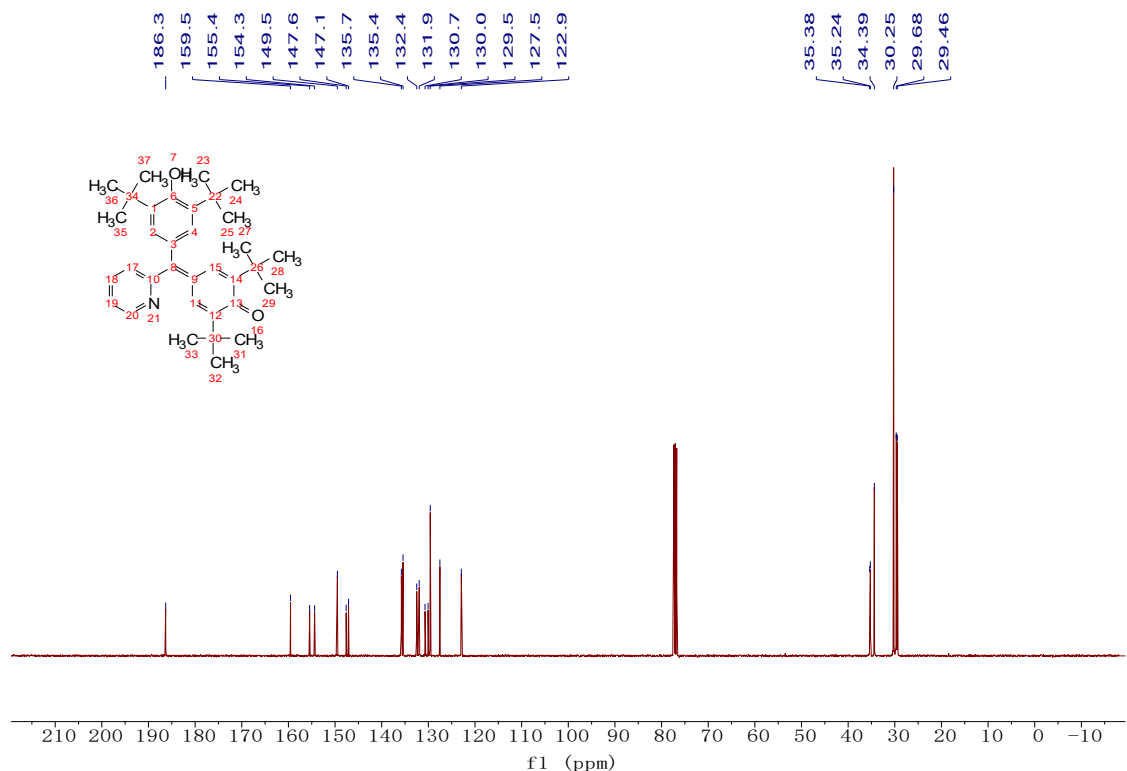

**2,6-di-tert-butyl-4-((3,5-di-tert-butyl-4-hydroxyphenyl)(naphthalen-2-yl)methylene)cyclohexa-2,5-dien-1-one(2u)**

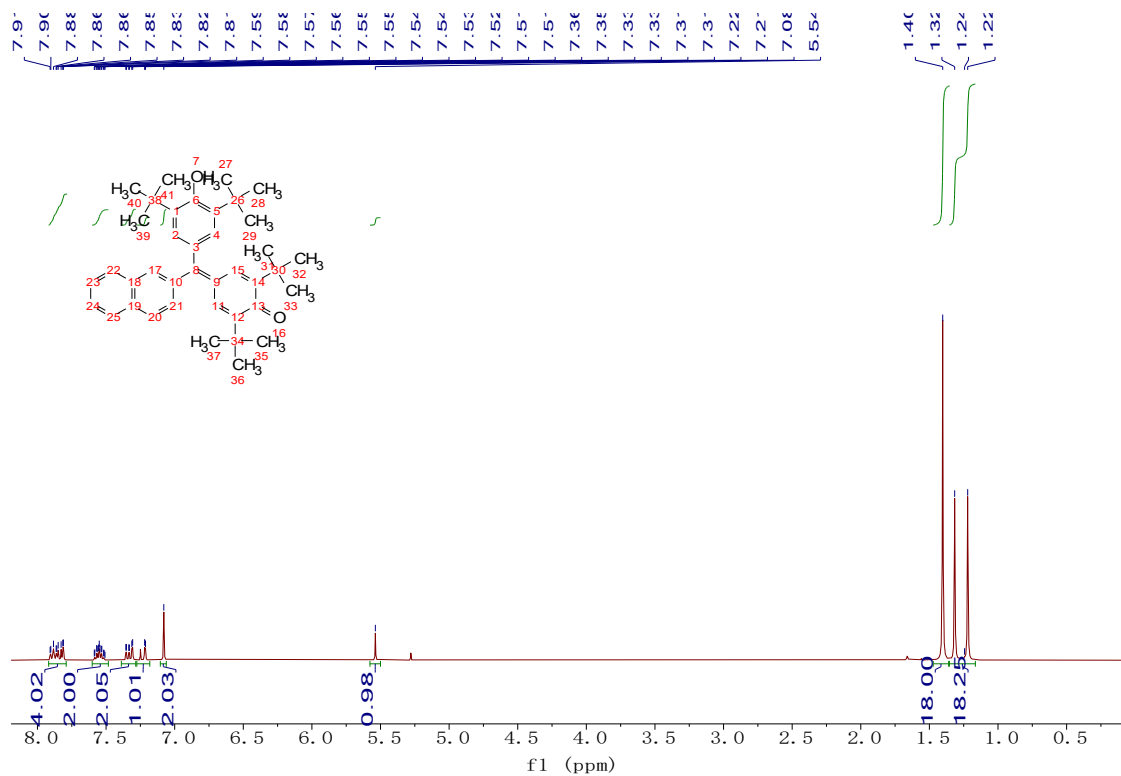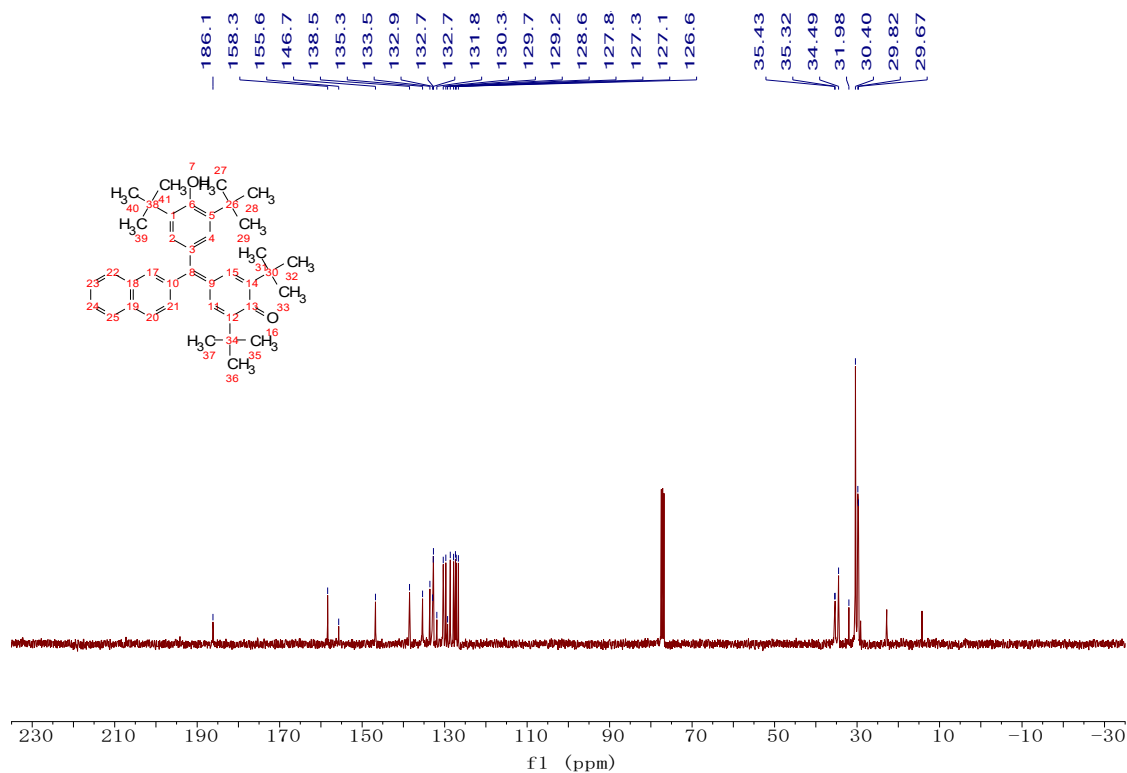

**4-((4-hydroxy-3,5-diisopropylphenyl)methylene)-2,6-diisopropylcyclohexa-2,5-dien-1-one(2v)**

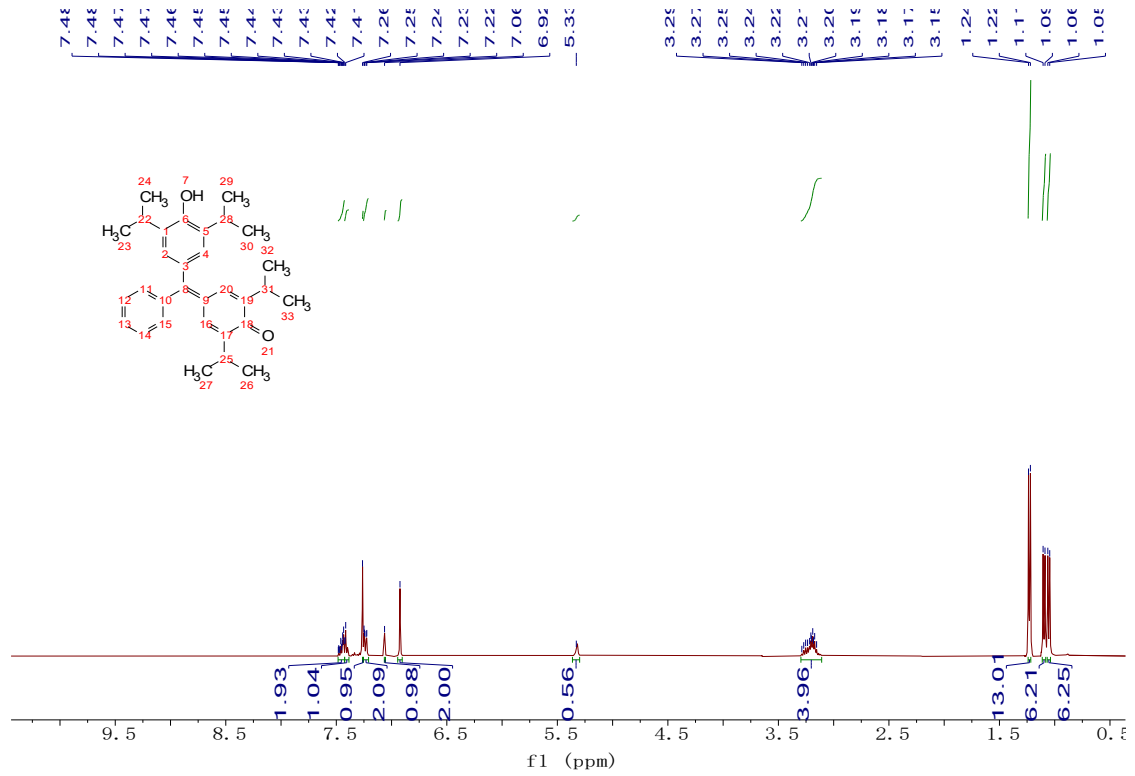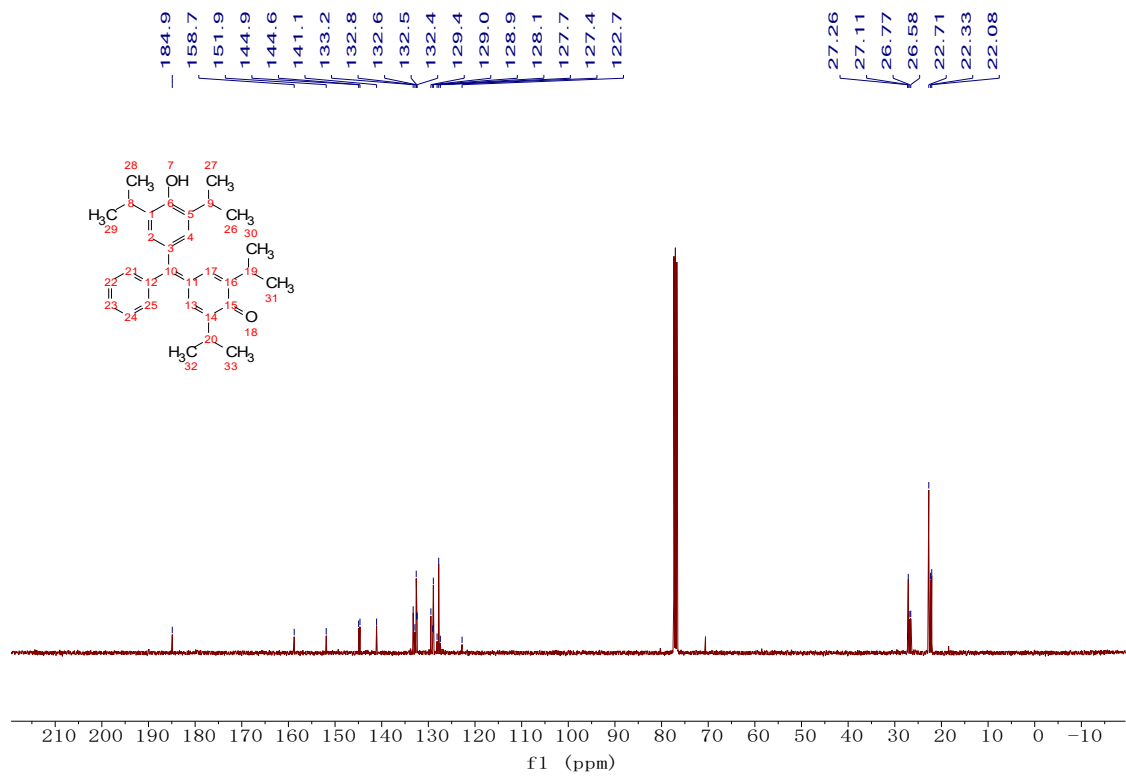



**4-((4-hydroxy-3,5-diisopropylphenyl)(p-tolyl)methylene)-2,6-diisopropylcyclohexa-2,5-dien-1-one(2w)**

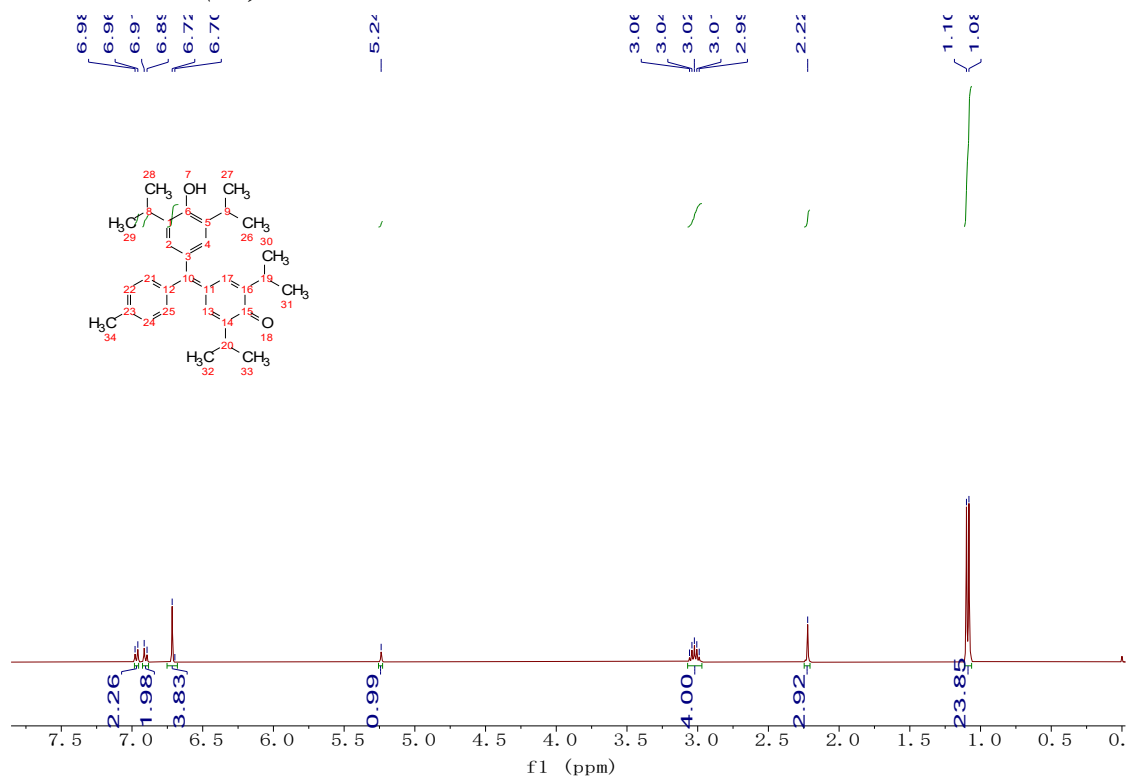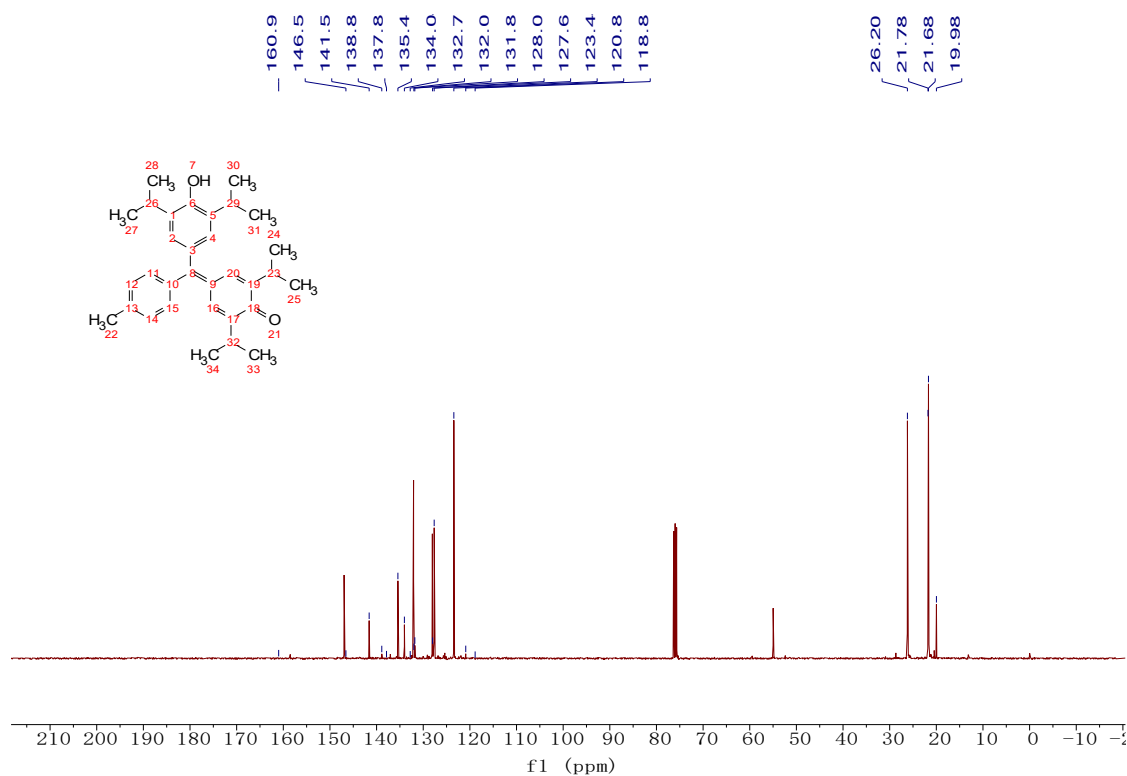

**4-((4-bromophenyl)(4-hydroxy-3,5-diisopropylphenyl)methylene)-2,6-diisopropylcyclohexa-2,5-dien-1-one(2x)**

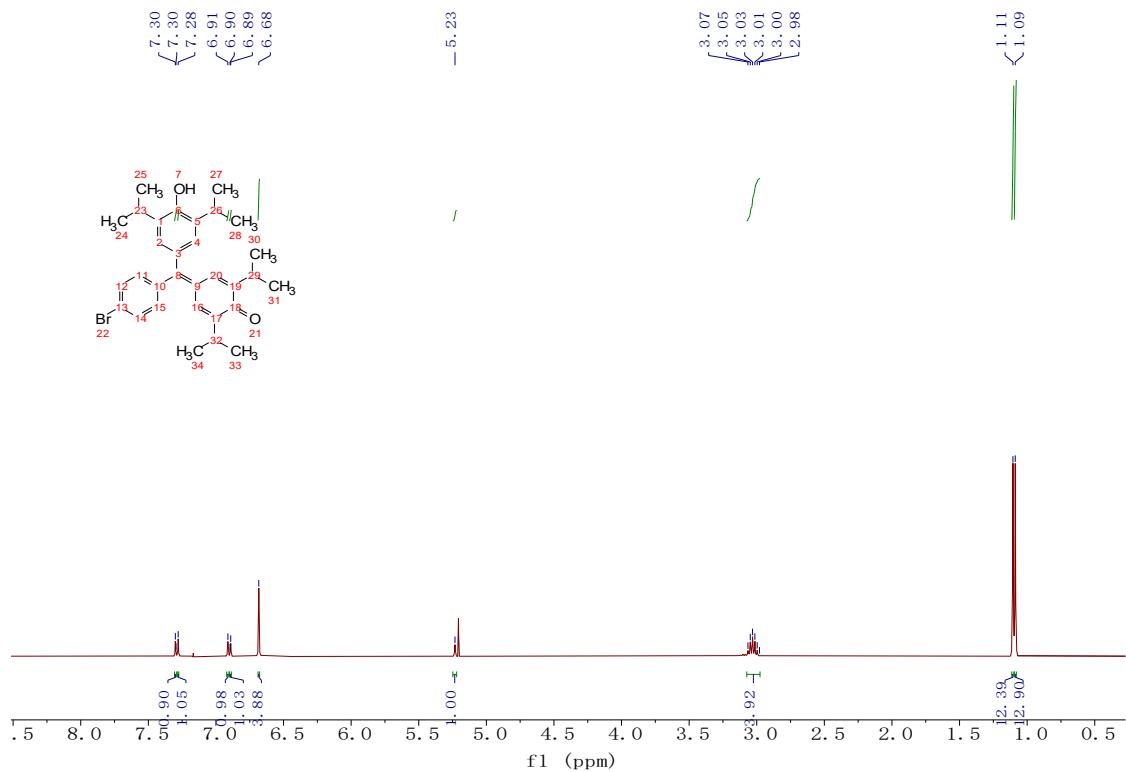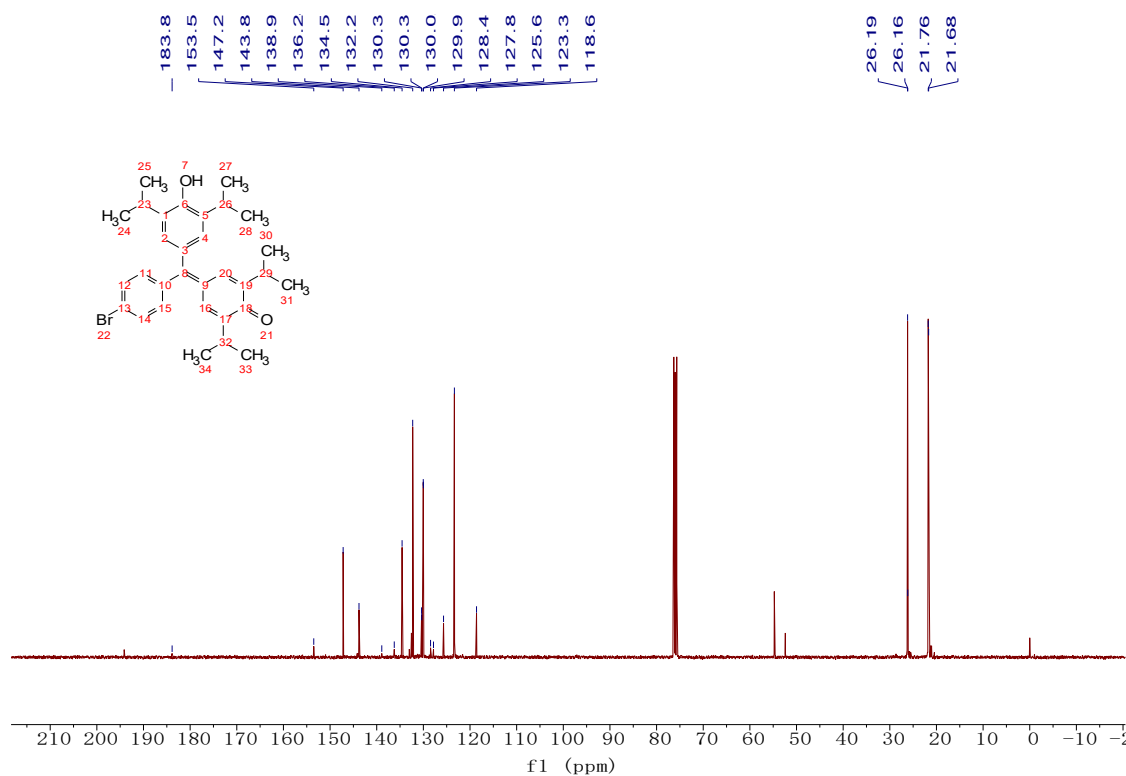

**4-((3,5-di-tert-butyl-4-hydroxyphenyl)(phenyl)methylene)-2,6-diisopropylcyclohexa-2,5-dien-1-one(2y)**

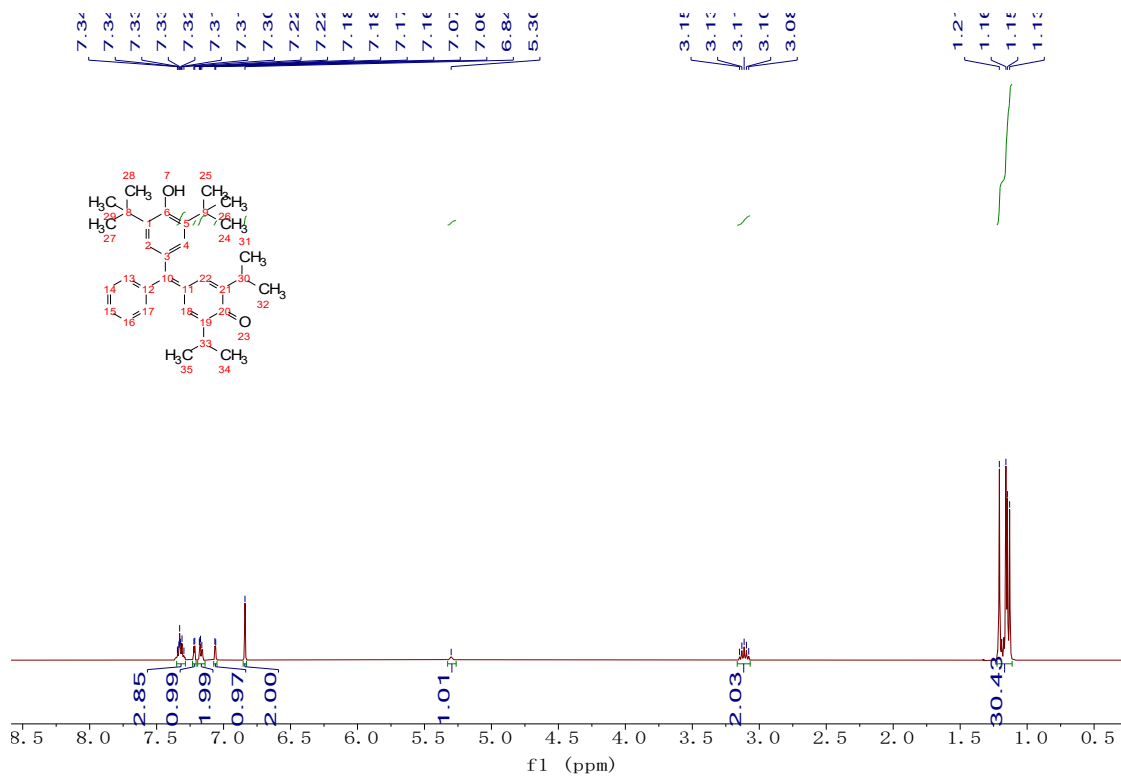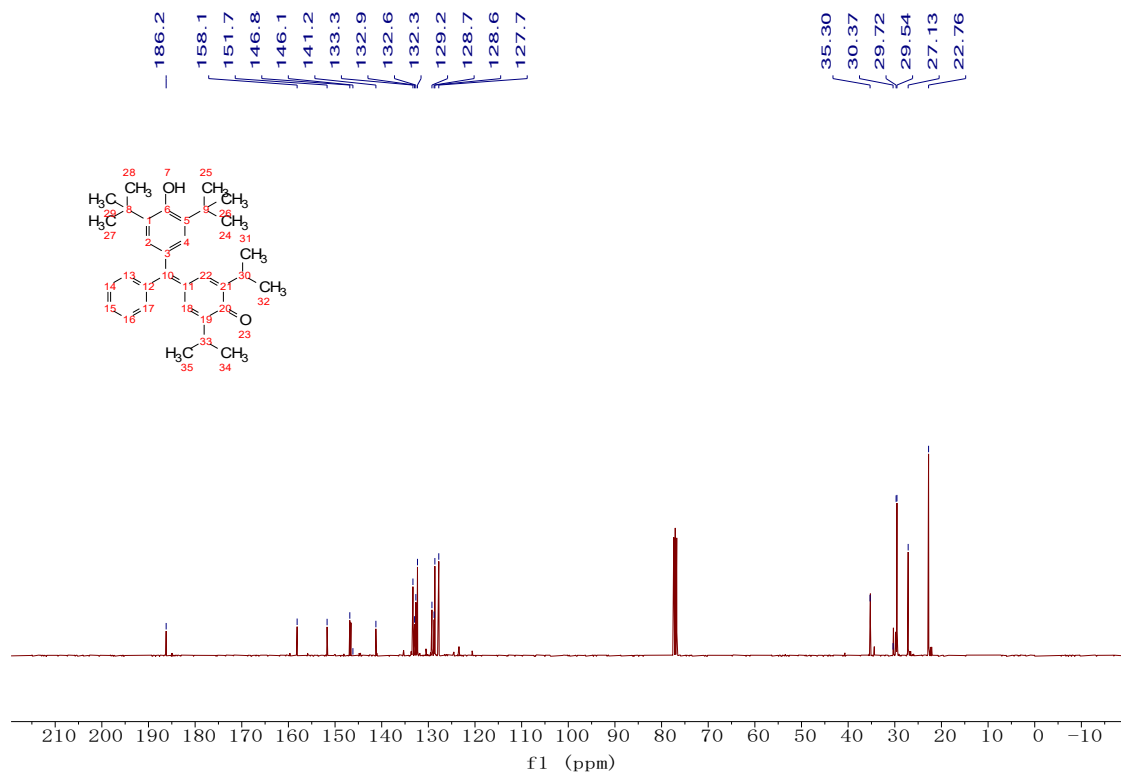

**4-((4-bromophenyl)(3,5-di-tert-butyl-4-hydroxyphenyl)methylene)-2,6-diisopropylcyclohexa-2,5-dien-1-one(2z)**

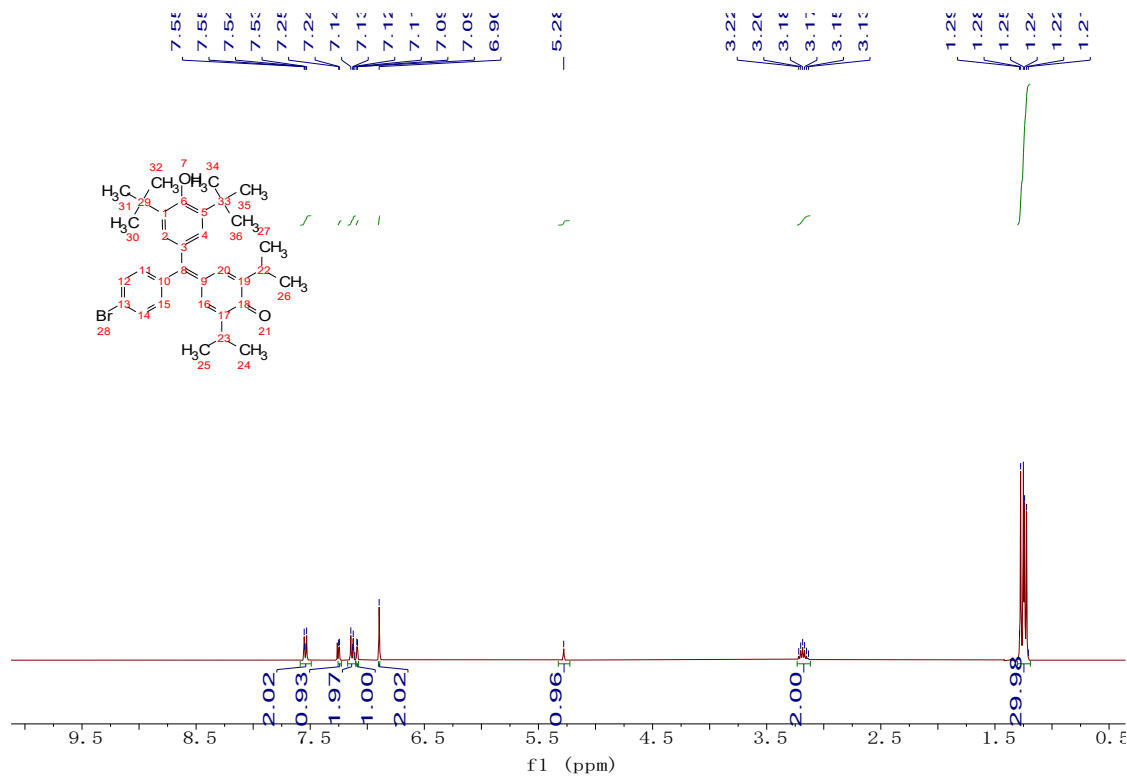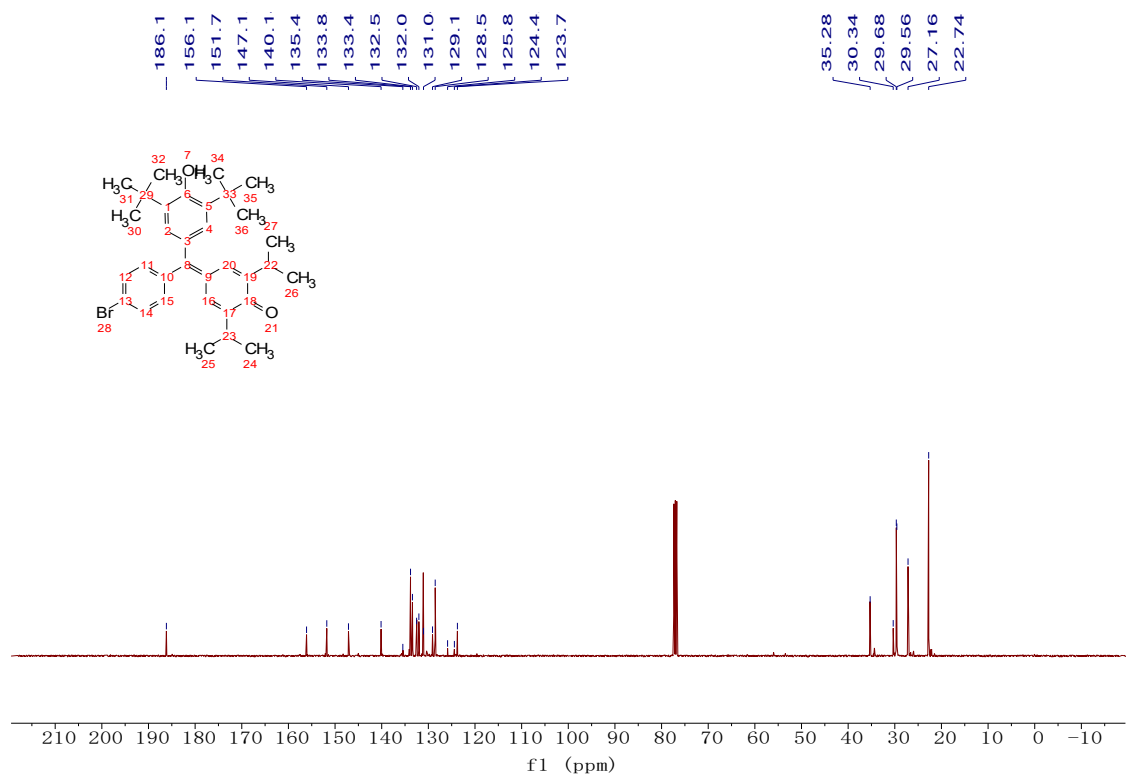

**4-((3,5-di-tert-butyl-4-hydroxyphenyl)(p-tolyl)methylene)-2,6-diisopropylcyclohexa-2,5-dien-1-one(2aa)**

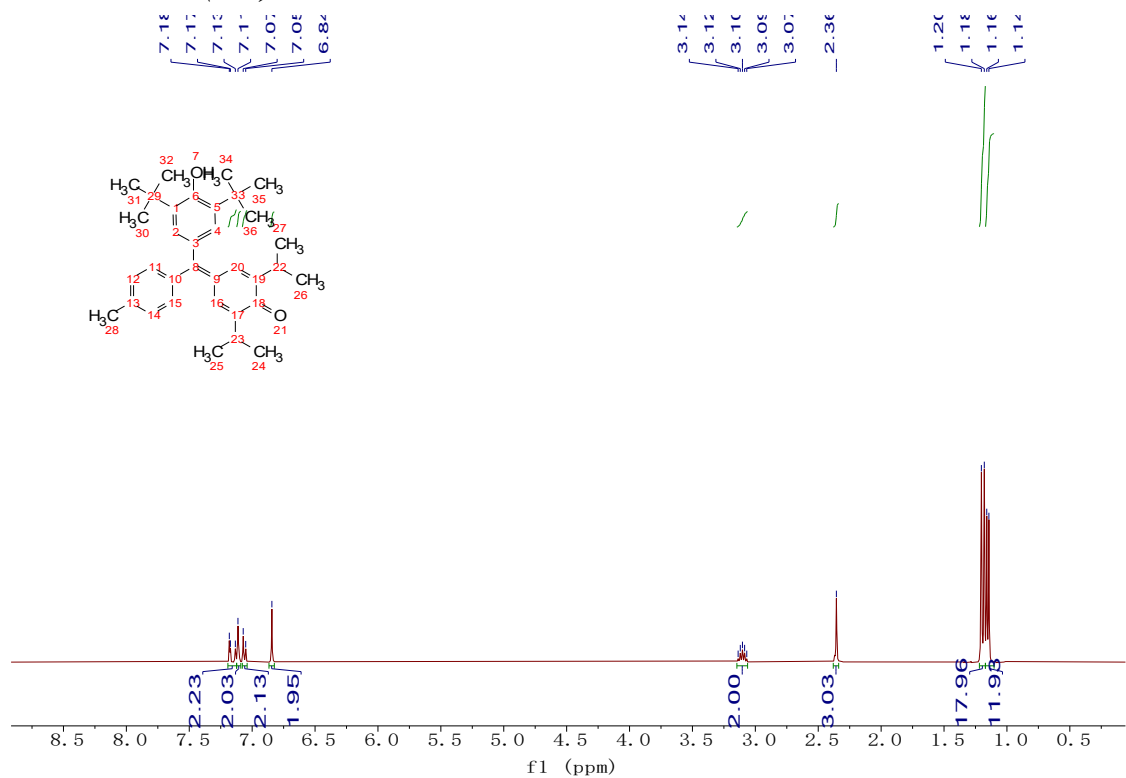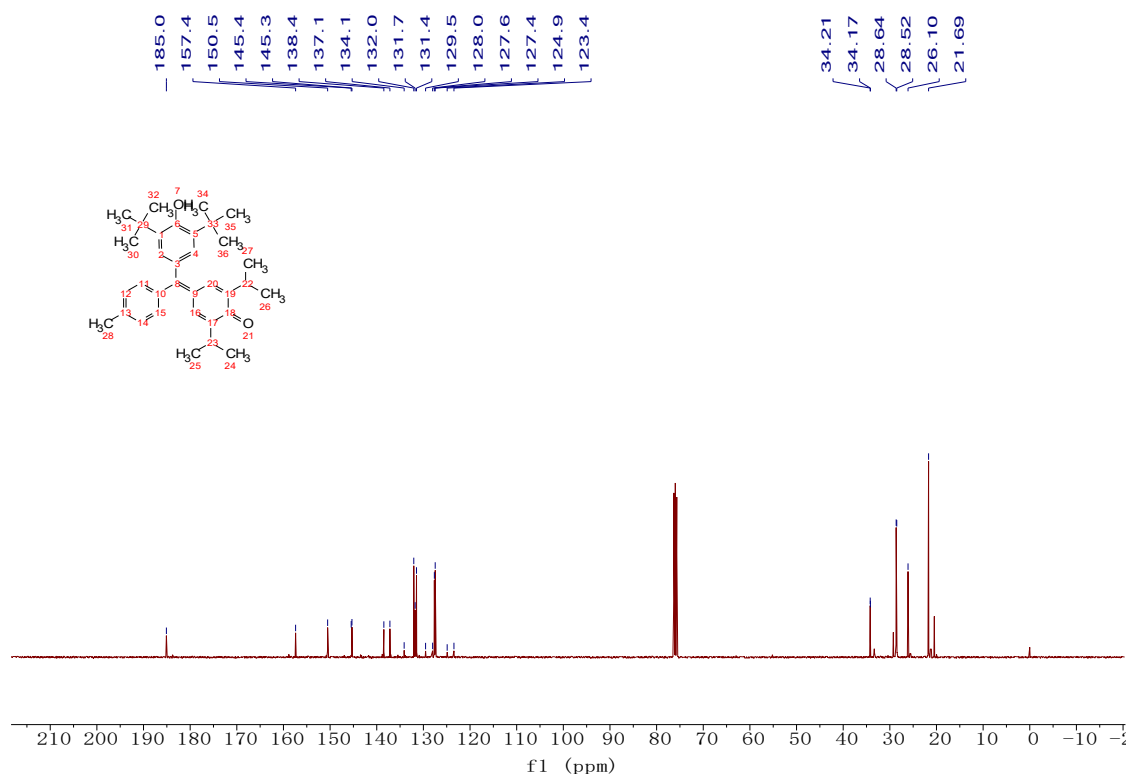

**4-((3,5-di-tert-butyl-4-hydroxyphenyl)(m-tolyl)methylene)-2,6-diisopropylcyclohexa-2,5-dien-1-one(2ab)**

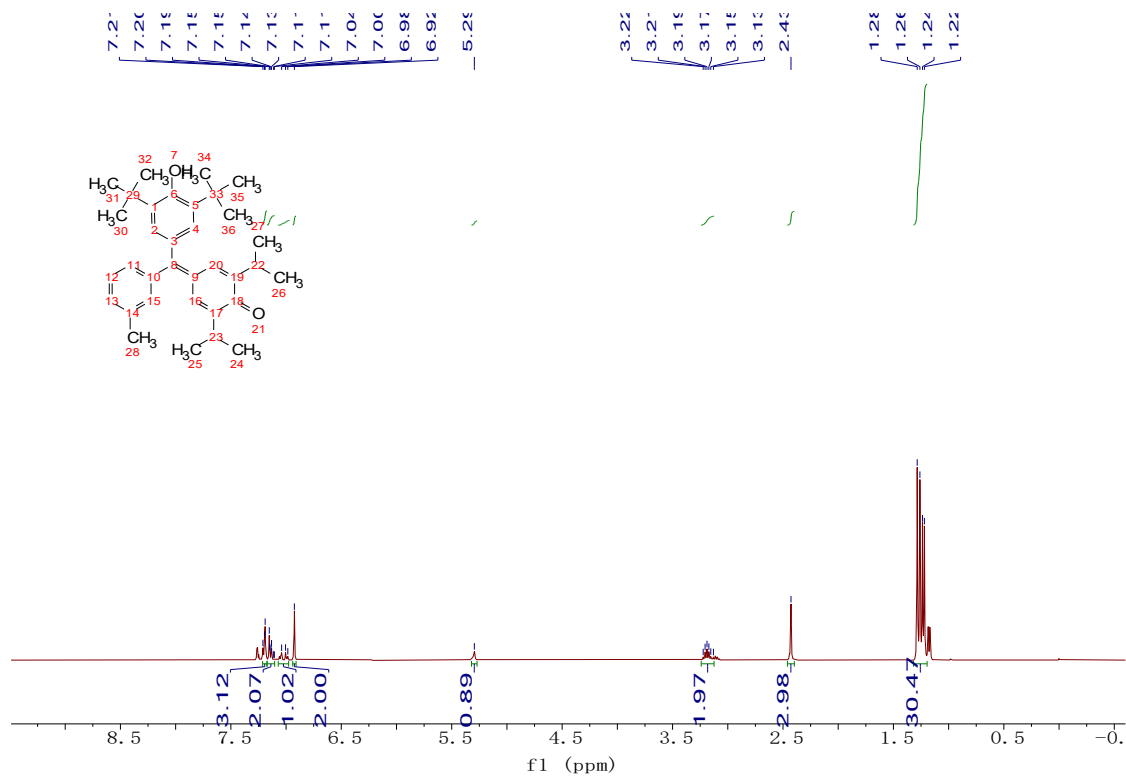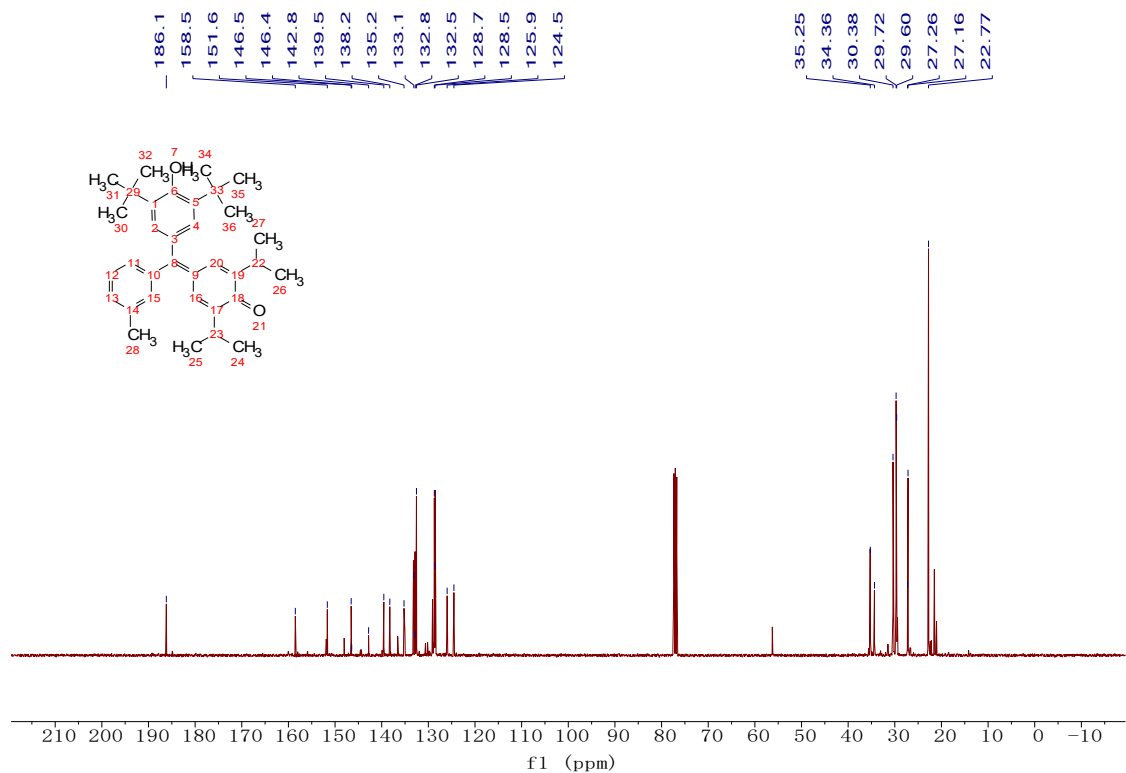

**4-((3,5-di-tert-butyl-4-hydroxyphenyl)(3-methoxyphenyl)methylene)-2,6-diisopropylcyclohexa-2,5-dien-1-one(2ac)**

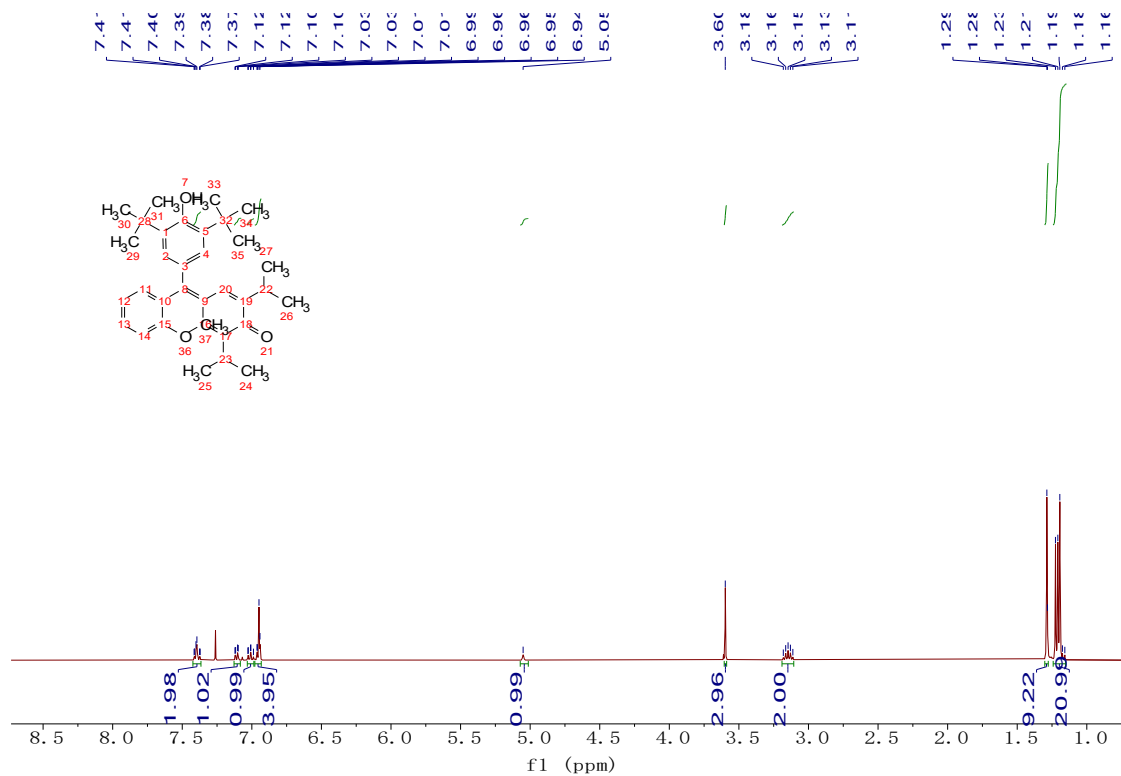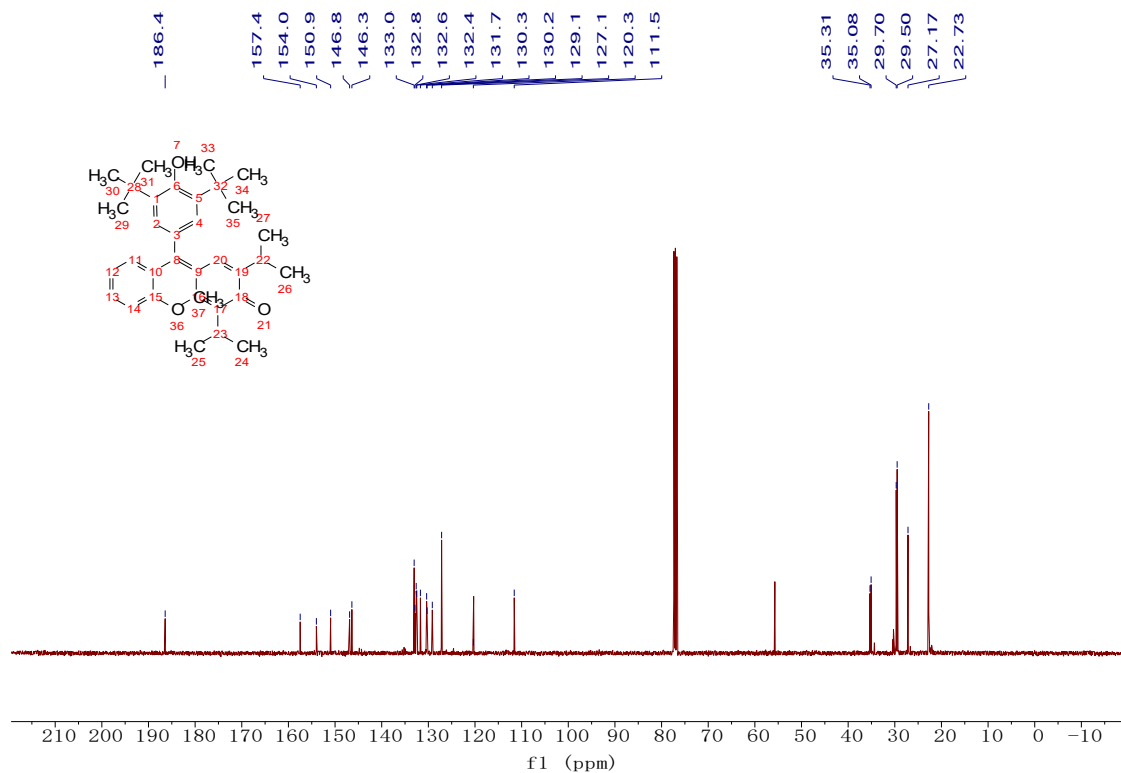

**4-((3,5-di-tert-butyl-4-hydroxyphenyl)(4-nitrophenyl)methylene)-2,6-diisopropylcyclohexa-2,5-dien-1-one(2ad)**

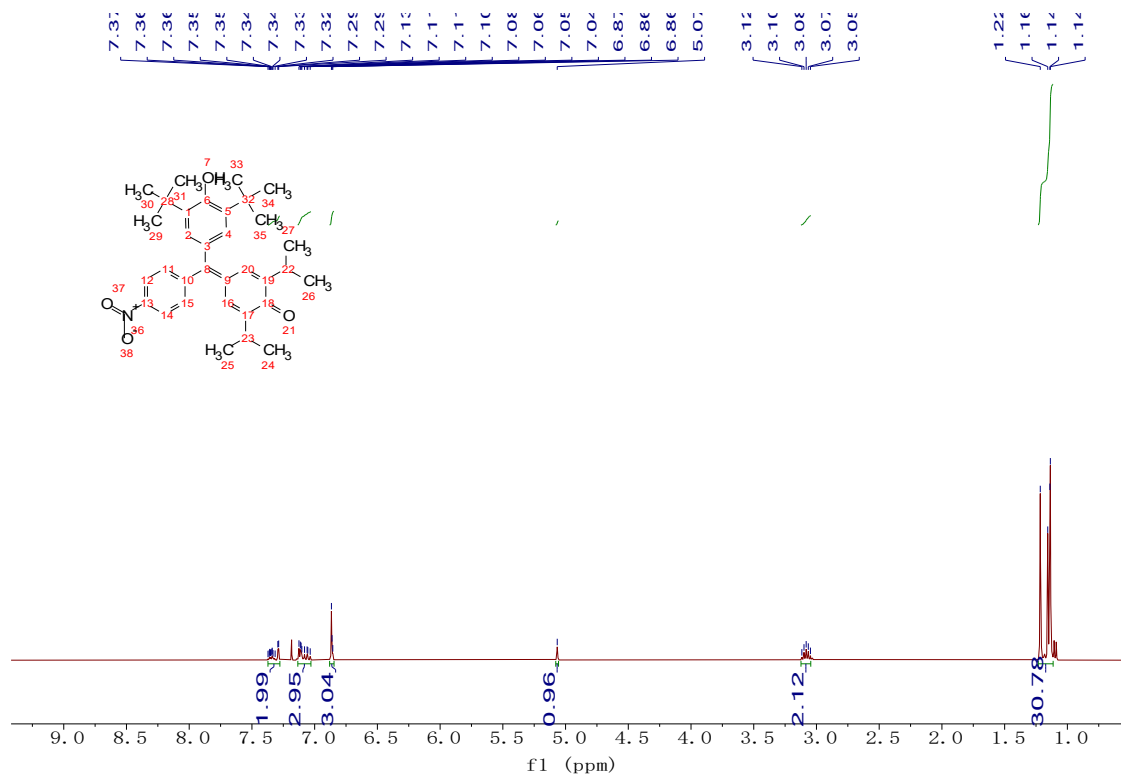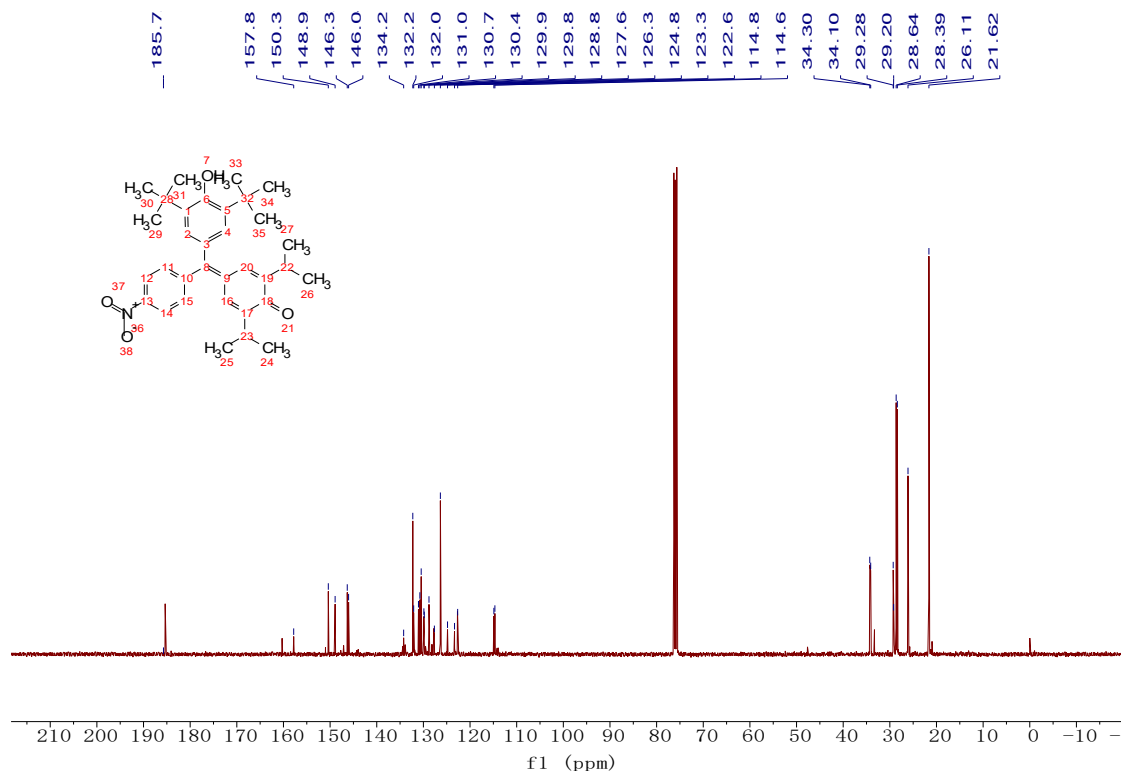



**4-((3,5-di-tert-butyl-4-hydroxyphenyl)(3,4,5-trimethoxyphenyl)methylene)-2,6-diisopropylcyclohexa-2,5-dien-1-one(2ae)**

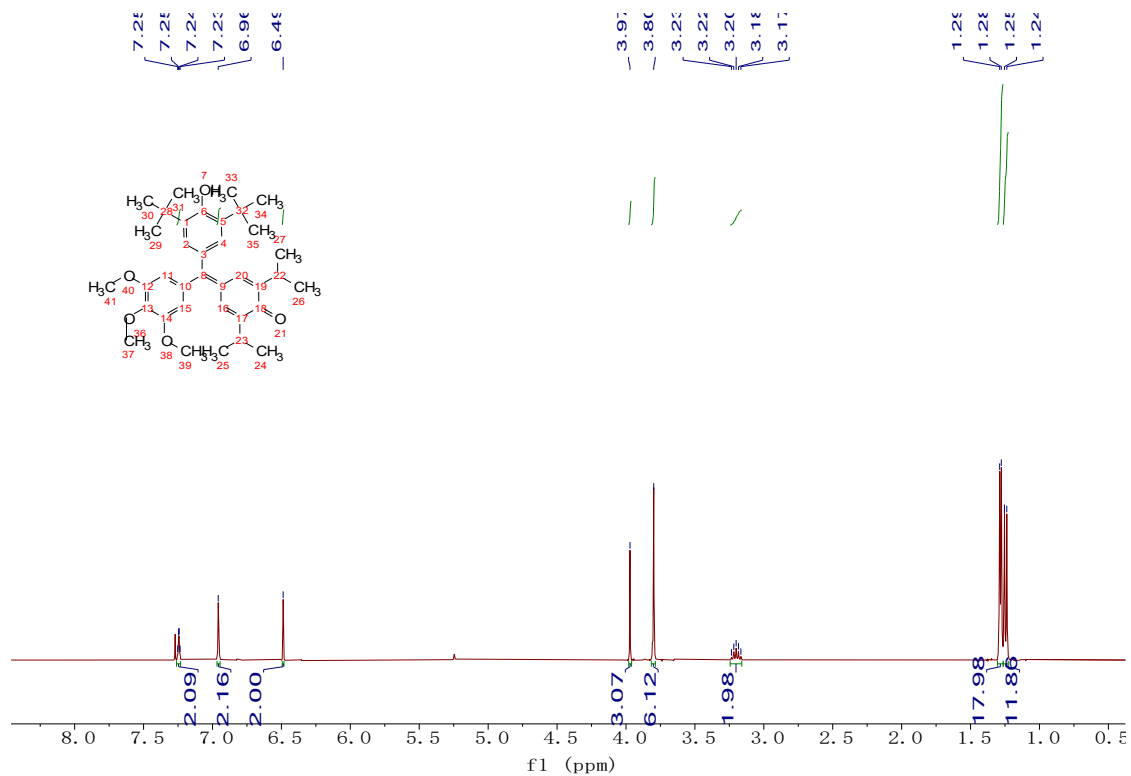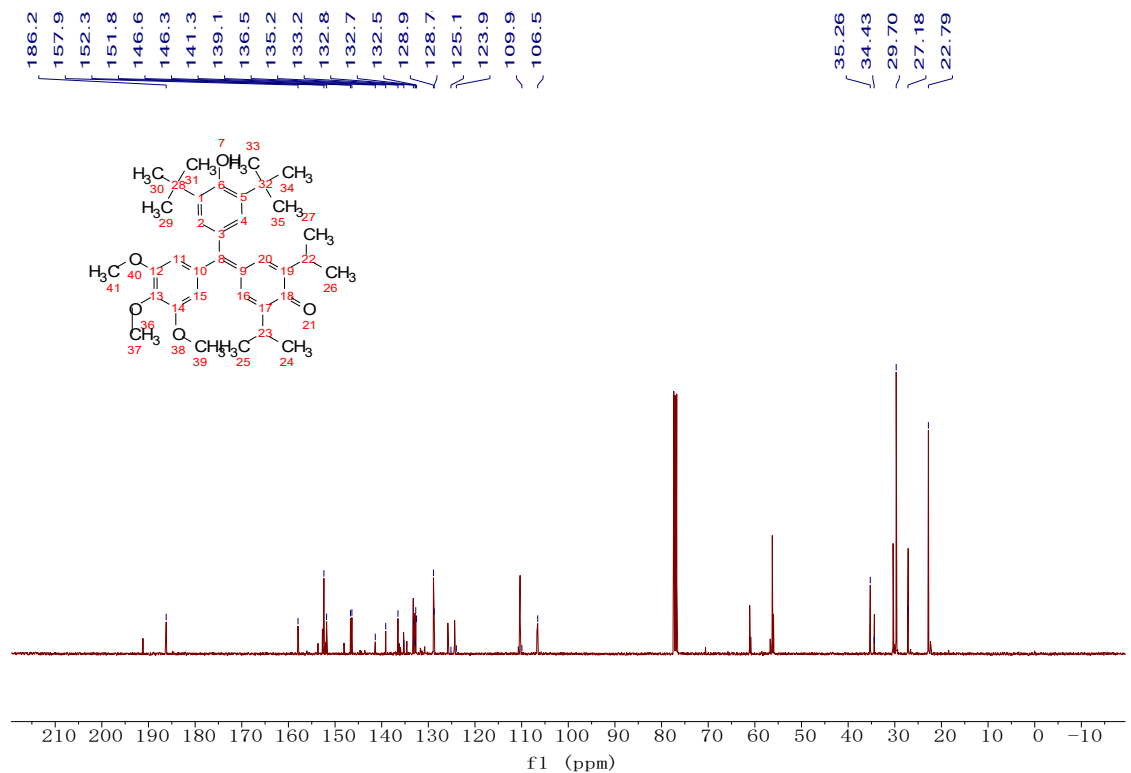

**4-((3,5-di-tert-butyl-4-hydroxyphenyl)(thiophen-2-yl)methylene)-2,6-diisopropylcyclohexa-2,5-dien-1-one(2af)**

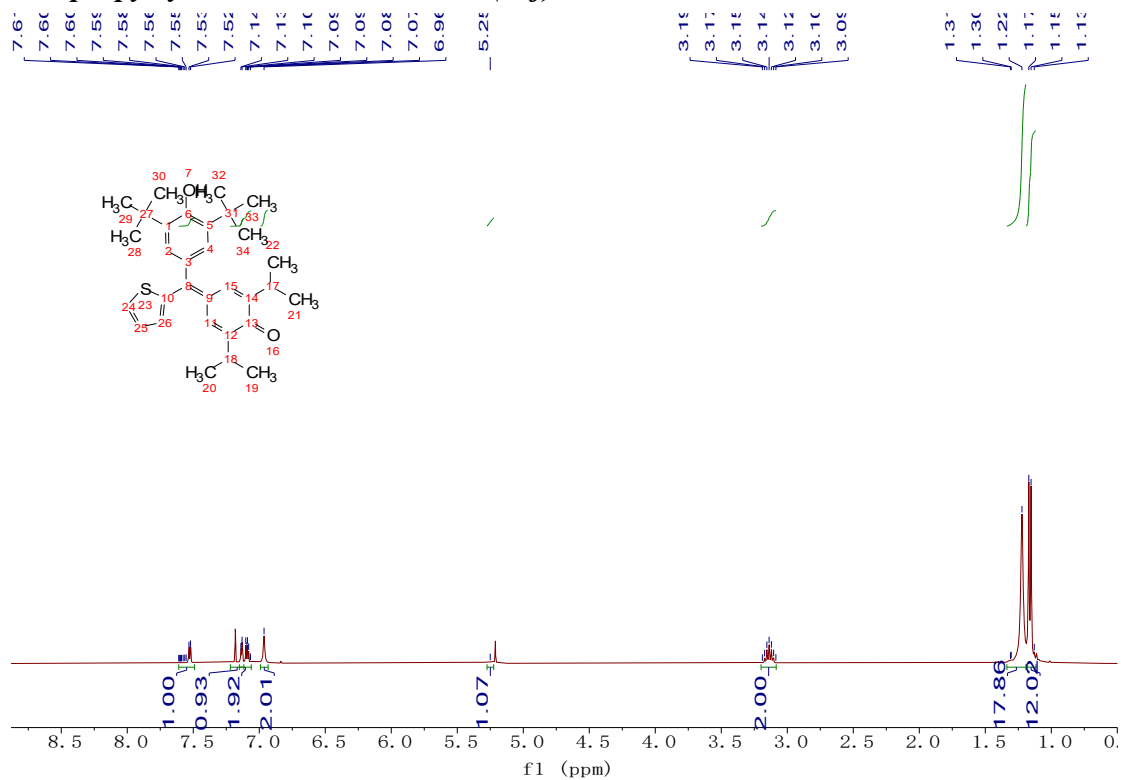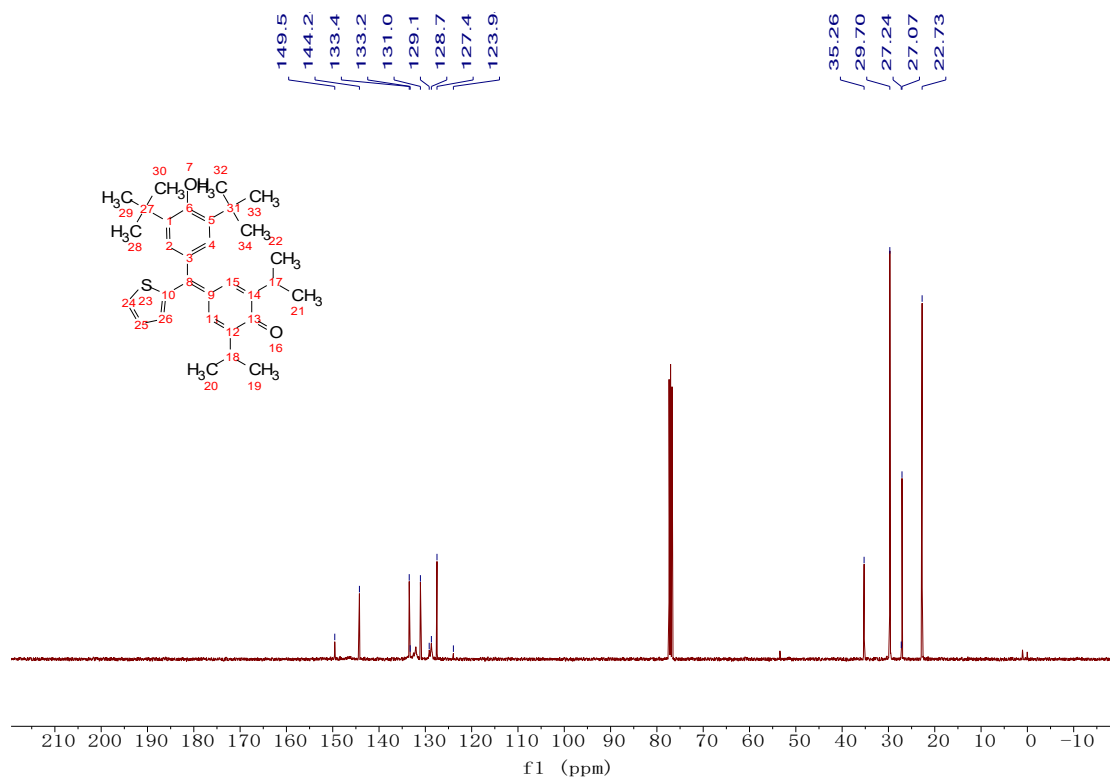

**4-((3,5-di-tert-butyl-4-hydroxyphenyl)(naphthalen-2-yl)methylene)-2,6-diisopropylcyclohexa-2,5-dien-1-one(2ag)**

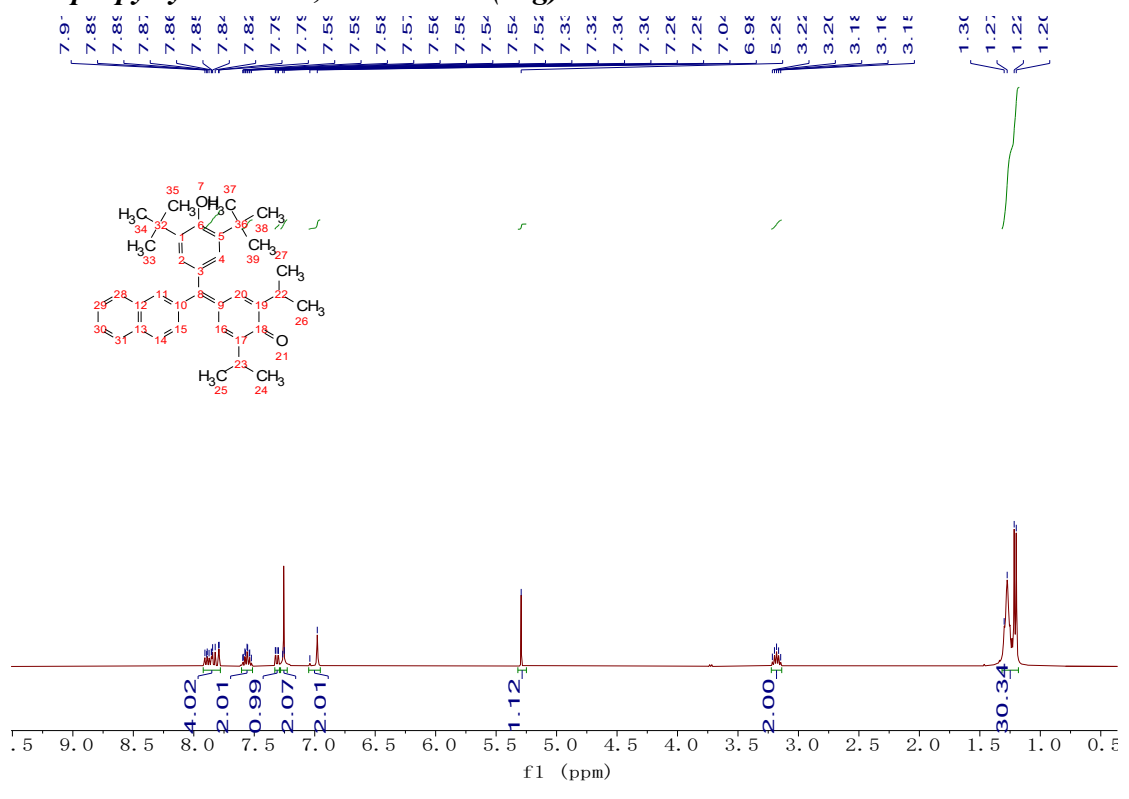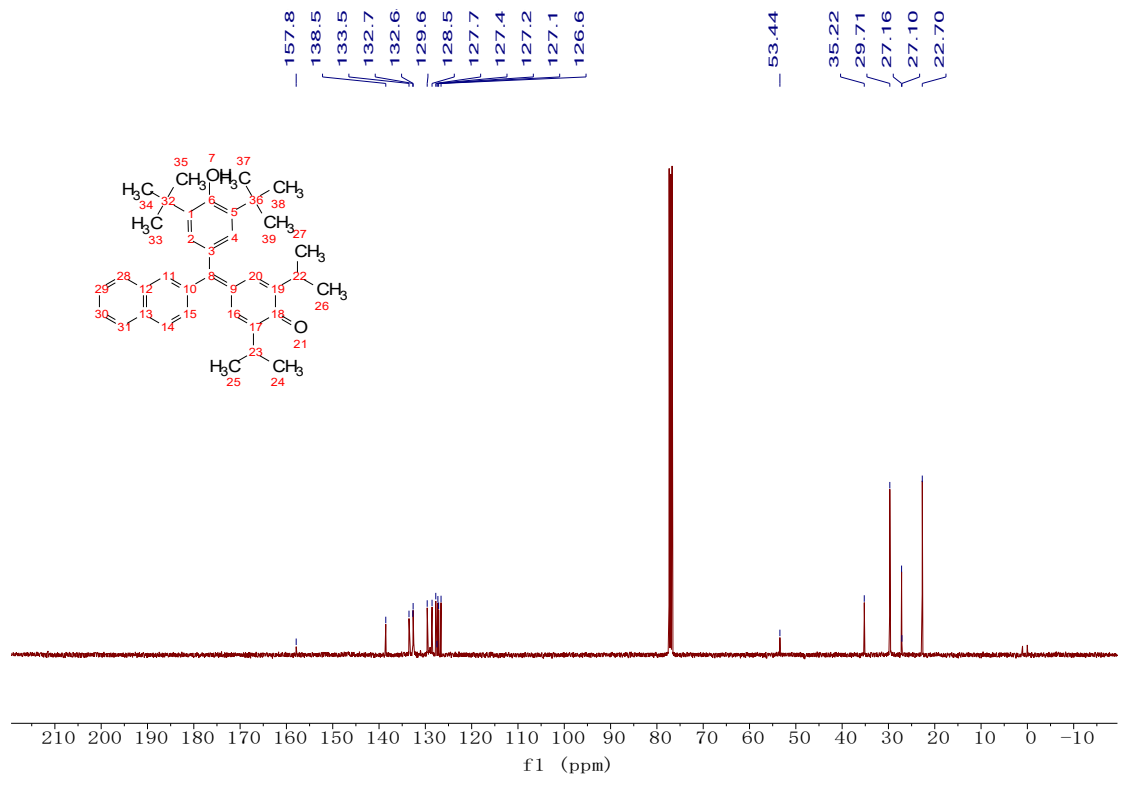

**4-((3,5-di-tert-butyl-4-hydroxyphenyl)(2,6-dichlorophenyl)methylene)-2,6-diisopropylcyclohexa-2,5-dien-1-one(2ah)**

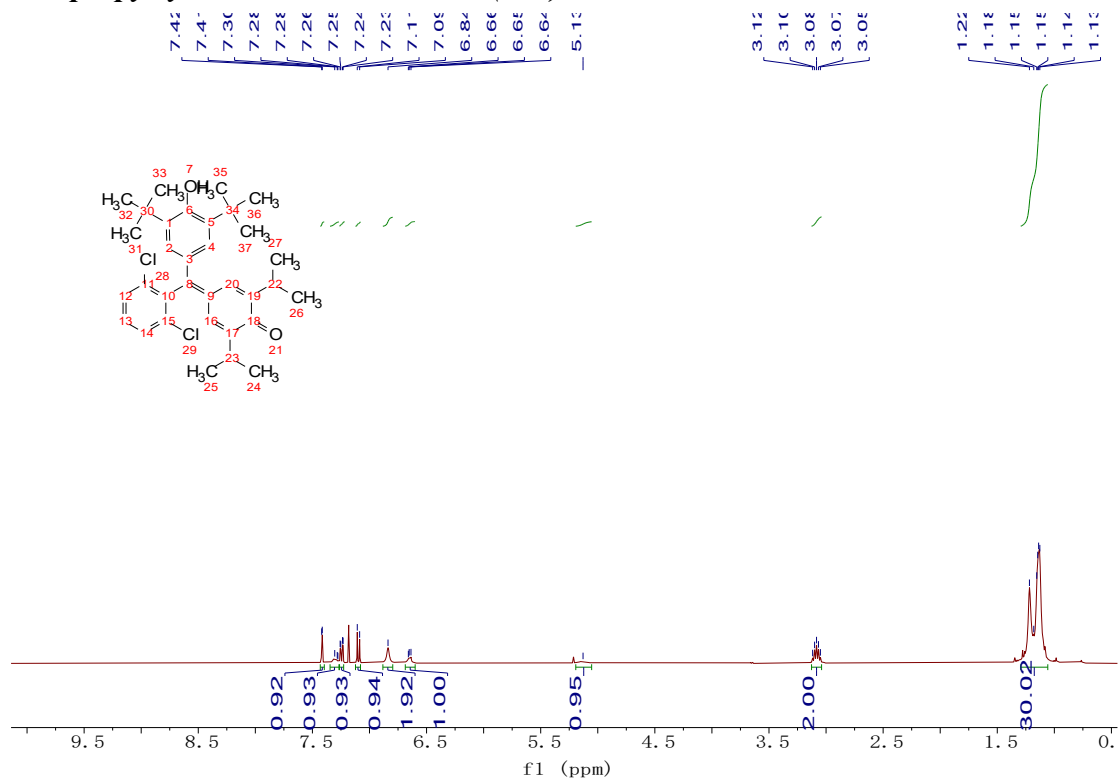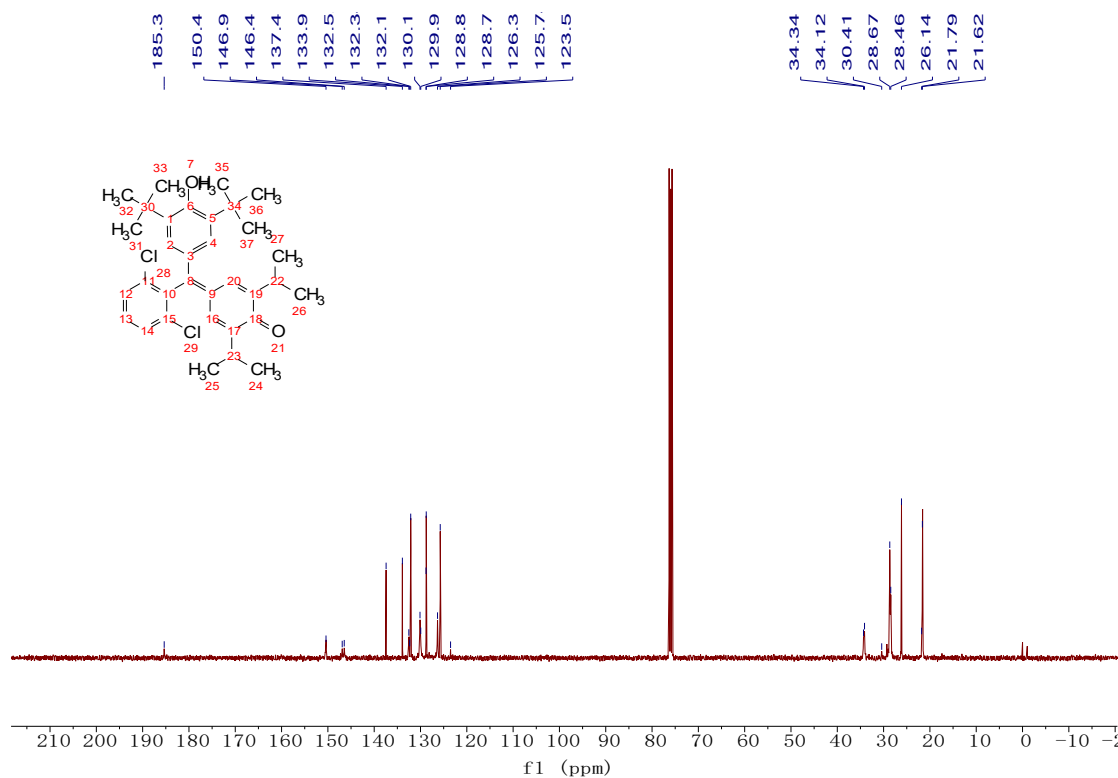

**4-((3,5-di-tert-butyl-4-hydroxyphenyl)(phenyl)methylene)-2,6-dimethylcyclohexa-2,5-dien-1-one(2ai)**

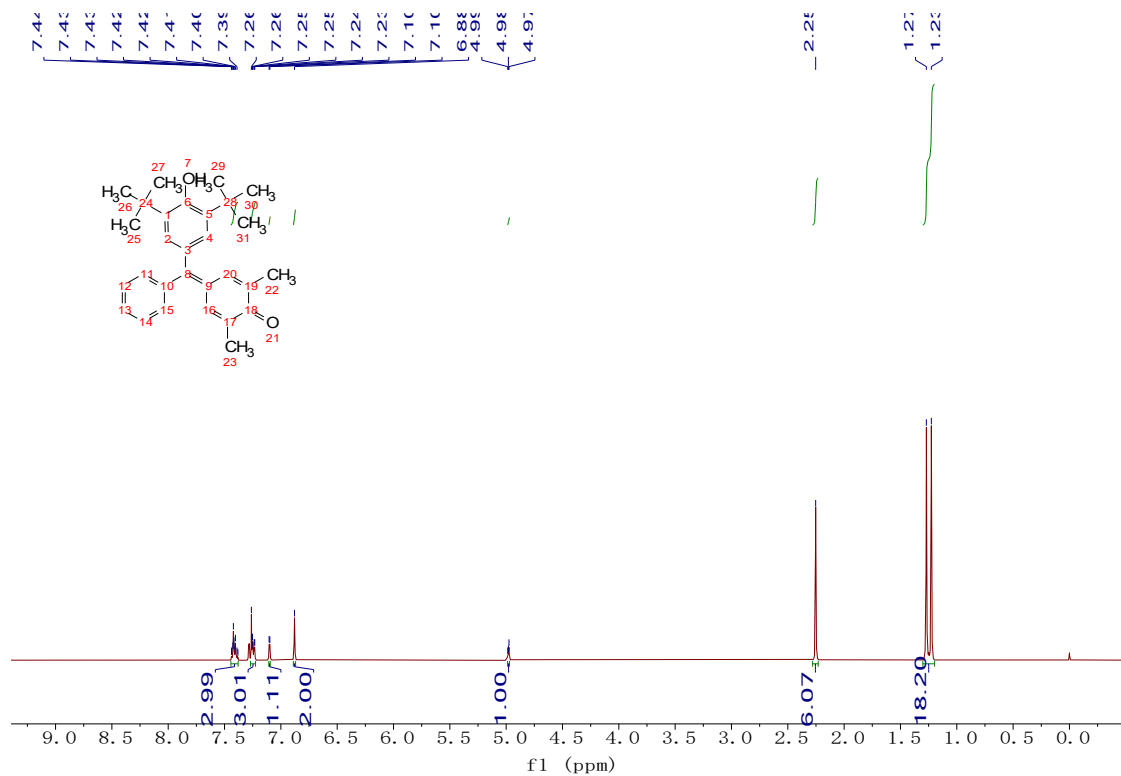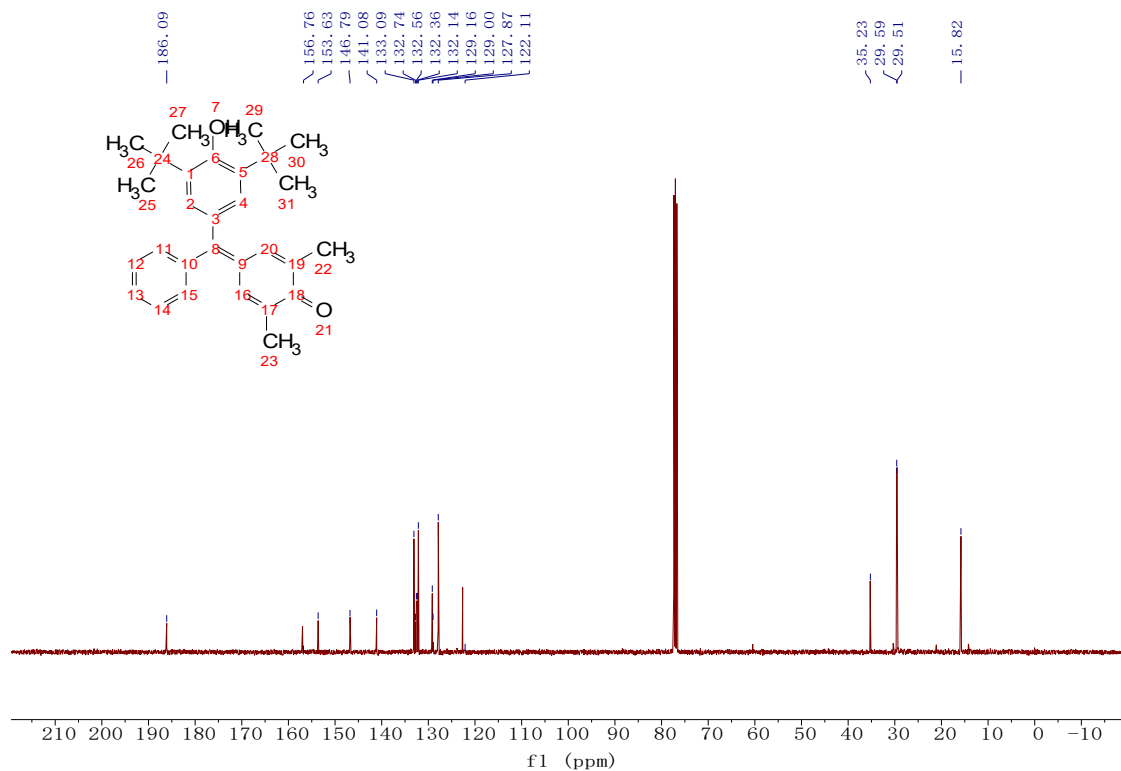

**4-((3,5-di-tert-butyl-4-hydroxyphenyl)(p-tolyl)methylene)-2,6-dimethylcyclohexa-2,5-dien-1-one(2aj)**

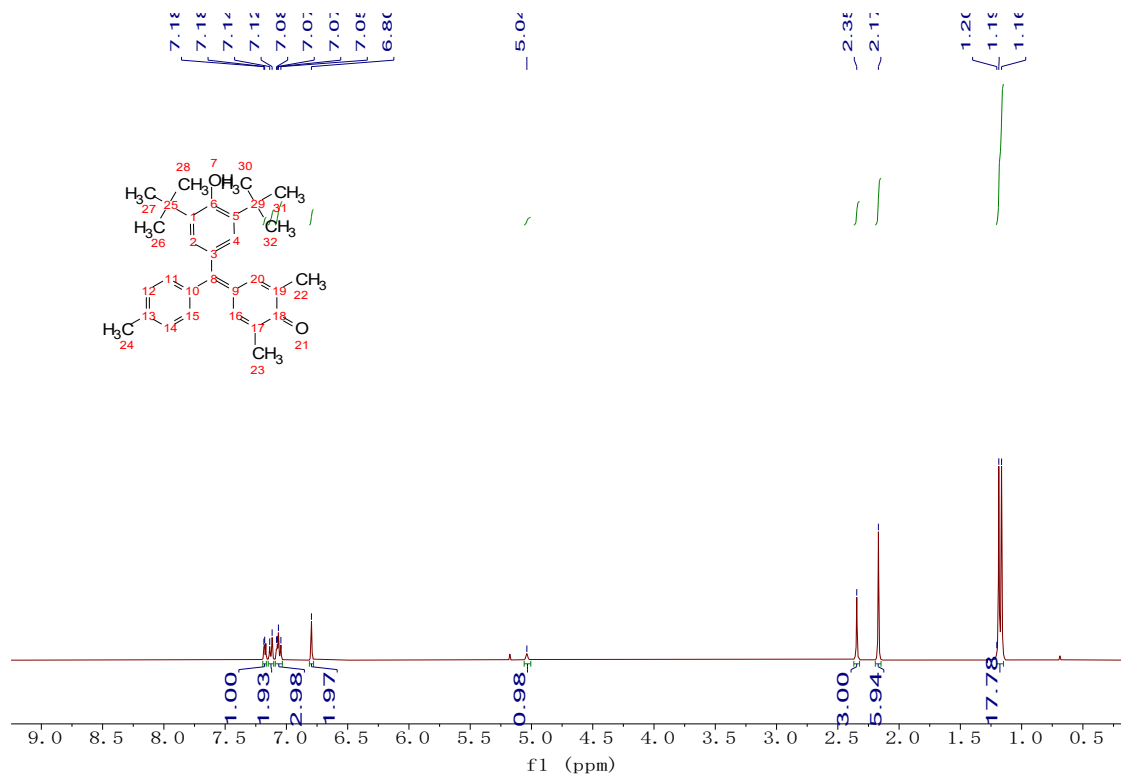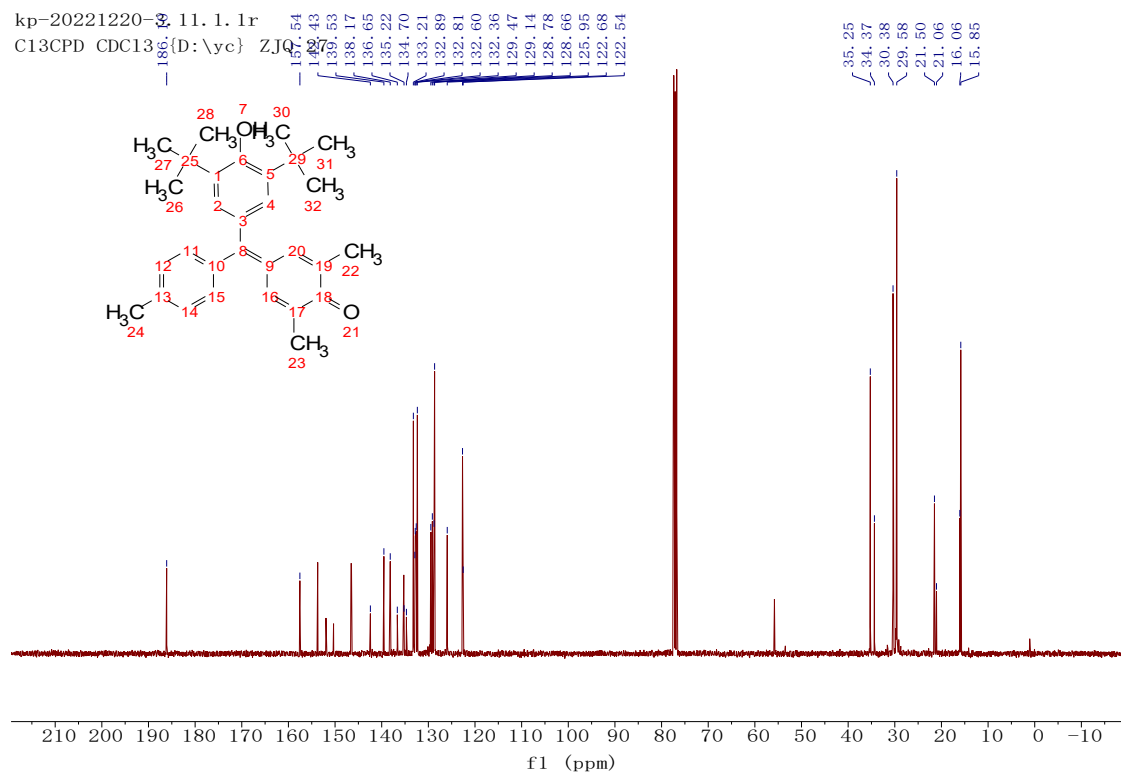

**4-((3,5-di-tert-butyl-4-hydroxyphenyl)(m-tolyl)methylene)-2,6-dimethylcyclohexa-2,5-dien-1-one(2ak)**

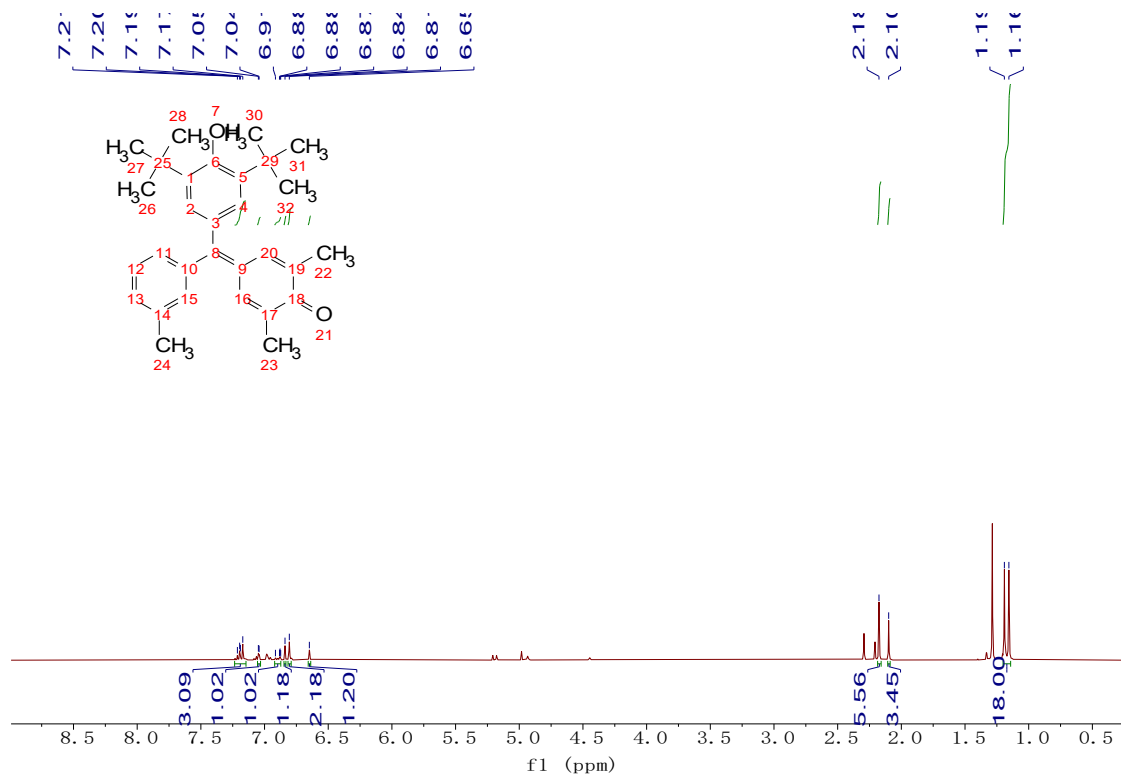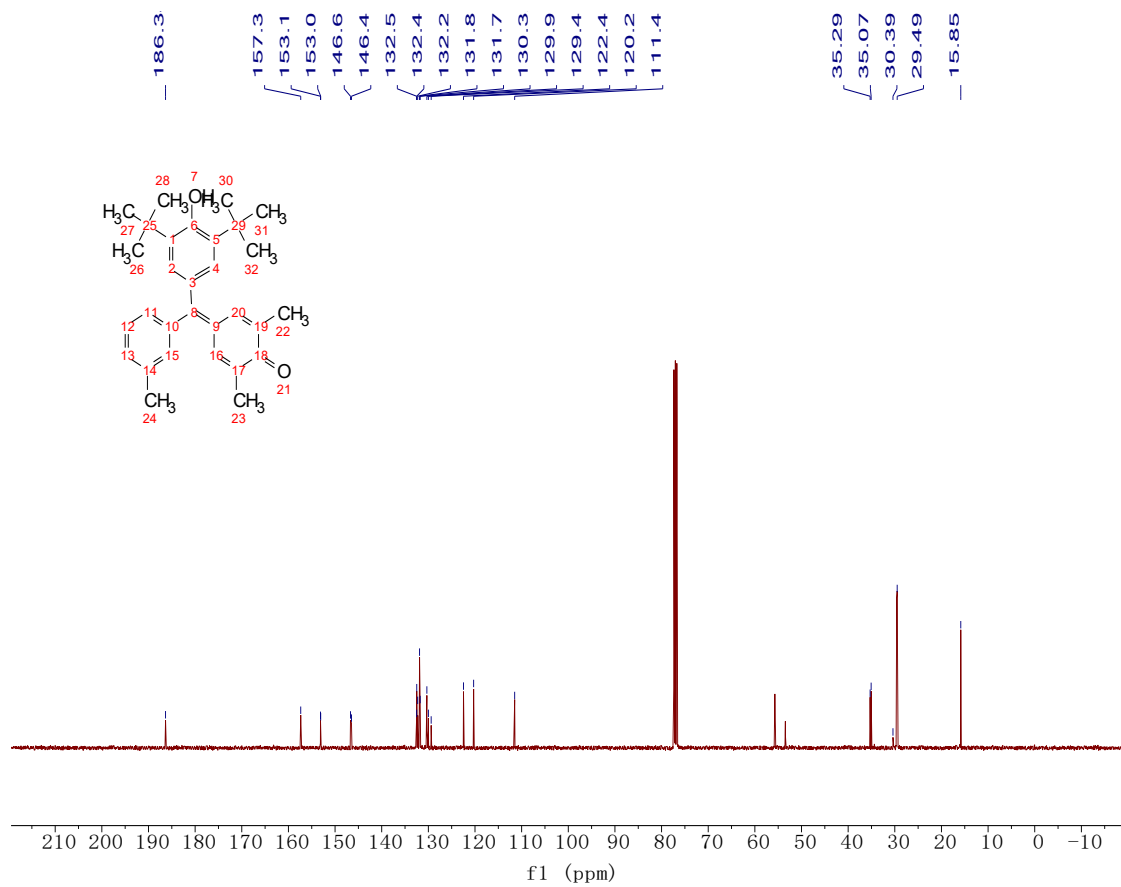





**4-((3,5-di-tert-butyl-4-hydroxyphenyl)(2-methoxyphenyl)methylene)-2,6-dimethylcyclohexa-2,5-dien-1-one(2a)**

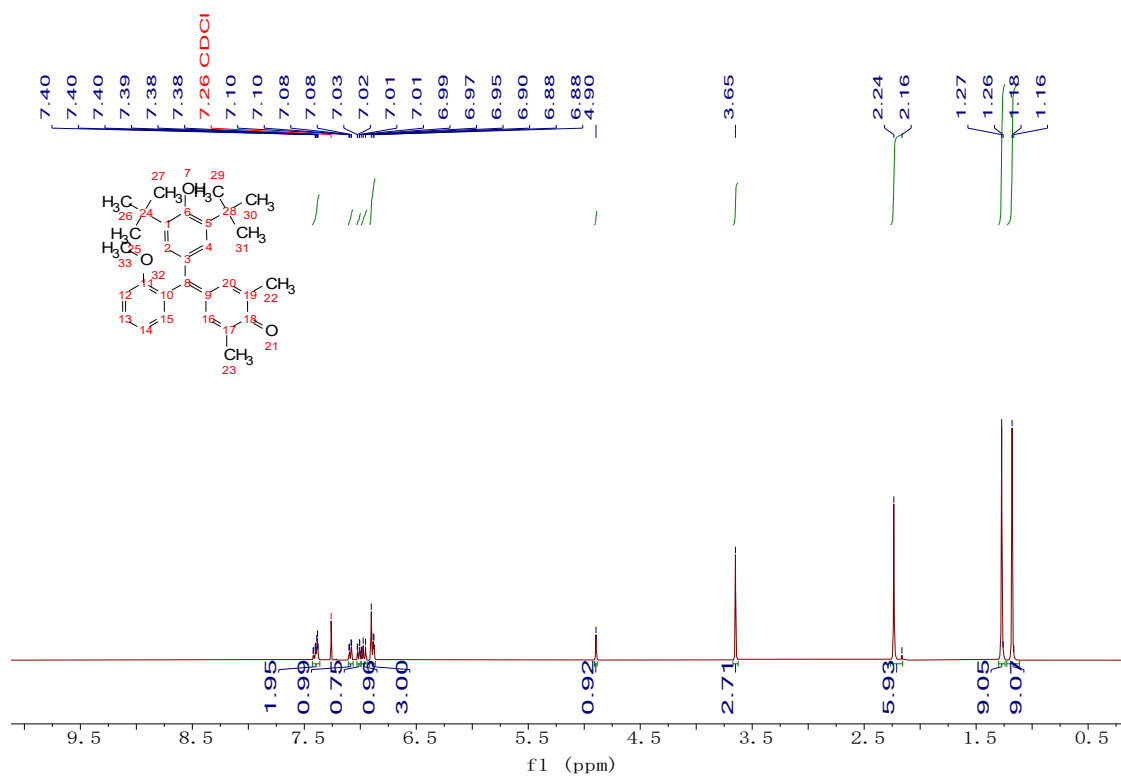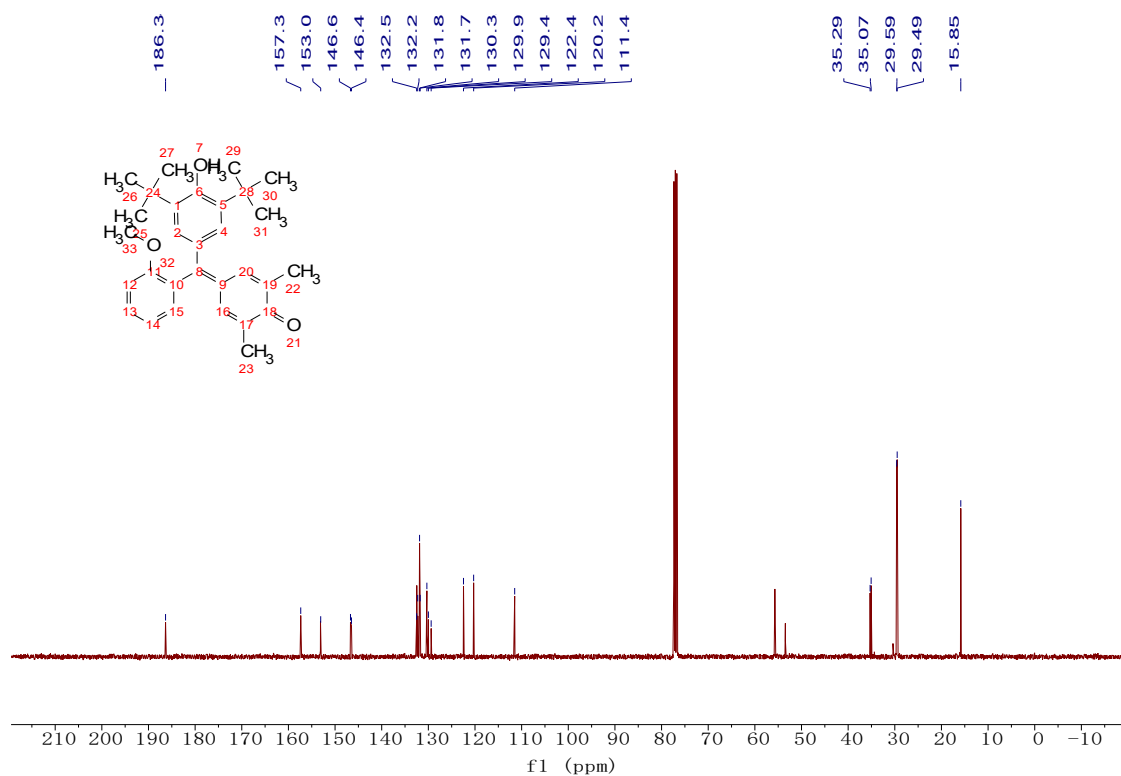

**4-((4-bromophenyl)(3,5-di-tert-butyl-4-hydroxyphenyl)methylene)-2,6-dimethylcyclohexa-2,5-dien-1-one(2am)**

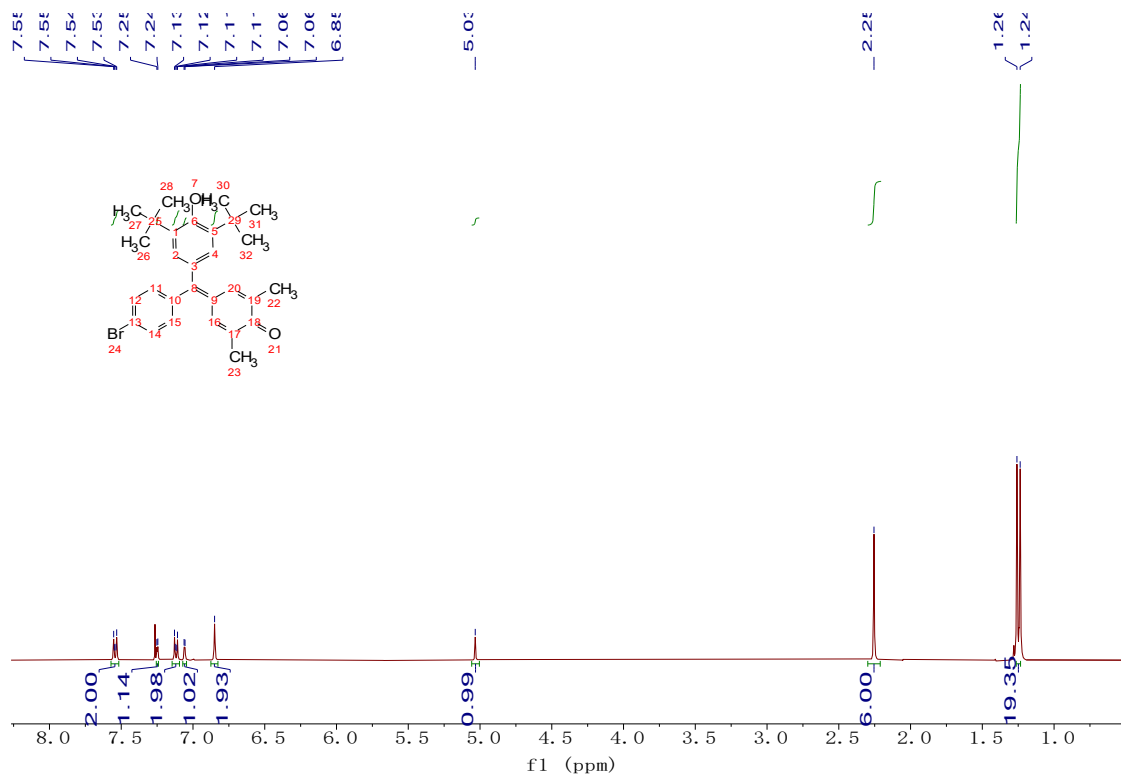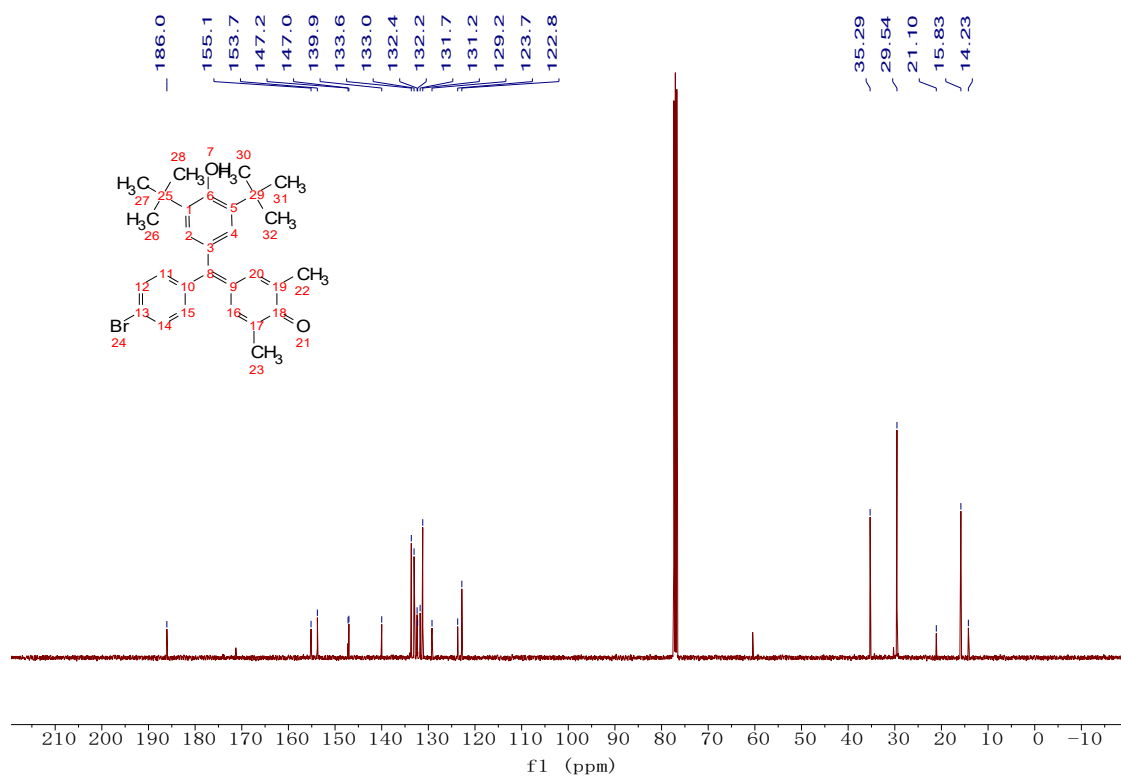

**4-((3,5-di-tert-butyl-4-hydroxyphenyl)methylene)-2,6-dimethylcyclohexa-2,5-dien-1-one(2an)**

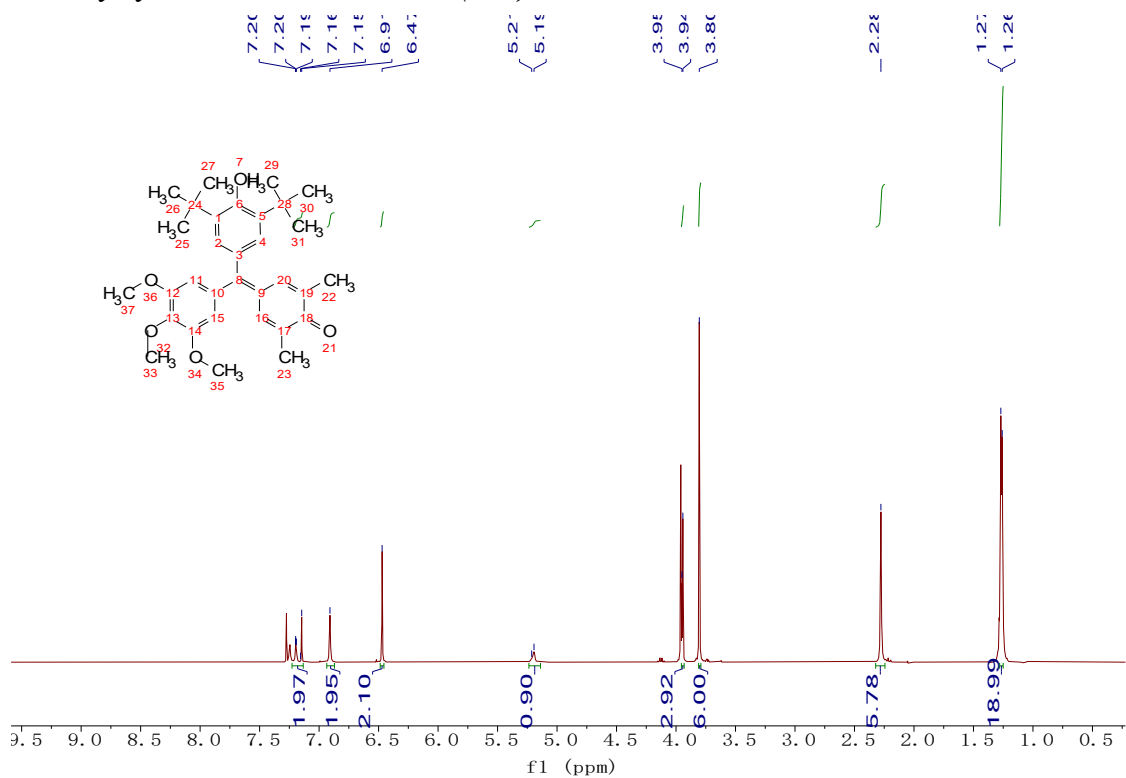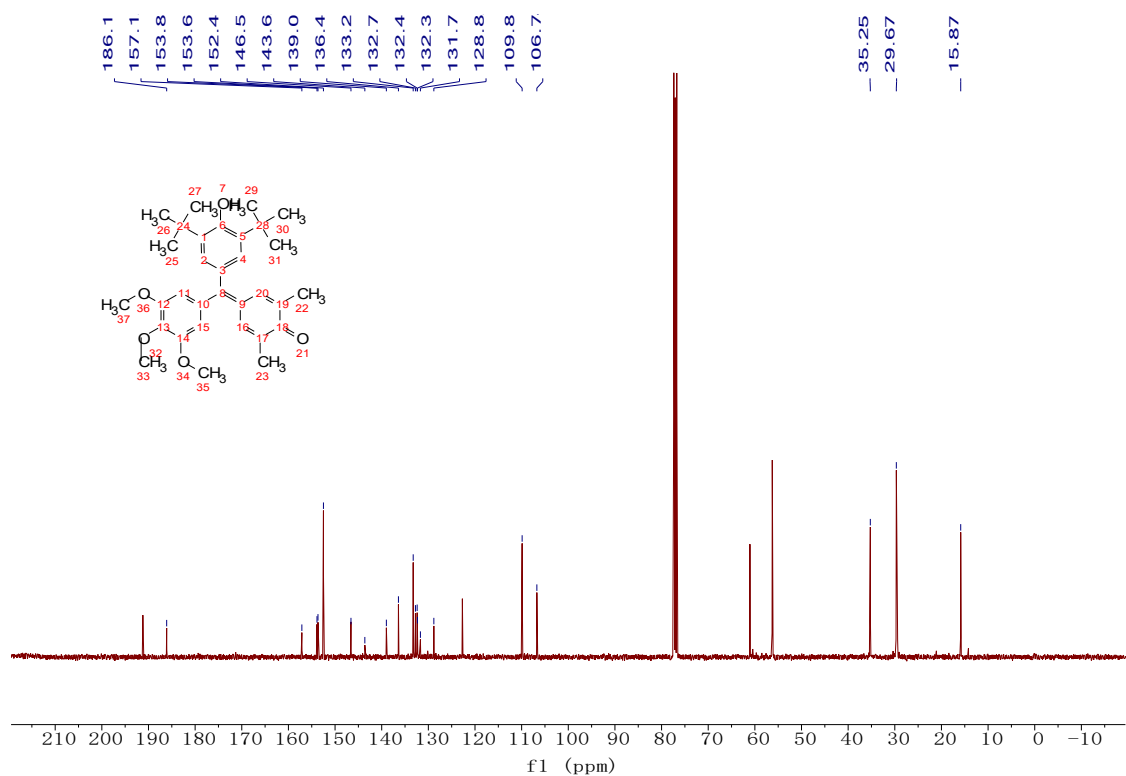

**4-((3,5-di-tert-butyl-4-hydroxyphenyl)(thiophen-2-yl)methylene)-2,6-dimethylcyclohexa-2,5-dien-1-one(2ao)**

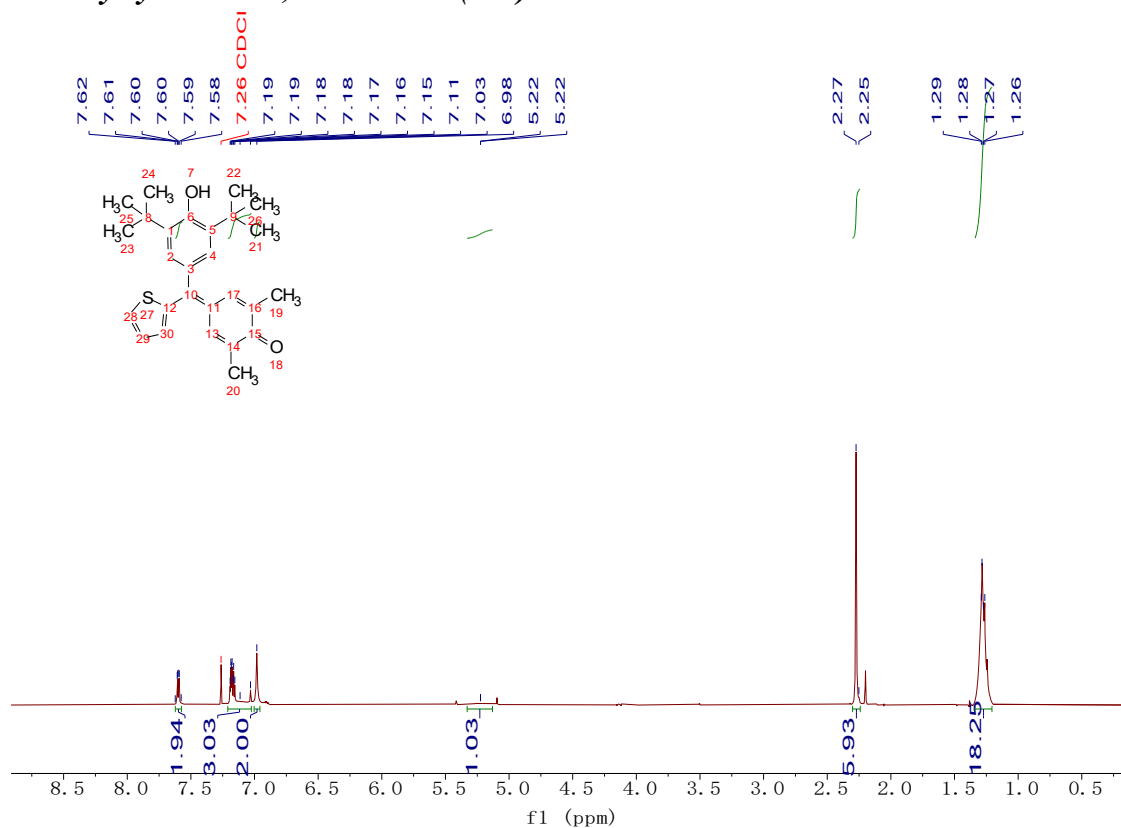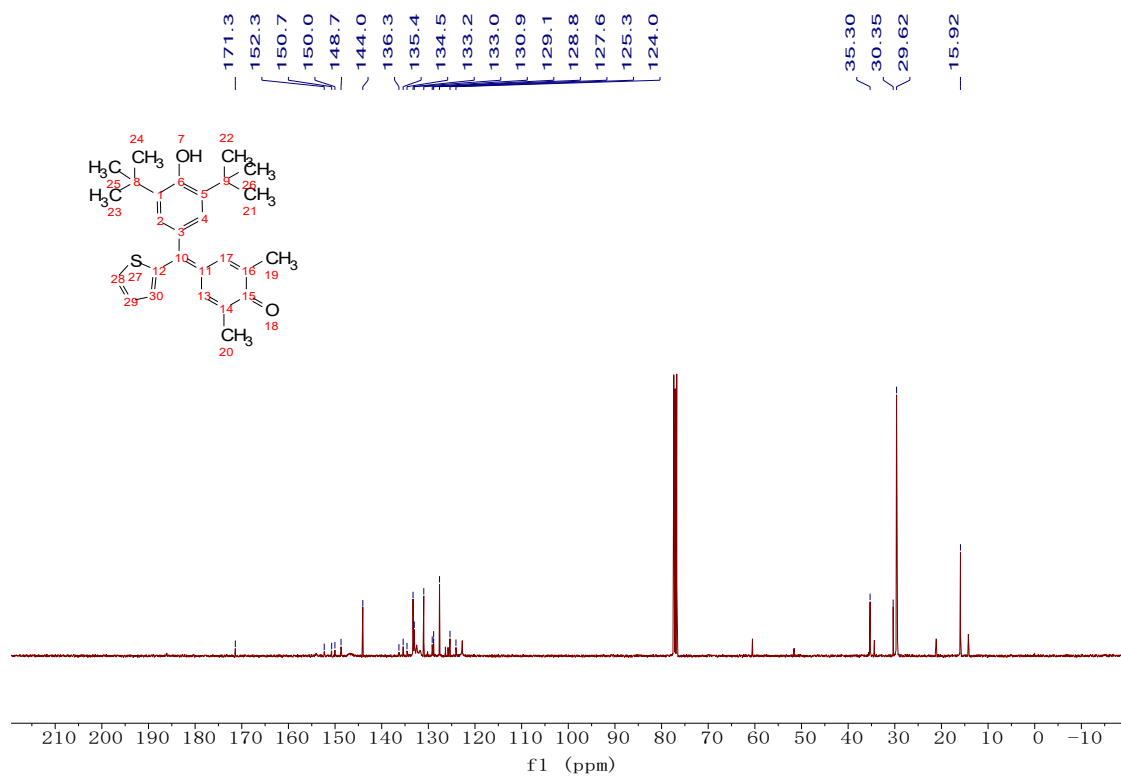

**4-((3,5-di-tert-butyl-4-hydroxyphenyl)(naphthalen-2-yl)methylene)-2,6-dimethylcyclohexa-2,5-dien-1-one(2ap)**

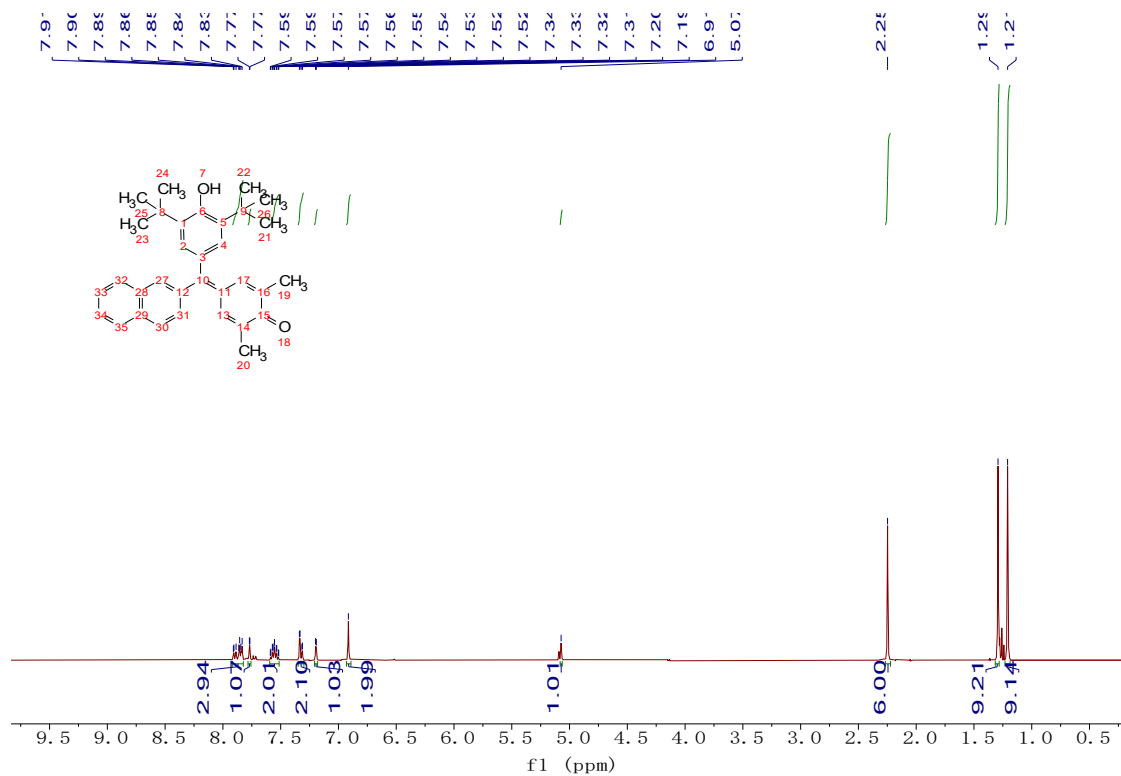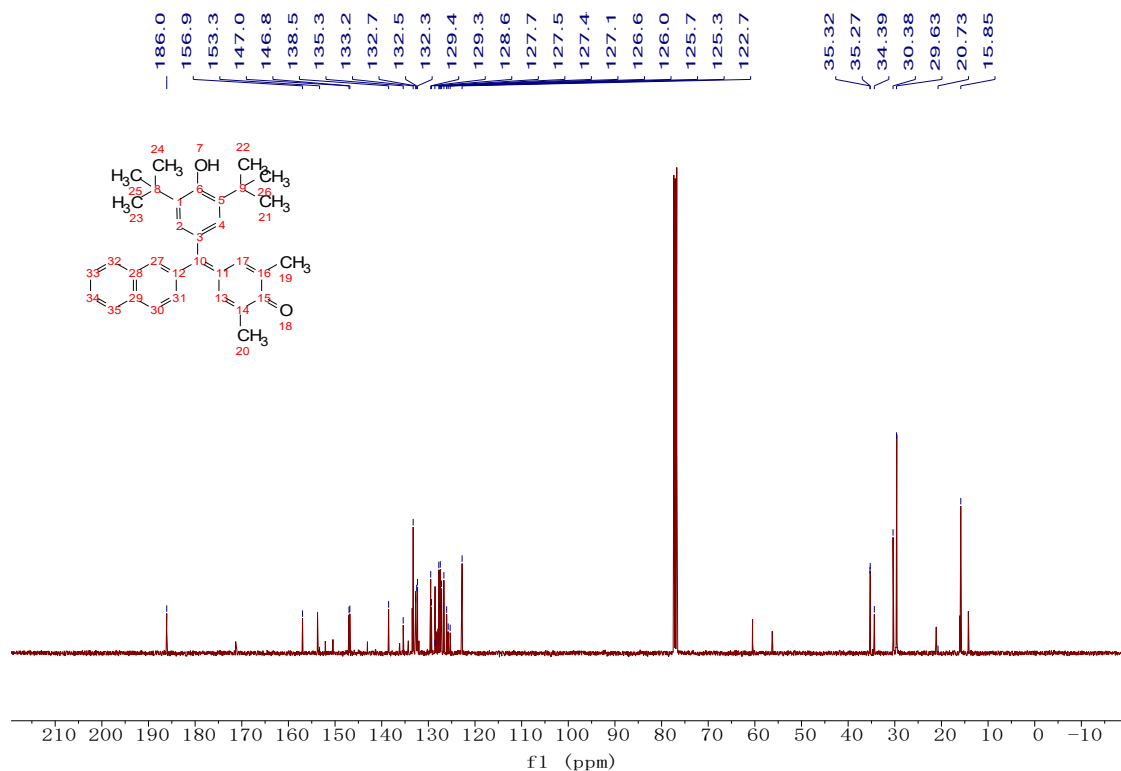

**4-((4-hydroxy-3,5-diisopropylphenyl)(p-tolyl)methylene)-2,6-dimethylcyclohexa-2,5-dien-1-one (2aq)**

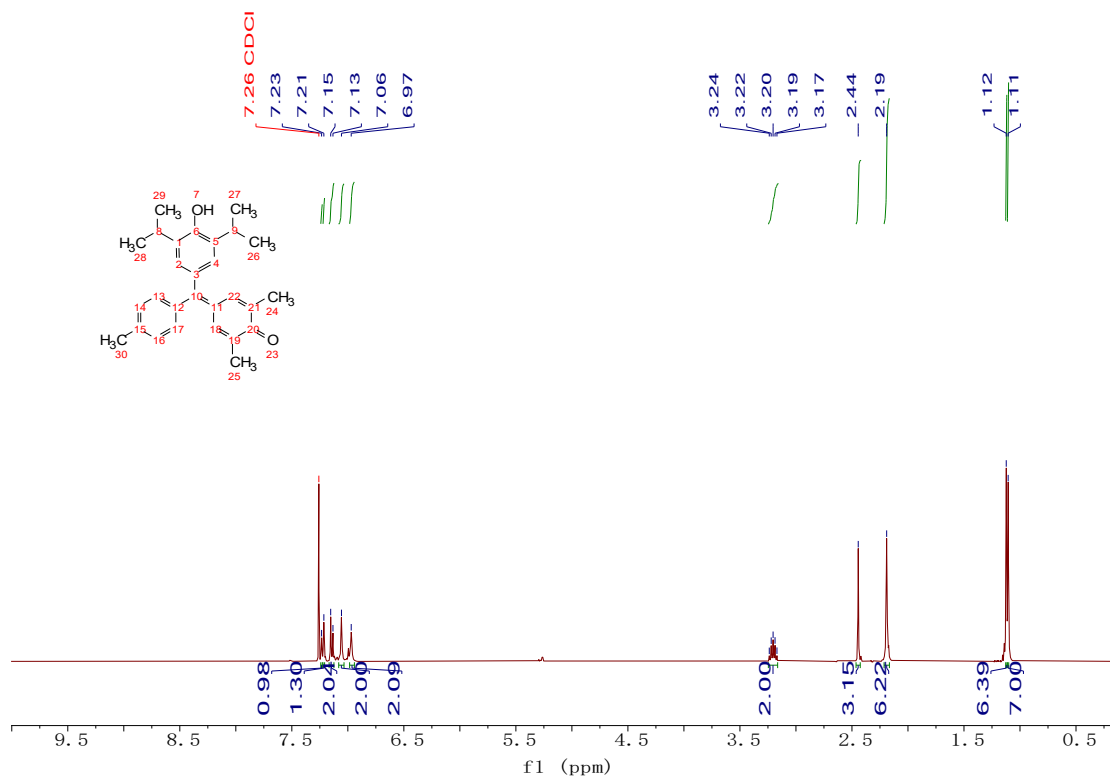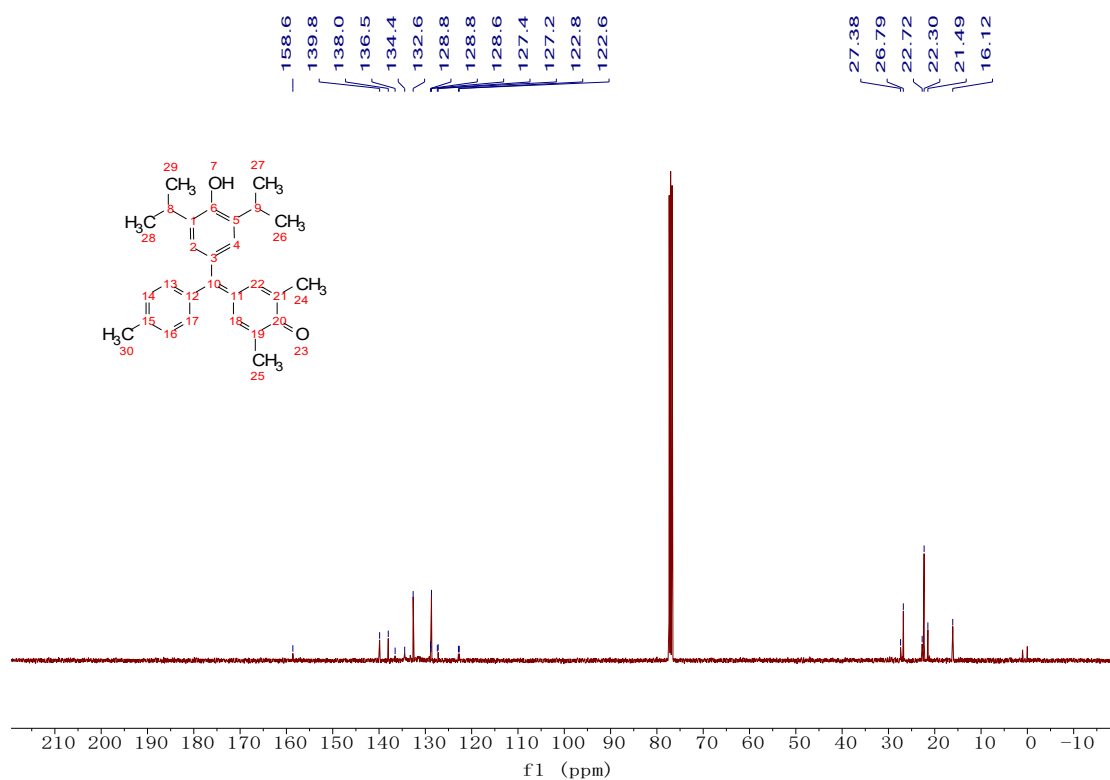

**4-((4-bromophenyl)(4-hydroxy-3,5-diisopropylphenyl)methylene)-2,6-dimethylcyclohexa-2,5-dien-1-one(2ar)**

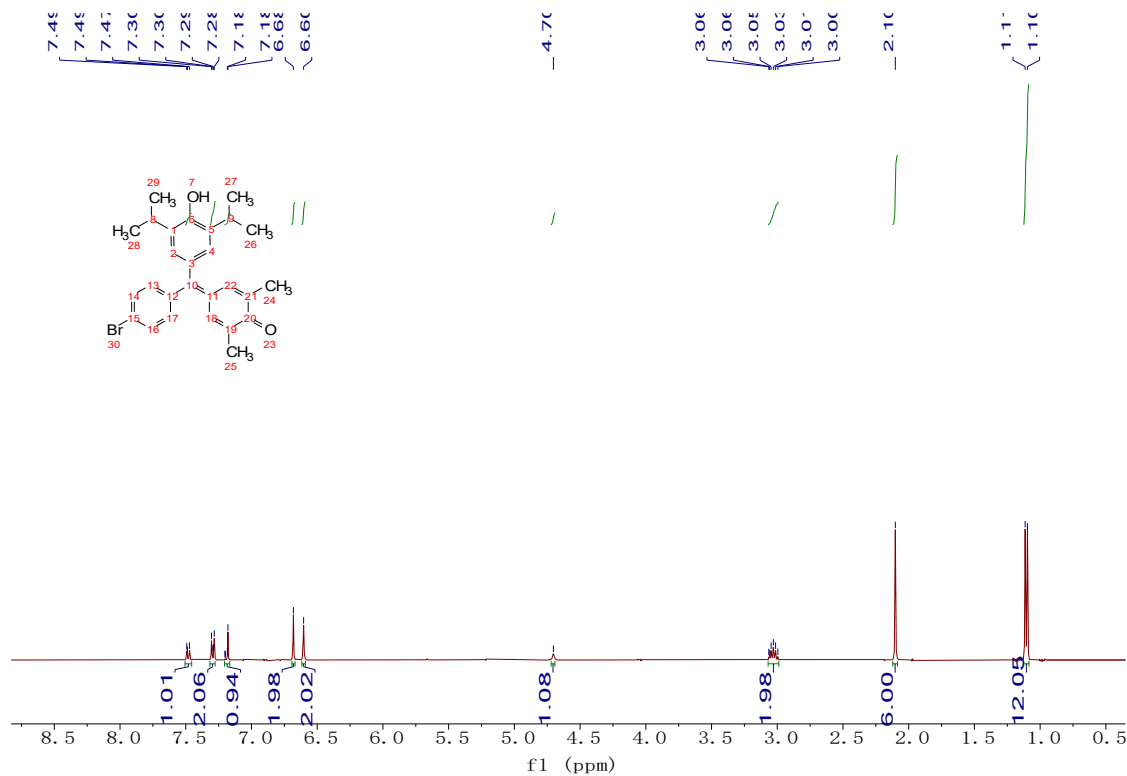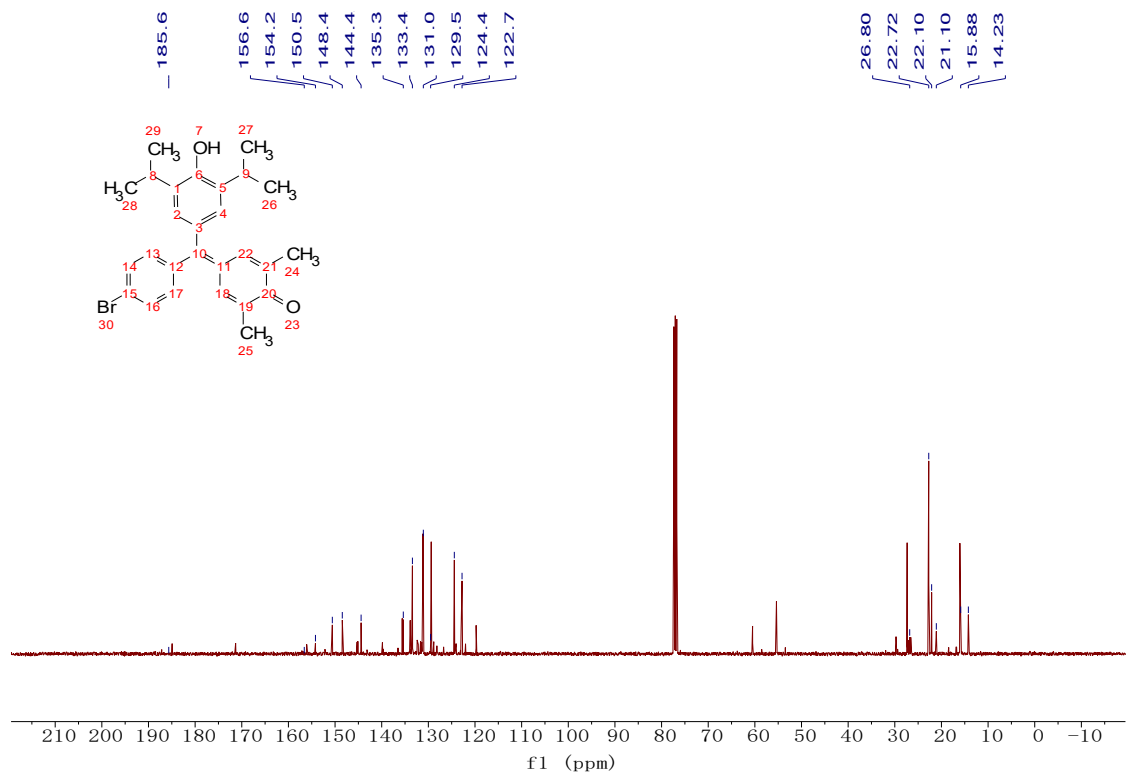

Supplement: d3ob01018j1.pdf [file d3ob01018j1.pdf]
